# Supplementary material for: Genetic Analysis of Kernel Traits in Maize-Teosinte Introgression Populations
Source: Oxford University Press journal article supplement (doi:10.1534/g3.116.030155), 2016-06-25
Supplement: 030155_figures1.pdf [file 030155_figures1.pdf]

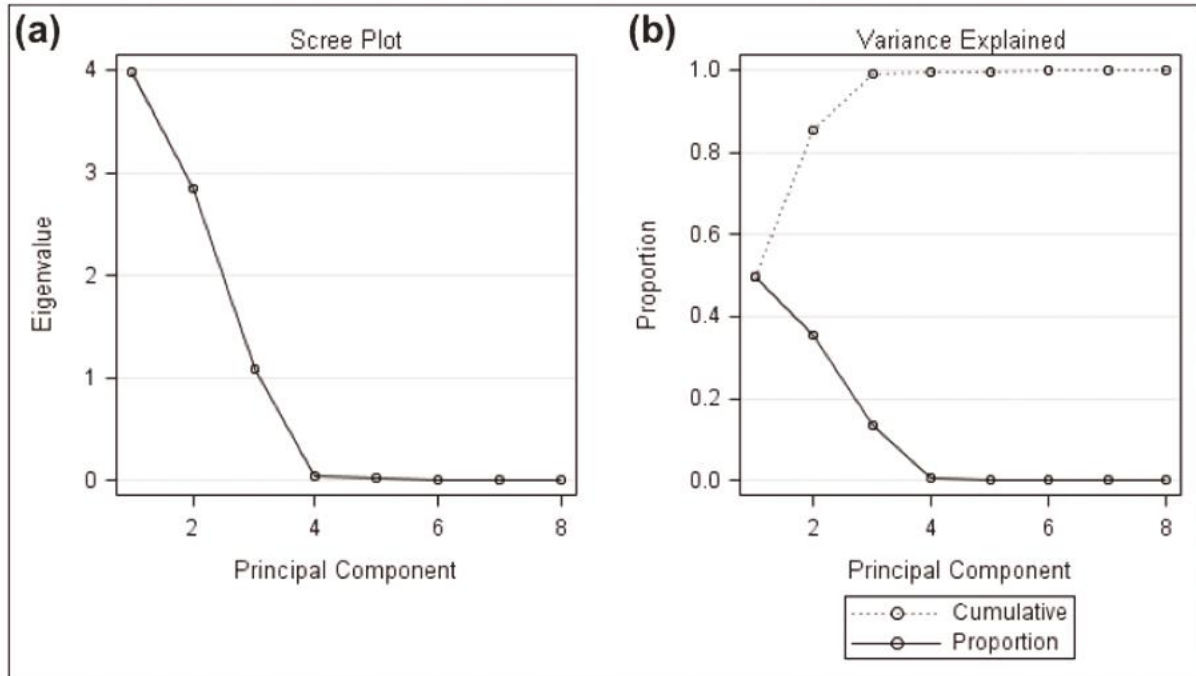

**Figure S1.** Principal component analysis of kernel weight and shape traits. (a) Eigenvalues of principal components (PCs). PCs with eigenvalue greater than 1 were retained. (b) Variance explained by different PCs. Dashed line represents the cumulative variance, while solid line represents variance explained by single PC
