# Supplementary material for: Genetic Analysis of Kernel Traits in Maize-Teosinte Introgression Populations
Source: G3 (Bethesda). 2016 Jun 9;6(8):2523–30. doi: 10.1534/g3.116.030155 (PMC4978905; doi:10.1534/g3.116.030155)
Supplement: Supplemental Material [file supp_g3.116.030155_TableS1.xlsx]

## Sheet: Table S1
Table S1. Genetic map and imputed genotypes of the BC4S2/DH NILs
TeoNIL_Marker	Chrom	dist(cM)a	marker id a	SNP_Name
t1	1	0	m0001	PZA01271.1
t2	1	0.9	m0002	PZA03613.1
t3	1	3.7	m0003	PZA02129.1
t4	1	5.1	m0004	PZA02032.1
t5	1	9.7	m0005	PHM2244.142
t6	1	11.5	m0006	PZA02372.1
t7	1	13.4	m0007	PHM6238.36
t8	1	17.4	m0011	PZA00447.8
t9	1	19.6	m0014	PZA00566.5
t10	1	20.1	m0016	PZA03521.1
t11	1	24.4	m0018	PZA03551.1
t12	1	29.7	m0020	csu1171.2
t13	1	29.9	m0021	PZA01652.1
t14	1	31.7	m0022	PZA02094.9
t15	1	33.9	m0024	PZB00648.5
t16	1	33.9	m0025	PZB00718.5
t17	1	34.3	m0026	PZA01030.1
t18	1	37.8	m0027	PZA00425.11
t19	1	39.5	m0030	PHM3226.15
t20	1	39.7	m0031	PHM4531.46
t21	1	43.2	m0032	PZB01957.1
t22	1	47.3	m0033	PZB02058.1
t23	1	51.7	m0034	PZA02490.1
t24	1	54	m0038	PZA02686.1
t25	1	56.5	m0039	PZA02271.1
t26	1	59	m0041	PZA00240.6
t27	1	59	m0042	PHM3726.129
t28	1	59.9	m0043	PZA00962.1
t29	1	60.8	m0045	PZA03742.1
t30	1	60.8	m0046	PZA03243.2
t31	1	61.6	m0047	PZA00081.18
t32	1	62.1	m0048	umc13.1
t33	1	62.1	m0049	PZA03183.5
t34	1	62.3	m0050	PZB00872.3
t35	1	64.9	m0051	PHM4913.18
t36	1	65.7	m0052	PZA02292.1
t37	1	66	m0053	PZA03168.5
t38	1	69.1	m0054	PZA02737.1
t39	1	69.4	m0055	PZA02550.1
t40	1	69.6	m0056	PZA02114.1
t41	1	72	m0058	PZA03561.1
t42	1	72	m0059	PZA01315.1
t43	1	72.5	m0060	PZA01476.1
t44	1	73.3	m0061	PZA00294.22
t45	1	73.3	m0062	PZA03189.4
t46	1	81.4	m0065	PZA00752.1
t47	1	82.4	m0066	PZA01135.1
t48	1	87.3	m0071	PHM9418.11
t49	1	88.6	m0074	PZA00939.1
t50	1	89.1	m0076	PZA02070.1
t51	1	89.6	m0078	PZA02577.1
t52	1	91.4	m0080	PZA02741.1
t53	1	92	m0081	PZA02135.2
t54	1	94.9	m0082	an1.5
t55	1	96.5	m0083	PZA00455.16
t56	1	97.7	m0084	PZA02191.1
t57	1	98.4	m0085	PHM1968.22
t58	1	99.2	m0086	PZA00068.1
t59	1	108.4	m0088	PZA00619.3
t60	1	115	m0090	PZA03074.27
t61	1	116.2	m0091	PZA01216.1
t62	1	116.4	m0092	PZA00131.15
t63	1	120.3	m0096	PZA01019.1
t64	1	123.7	m0097	PZA03194.1
t65	1	123.7	m0098	PZA03193.2
t66	1	123.7	m0099	PHM12706.14
t67	1	124.2	m0100	PZA02014.3
t68	1	124.6	m0101	PZA01039.1
t69	1	127.6	m0103	PHM6043.19
t70	1	127.6	m0104	PZA03741.1
t71	1	129.8	m0105	PHM15871.11
t72	1	131.6	m0107	PZA02117.1
t73	1	132.9	m0108	PZA00658.21
t74	1	133.9	m0109	PZA02823.1
t75	1	134	m0110	PHM2478.22
t76	1	134.7	m0112	PZA00664.3
t77	1	135.2	m0114	PZA02186.1
t78	1	137.6	m0115	PZA03001.15
t79	1	137.6	m0116	PZB01647.1
t80	1	140.2	m0117	PZA00381.4
t81	1	141.9	m0118	PZA03301.2
t82	1	141.9	m0119	PHM4926.16
t83	1	146	m0120	PZA03064.6
t84	1	146.6	m0121	PHM16605.19
t85	1	149.7	m0123	PZA02269.3
t86	1	151.8	m0124	PHM3034.3
t87	1	152.4	m0126	PHM14475.7
t88	1	155.6	m0128	PZA01588.1
t89	1	157.6	m0132	PZA02985.5
t90	1	157.7	m0133	PZA03457.1
t91	1	162.2	m0134	PZB00008.1
t92	1	162.2	m0135	PZB00895.1
t93	1	162.8	m0137	PZA02278.1
t94	1	164.6	m0138	PZA02698.3
t95	1	167.8	m0139	PZA00030.11
t96	1	169.2	m0142	PZA01978.23
t97	1	175.7	m0145	PZA03188.3
t98	1	177.5	m0148	PZA00978.1
t99	1	178.4	m0149	PZA01246.1
t100	1	179.1	m0151	PZA00245.20
t101	1	180	m0153	PZB01403.1
t102	1	180.9	m0154	PZA00894.7
t103	1	181.9	m0156	PZA03305.7
t104	1	185	m0157	PZB01227.6
t105	1	188.2	m0158	PZA02044.1
t106	1	191.7	m0160	PZA00276.18
t107	1	193.1	m0162	PZA00235.9
t108	1	193.8	m0163	PZA00623.3
t109	1	194	m0164	PZA02359.10
t110	1	196.5	m0165	PHM9807.9
t111	1	196.8	m0166	PZA01238.2
t112	1	196.9	m0167	PZA01068.1
t113	1	198	m0169	PHM1275.22
t114	1	199.4	m0170	PZA00856.2
t115	1	199.4	m0171	PZA00243.25
t116	1	202.4	m0175	PHM7616.35
t117	2	0	m0177	PZA00365.2
t118	2	0	m0178	PZA00680.3
t119	2	5.7	m0180	PZA02133.10
t120	2	5.7	m0181	PHM13440.13
t121	2	5.7	m0182	PZA00525.17
t122	2	6.4	m0183	PZA02681.8
t123	2	6.8	m0185	PZA00902.1
t124	2	10	m0188	PZA01211.1
t125	2	11.5	m0189	PZA00172.12
t126	2	11.5	m0190	PZA00613.22
t127	2	17.8	m0191	PZA02208.1
t128	2	18.3	m0192	PZA02081.1
t129	2	19.5	m0193	PZA01935.10
t130	2	22.6	m0194	PZA03747.1
t131	2	22.6	m0195	PZA03699.1
t132	2	27.6	m0196	PZB00901.4
t133	2	28.2	m0197	PZA02272.3
t134	2	29.8	m0198	PHM5822.15
t135	2	36.2	m0199	zfl2.9
t136	2	38.6	m0200	PZA00108.4
t137	2	40.6	m0201	PZA01753.1
t138	2	41.5	m0202	PZA02337.4
t139	2	49.8	m0205	PZA00497.4
t140	2	50.8	m0206	PZA03228.4
t141	2	52	m0207	PZA03634.1
t142	2	53.3	m0208	PHM6111.5
t143	2	53.3	m0209	PZA00590.1
t144	2	53.4	m0210	PZA01879.1
t145	2	56.9	m0214	PZA01755.1
t146	2	58.8	m0215	PZA03568.1
t147	2	62.2	m0218	PZA01336.1
t148	2	63	m0219	PZA02058.1
t149	2	64.2	m0221	PZA01993.7
t150	2	67.9	m0222	PZA02496.1
t151	2	67.9	m0223	PHM10404.8
t152	2	71.3	m0227	PZA02774.1
t153	2	72.1	m0228	PZA03629.1
t154	2	72.1	m0229	PZA02168.1
t155	2	73.6	m0231	PZA02279.1
t156	2	74.8	m0232	PHM3457.6
t157	2	74.8	m0233	PHM10321.11
t158	2	76.3	m0234	PZA01902.1
t159	2	76.5	m0235	PHM13360.13
t160	2	76.5	m0237	PZA02549.3
t161	2	77.1	m0238	PZA00485.2
t162	2	79.8	m0241	PZA00029.17
t163	2	80.6	m0242	PZA03211.6
t164	2	80.7	m0243	PZA01280.2
t165	2	81.2	m0244	PZA01537.2
t166	2	81.7	m0245	PZA01232.1
t167	2	81.7	m0246	PZA02939.10
t168	2	82.8	m0248	PZA01321.1
t169	2	83.1	m0249	PZA02371.6
t170	2	84	m0251	PZA01638.1
t171	2	84	m0254	PZA00495.5
t172	2	84.2	m0255	PZA03644.1
t173	2	85.5	m0257	PZA03659.1
t174	2	90.1	m0259	PZA03184.2
t175	2	103.7	m0264	PHM3055.9
t176	2	105.3	m0265	PZA00824.2
t177	2	106.2	m0267	PZA02017.1
t178	2	106.3	m0268	PHM7953.11
t179	2	106.5	m0269	PZA00803.3
t180	2	107.5	m0271	PHM16125.47
t181	2	109.9	m0274	PZA03165.1
t182	2	115.3	m0276	PZA02077.1
t183	2	117.5	m0279	PZA02964.7
t184	2	120.5	m0281	PZA03602.1
t185	2	122.1	m0282	PZA02456.1
t186	2	123.9	m0283	PZA00804.1
t187	2	125.9	m0284	PZA02680.1
t188	2	127.3	m0285	PZA02471.5
t189	2	129.8	m0287	PZA00527.10
t190	2	132.9	m0289	PZA02453.1
t191	2	134.3	m0290	PZA00163.4
t192	2	134.3	m0291	PZA01991.3
t193	2	135.1	m0292	PZA02564.2
t194	2	136.3	m0293	PZB01013.1
t195	2	139.7	m0294	PZA02266.3
t196	2	139.8	m0295	PZA01895.1
t197	2	141.3	m0296	PZA01352.5
t198	2	142.7	m0297	PZA02727.1
t199	2	152.5	m0299	PHM3094.23
t200	2	153.4	m0300	PZA03321.4
t201	2	154.9	m0301	PZA03577.1
t202	3	0	m0303	PZA00309.1
t203	3	15	m0304	PZA02090.1
t204	3	18.2	m0305	PZD00038.2
t205	3	20.1	m0306	PZA02678.1
t206	3	20.5	m0307	PZA00100.10
t207	3	22.5	m0309	PZA03527.1
t208	3	25.7	m0311	PZA00749.1
t209	3	28.9	m0312	PZB01944.1
t210	3	29.7	m0313	PZA02098.2
t211	3	33.7	m0314	PZA01765.1
t212	3	38.3	m0315	PZA00508.2
t213	3	38.3	m0316	PHM4204.69
t214	3	50.2	m0317	PHM4145.18
t215	3	54.7	m0321	PZA03054.5
t216	3	54.8	m0322	PZA01473.1
t217	3	55.5	m0325	zb21.1
t218	3	55.5	m0326	PZA00297.2
t219	3	55.5	m0327	PZA00380.10
t220	3	56	m0331	PHM15899.9
t221	3	56.9	m0333	PZA00279.2
t222	3	57.1	m0335	PZA01447.1
t223	3	57.6	m0337	PZA02589.1
t224	3	57.6	m0338	PZA00265.6
t225	3	57.7	m0339	PZA00509.1
t226	3	58	m0342	PZA02134.3
t227	3	58.3	m0345	PZA02645.2
t228	3	58.9	m0346	PZA00707.9
t229	3	59.7	m0347	PZA02619.1
t230	3	60.5	m0348	PZA03198.3
t231	3	61.2	m0351	PZA02299.16
t232	3	63.9	m0357	PZA02474.1
t233	3	64.1	m0358	PZA00920.1
t234	3	65.4	m0360	PZB02044.1
t235	3	67.2	m0362	PZA01934.6
t236	3	67.2	m0363	PHM4955.12
t237	3	68.9	m0364	PZA00827.1
t238	3	70.6	m0366	PZB02179.1
t239	3	70.6	m0367	PZA00828.2
t240	3	72.9	m0368	PHM9914.11
t241	3	75.9	m0370	PZA01396.1
t242	3	77	m0372	PZA00186.4
t243	3	77.4	m0373	PHM2885.31
t244	3	79.3	m0374	PZA03073.26
t245	3	79.3	m0375	PHM1959.26
t246	3	80.8	m0376	PZD00027.2
t247	3	82.1	m0378	PZA03032.19
t248	3	82.3	m0379	PZA00783.1
t249	3	84	m0380	PZA01726.1
t250	3	84.6	m0381	PZA02212.1
t251	3	90	m0382	PZA01962.12
t252	3	90	m0383	PHM17210.5
t253	3	90.1	m0384	PZA02654.3
t254	3	92.6	m0385	PHM1675.29
t255	3	92.6	m0386	PZA03733.1
t256	3	92.6	m0387	PZA03735.1
t257	3	96.7	m0388	PZA03191.1
t258	3	96.7	m0389	zb27.1
t259	3	97.8	m0391	PZA00494.2
t260	3	100.6	m0395	PZA03744.1
t261	3	100.8	m0396	PHM13673.53
t262	3	101.4	m0397	PZA03255.1
t263	3	103.2	m0399	PZA01035.1
t264	3	104	m0401	PZA01457.1
t265	3	105	m0402	PZA02122.9
t266	3	106.3	m0403	PZA01501.1
t267	3	107.7	m0404	PZA00892.5
t268	3	109.2	m0405	PZA03154.4
t269	3	111.2	m0406	PZA02733.1
t270	3	115.8	m0407	PZA00538.15
t271	3	128.4	m0412	sh2.21
t272	3	129.8	m0413	PZA00750.1
t273	3	132.8	m0416	PZA02665.2
t274	3	132.8	m0417	PZA01233.1
t275	3	132.8	m0418	PZA02514.1
t276	3	133	m0419	PZA02824.4
t277	3	134.6	m0420	PZA02668.2
t278	3	136.8	m0421	PHM2672.19
t279	3	136.8	m0422	PZA00219.7
t280	3	136.8	m0423	PZA03391.1
t281	3	145.1	m0425	PZA00316.10
t282	3	145.3	m0426	PZA01688.3
t283	3	146	m0428	PZA01360.3
t284	3	152.4	m0430	PHM2423.33
t285	3	154.7	m0431	PZA00088.3
t286	4	0.1	m0434	PZA03227.1
t287	4	7.2	m0435	PHM1184.26
t288	4	12.2	m0436	PHM2438.28
t289	4	19.4	m0437	PHM3301.28
t290	4	25.9	m0440	PZA00975.1
t291	4	31.6	m0441	PZA02358.1
t292	4	33.8	m0442	PZA02138.1
t293	4	33.9	m0443	PZA01122.1
t294	4	40.4	m0445	PHM8527.2
t295	4	43.9	m0446	PZA00139.4
t296	4	47.7	m0447	PZA01422.3
t297	4	49.4	m0449	PZA02002.1
t298	4	49.4	m0450	PZA02457.1
t299	4	52.1	m0451	PHM15427.11
t300	4	52.1	m0452	PZA02705.1
t301	4	52.8	m0453	PZA01106.3
t302	4	52.8	m0458	PZA03247.1
t303	4	53.4	m0459	PZA03385.1
t304	4	53.7	m0460	PZA01751.2
t305	4	55.2	m0461	PZA00445.22
t306	4	55.4	m0462	PZA01759.1
t307	4	56	m0467	PZA03254.1
t308	4	56	m0468	PZA03587.1
t309	4	56.3	m0470	PZA03270.2
t310	4	57.4	m0474	PZA03203.2
t311	4	57.7	m0475	PZA00104.1
t312	4	57.9	m0476	PZA03231.1
t313	4	58.3	m0477	PZB00093.7
t314	4	58.6	m0478	PZA03409.1
t315	4	58.8	m0480	fea2.3
t316	4	58.8	m0481	PZA02027.1
t317	4	58.9	m0482	PZA03459.1
t318	4	60.6	m0483	PZA02147.1
t319	4	61.8	m0484	PZA03152.3
t320	4	62	m0486	PZA02992.15
t321	4	65.9	m0487	PZA00057.2
t322	4	69.8	m0488	PZA01926.1
t323	4	75.3	m0489	PZA03116.1
t324	4	76.2	m0490	PZA00453.2
t325	4	77.2	m0491	PZA01289.1
t326	4	81.6	m0494	PZA01477.3
t327	4	81.7	m0495	PZA01658.1
t328	4	85.2	m0497	PZA03275.1
t329	4	89.1	m0498	PZA01187.1
t330	4	90.7	m0499	PZD00030.2
t331	4	92.7	m0500	PHM3637.14
t332	4	93.2	m0503	PZA02289.2
t333	4	97.9	m0504	PZA01766.1
t334	4	98.3	m0505	PZA01954.1
t335	4	101.3	m0507	PZA00344.10
t336	4	102.6	m0508	PZB01461.1
t337	4	102.9	m0509	PZA00332.5
t338	4	105	m0510	PHM4348.16
t339	4	106.7	m0512	PZA01790.1
t340	4	107.4	m0514	PZA01810.2
t341	4	107.9	m0515	PZA01566.1
t342	4	108.1	m0516	PZA02421.1
t343	4	108.7	m0518	PZA02779.1
t344	4	110.4	m0520	PZA03081.1
t345	4	110.6	m0521	PZB01021.1
t346	4	111.3	m0522	PZA02479.1
t347	4	111.5	m0523	PZA00155.1
t348	4	112.5	m0526	PZA01367.2
t349	4	112.5	m0527	PZA00878.2
t350	4	115.2	m0528	PZA00521.3
t351	4	116.1	m0529	PZA00694.6
t352	4	118.4	m0530	PZA02151.3
t353	4	118.9	m0531	PZA00513.1
t354	4	119.6	m0532	PHM5599.20
t355	4	124.5	m0535	PZA00529.4
t356	4	128.1	m0537	PZA03322.3
t357	4	138.1	m0541	PZA02239.12
t358	4	139.7	m0542	PZA00682.17
t359	4	141.1	m0543	PZA00282.19
t360	5	0	m0544	PZA01887.1
t361	5	0.1	m0545	PZA02367.1
t362	5	0.2	m0546	PZA01983.1
t363	5	0.6	m0547	PZA00818.1
t364	5	7.2	m0549	PZA01438.1
t365	5	10.9	m0552	PZA01570.1
t366	5	13.3	m0553	PHM13122.43
t367	5	22.1	m0554	PZA02653.12
t368	5	26	m0556	PZB00054.3
t369	5	27.5	m0557	PZA02753.1
t370	5	28.4	m0558	PHM3137.17
t371	5	30.2	m0559	PZB00094.1
t372	5	30.4	m0562	PZA01925.1
t373	5	30.8	m0563	PZA00865.1
t374	5	37.9	m0565	PZA01284.6
t375	5	37.9	m0566	PZA03092.7
t376	5	41.5	m0567	PZA00112.5
t377	5	45.4	m0569	PZA01327.1
t378	5	47	m0571	PZA01523.1
t379	5	49	m0572	PZA00517.7
t380	5	50.8	m0573	PZA03226.3
t381	5	51.8	m0575	PZA02792.25
t382	5	53.6	m0576	PZA01427.1
t383	5	53.9	m0577	PHM565.31
t384	5	56.1	m0578	PZA00934.2
t385	5	57.3	m0580	PZA00801.1
t386	5	57.5	m0581	PZB00869.4
t387	5	57.6	m0582	PZA01563.1
t388	5	58	m0585	PHM16854.3
t389	5	58.3	m0586	PZA00981.3
t390	5	58.3	m0587	PHM3691.18
t391	5	58.4	m0590	PHM12992.5
t392	5	60.6	m0591	PZA02207.1
t393	5	62.3	m0592	PZA00805.1
t394	5	62.6	m0595	PZA00222.7
t395	5	63	m0596	PHM1870.20
t396	5	63.2	m0598	PZA02676.2
t397	5	63.5	m0599	PZB01115.3
t398	5	64	m0601	PZB00232.2
t399	5	64	m0602	PZA01050.1
t400	5	65	m0604	PZB01112.1
t401	5	65.4	m0605	PZA01349.2
t402	5	65.5	m0606	PZA02525.1
t403	5	65.9	m0607	PZA03677.1
t404	5	65.9	m0608	PHM5798.39
t405	5	66	m0609	PZA01303.1
t406	5	66.8	m0611	PZA02862.3
t407	5	67.5	m0612	PZA02818.6
t408	5	68.1	m0613	PZA01779.1
t409	5	68.7	m0614	PZA00273.5
t410	5	68.7	m0615	PZA01693.1
t411	5	69.5	m0616	PZA03049.24
t412	5	70	m0618	PZA00881.1
t413	5	70	m0619	PZA02164.16
t414	5	72.5	m0621	PZA00067.10
t415	5	74.8	m0623	PZA01608.1
t416	5	75.6	m0624	PZA01796.1
t417	5	76.9	m0625	PZA00148.3
t418	5	78.4	m0626	PZA02981.2
t419	5	79.7	m0627	ae1.7
t420	5	79.8	m0628	PZA01763.2
t421	5	80.7	m0629	PZA02641.2
t422	5	80.7	m0630	PZA03536.1
t423	5	81.7	m0632	PZA00255.14
t424	5	83.3	m0633	PZA02040.2
t425	5	83.4	m0634	PZA00300.14
t426	5	84	m0635	PZA00987.1
t427	5	87.2	m0637	PZA03717.1
t428	5	87.2	m0638	PZA03714.1
t429	5	89.1	m0639	PZA01304.1
t430	5	90.2	m0641	PZA02633.4
t431	5	90.6	m0642	PZA02408.2
t432	5	90.6	m0644	PZA02356.7
t433	5	90.6	m0645	PHM5296.6
t434	5	90.8	m0646	PZA03324.1
t435	5	91.1	m0647	PZA01575.1
t436	5	91.9	m0648	PZA03452.6
t437	5	98.2	m0649	PZA03172.3
t438	5	99.5	m0652	PZA02751.1
t439	5	100.2	m0654	PZA00352.23
t440	5	101.2	m0655	PZA02426.1
t441	5	101.5	m0656	PZA02411.3
t442	5	101.9	m0657	PHM532.23
t443	5	106.4	m0659	PZA03024.16
t444	5	107	m0660	PZA01142.4
t445	5	108.8	m0661	PZA02820.17
t446	5	109	m0662	PZA01265.1
t447	5	110.1	m0663	PZB00765.1
t448	5	110.7	m0666	PZA02667.1
t449	5	110.9	m0667	PZA00395.2
t450	5	114.3	m0670	PZA00980.1
t451	5	123.1	m0672	PZA00545.26
t452	5	124.9	m0673	PZA02015.11
t453	5	125.2	m0674	PZA03167.5
t454	5	126.4	m0675	PZA01259.1
t455	5	127.2	m0676	PZA01680.3
t456	5	138	m0679	PZA02390.1
t457	5	153.3	m0681	PZA02769.1
t458	5	153.4	m0682	PZA01060.1
t459	6	0	m0683	PHM15961.13
t460	6	6.9	m0685	PZA03047.12
t461	6	7.1	m0686	PZA00440.1
t462	6	7.1	m0686.1	PZA00440.15
t463	6	7.8	m0687	PZA02948.24
t464	6	7.8	m0688	PZA03063.21
t465	6	8.1	m0689	PZA01901.1
t466	6	8.2	m0690	PZA01509.1
t467	6	11.1	m0695	PZA00427.3
t468	6	11.7	m0697	PZA03069.8
t469	6	12.4	m0699	PZD00072.2
t470	6	12.9	m0700	PZB01009.2
t471	6	13.1	m0702	PZA00006.17
t472	6	18.6	m0703	PHM8909.12
t473	6	18.6	m0704	PZA00214.1
t474	6	22.1	m0705	PZA03488.1
t475	6	27.8	m0706	PZA00942.2
t476	6	33.4	m0708	PZA03461.1
t477	6	41.5	m0710	PZA02048.2
t478	6	41.5	m0711	PZA02396.14
t479	6	42.1	m0712	PZA01589.2
t480	6	43.4	m0713	PZA01736.1
t481	6	43.7	m0714	PZA00382.17
t482	6	44.4	m0715	PZA01055.1
t483	6	44.6	m0717	PZA00571.1
t484	6	45.7	m0718	PZA01729.1
t485	6	45.9	m0720	PZA00473.5
t486	6	46.3	m0721	PZA01591.1
t487	6	48	m0722	PZA01552.1
t488	6	48	m0723	PZA01618.2
t489	6	50.7	m0725	PZA01884.1
t490	6	52.5	m0726	PZA00357.19
t491	6	52.5	m0727	PZA02262.3
t492	6	55.7	m0731	PZA02673.1
t493	6	56.6	m0733	PZB00942.1
t494	6	58.2	m0736	PZA02247.1
t495	6	59.5	m0738	PZA01144.1
t496	6	61.4	m0739	PZA01342.2
t497	6	70.4	m0741	PZA01672.1
t498	6	72.3	m0742	PZA01462.1
t499	6	75.1	m0743	PZA03027.12
t500	6	86.2	m0747	PZB01569.7
t501	6	86.5	m0748	PHM4503.25
t502	6	86.7	m0749	PZA00266.7
t503	6	86.8	m0750	PZA01468.1
t504	6	94	m0751	PHM7922.8
t505	6	94.1	m0752	PZA00889.2
t506	6	95.7	m0753	PZA00821.1
t507	6	96.4	m0754	PZA02688.2
t508	6	97.3	m0755	PZB01222.1
t509	6	101	m0756	PZA02141.1
t510	6	106.6	m0757	PZA00910.1
t511	6	108.2	m0758	PZA01875.1
t512	6	108.3	m0759	PHM4468.13
t513	6	109.7	m0760	PZA02815.25
t514	7	28.4	m0765	PZA01909.1
t515	7	43.9	m0767	PZA00256.27
t516	7	44.7	m0769	PZA03624.1
t517	7	45.8	m0770	PZA03344.2
t518	7	47.8	m0771	PHM15501.9
t519	7	48.1	m0772	PZA00132.17
t520	7	49.1	m0775	PZA00084.2
t521	7	49.1	m0781	PZA01445.1
t522	7	49.2	m0786	PHM904.21
t523	7	49.5	m0788	PZA02291.1
t524	7	50.7	m0792	PZA01933.3
t525	7	51.2	m0793	PZA02236.1
t526	7	61.4	m0794	PZA02365.7
t527	7	63.4	m0796	PZA01690.7
t528	7	63.7	m0797	PZA01946.7
t529	7	63.7	m0798	PZA00986.1
t530	7	64.9	m0799	PZA02352.1
t531	7	69.8	m0800	PZA02643.1
t532	7	71.5	m0804	PZD00054.1
t533	7	72.7	m0806	PZA00740.3
t534	7	72.7	m0807	PZA00111.10
t535	7	73.3	m0808	PZA02449.13
t536	7	73.4	m0809	PZA02984.10
t537	7	75.3	m0810	PZA03728.1
t538	7	76.5	m0812	PZA02854.13
t539	7	76.5	m0813	PHM9162.135
t540	7	77	m0814	PZA00405.7
t541	7	81.2	m0816	PZA02722.1
t542	7	89.4	m0817	PZA03176.4
t543	7	105.2	m0821	PZA00795.1
t544	7	110.7	m0822	PZA02373.1
t545	7	111.8	m0823	PHM7898.10
t546	7	112.2	m0824	PZA02223.2
t547	7	112.3	m0825	PHM10225.15
t548	7	112.7	m0826	PZA01533.2
t549	7	113.4	m0827	PZA00505.6
t550	7	115.4	m0829	PZA01414.1
t551	7	117.6	m0830	PZA01028.2
t552	7	117.8	m0831	PZA00386.4
t553	7	120.4	m0832	PZA00695.3
t554	7	120.8	m0833	PZB00605.1
t555	7	134	m0835	PZA01744.1
t556	7	134.1	m0836	PZA00424.1
t557	7	134.4	m0837	PZA01044.1
t558	7	135	m0838	PZA02274.1
t559	8	0	m0839	PZA02388.1
t560	8	9.8	m0840	PZA02174.2
t561	8	14.8	m0842	PZA01623.3
t562	8	17.1	m0843	PZA00368.1
t563	8	18.3	m0845	PHM4711.14
t564	8	21.2	m0847	PZA01601.1
t565	8	32.3	m0851	PZA01951.1
t566	8	36.4	m0852	PZA01079.1
t567	8	37.1	m0853	PZA02955.3
t568	8	41.7	m0855	PZA02528.1
t569	8	47.4	m0857	PHM1978.111
t570	8	48.6	m0859	PZA01186.1
t571	8	49.9	m0860	PZA00758.1
t572	8	50	m0861	PHM2350.17
t573	8	52.4	m0864	PZA01209.1
t574	8	52.4	m0865	PZA02203.1
t575	8	52.7	m0866	PZA00793.2
t576	8	53.4	m0871	PHM11114.7
t577	8	53.9	m0872	PZA01470.1
t578	8	54.8	m0875	PZA02522.1
t579	8	54.8	m0876	PZA01297.1
t580	8	57.5	m0879	PZA00908.2
t581	8	57.7	m0880	PZA03135.1
t582	8	59.7	m0884	PZA00739.1
t583	8	61.3	m0885	PZA01972.14
t584	8	61.5	m0886	PZA02566.1
t585	8	61.9	m0887	PZA01072.1
t586	8	62.3	m0888	PZA03012.7
t587	8	63.3	m0889	PHM934.19
t588	8	63.5	m0890	PZA02748.3
t589	8	64.1	m0891	PZA03638.1
t590	8	64.1	m0892	PZA03639.1
t591	8	64.1	m0893	PZA03637.1
t592	8	64.2	m0894	PHM3993.28
t593	8	66.9	m0895	PZB02155.1
t594	8	67.3	m0897	PHM10525.11
t595	8	67.4	m0898	PZA00118.1
t596	8	68	m0899	PZA03612.2
t597	8	68	m0901	PHM5468.25
t598	8	69.8	m0907	PHM448.23
t599	8	69.8	m0908	PZA00766.1
t600	8	74.3	m0911	PZA00429.1
t601	8	76.1	m0912	PZA03651.1
t602	8	76.1	m0913	PZA03650.1
t603	8	80.2	m0914	PHM4757.14
t604	8	81.6	m0916	PZA00951.1
t605	8	82	m0917	PHM12749.13
t606	8	82.3	m0918	PHM15278.6
t607	8	82.4	m0919	PZA03698.1
t608	8	82.6	m0920	PZA01741.1
t609	8	88.2	m0922	PHM3465.6
t610	8	88.5	m0923	PZA00706.16
t611	8	88.5	m0924	PHM15623.10
t612	8	91.3	m0926	PZA00675.1
t613	8	92.1	m0927	PHM1834.47
t614	8	94.1	m0928	PZA02746.2
t615	8	99	m0932	PZA01316.1
t616	8	103.7	m0934	PZA00904.1
t617	8	117.5	m0936	PHM14046.9
t618	8	119	m0937	PZA00189.23
t619	8	125	m0939	PZA00760.1
t620	8	127.4	m0940	PHM2749.10
t621	8	127.9	m0941	PZA01290.1
t622	8	128.4	m0943	PZA02281.3
t623	8	129.8	m0944	PZA00071.2
t624	9	0	m0945	PHM3925.79
t625	9	14.6	m0947	PZA01799.1
t626	9	18.6	m0949	sh1.11
t627	9	18.7	m0950	PZA01195.3
t628	9	20.7	m0951	PZA00466.1
t629	9	21	m0952	PZA01386.3
t630	9	26.8	m0954	PHM5181.10
t631	9	28.5	m0955	PZA02702.1
t632	9	30.4	m0956	PZA03416.7
t633	9	32.6	m0958	PZA00860.1
t634	9	39.4	m0962	ZHD1.1
t635	9	40	m0963	PZB00540.3
t636	9	40	m0964	PZA01999.3
t637	9	42.8	m0969	PZA02648.2
t638	9	44.5	m0970	PZB00959.1
t639	9	44.5	m0971	PZA00693.3
t640	9	45.2	m0973	PZA02878.13
t641	9	45.3	m0975	PZA00589.10
t642	9	45.4	m0976	PZB00014.1
t643	9	45.9	m0977	PZA03057.3
t644	9	46.6	m0981	PZA01861.1
t645	9	47	m0982	PZA01062.1
t646	9	47	m0983	PZA02545.1
t647	9	47.2	m0984	PZA03596.1
t648	9	49.5	m0987	PZB01899.1
t649	9	53.1	m0989	PZA00152.1
t650	9	53.1	m0990	PZB01358.1
t651	9	54.7	m0992	PZA03470.1
t652	9	56.7	m0993	PZA03235.1
t653	9	57.3	m0994	PZA02613.1
t654	9	58.1	m0996	PZA01819.1
t655	9	62.2	m0998	PZA00060.2
t656	9	62.9	m0999	PZA00213.19
t657	9	63.3	m1000	PHM3330.25
t658	9	64.3	m1001	PHM4905.6
t659	9	64.3	m1002	PZA01866.1
t660	9	64.5	m1003	PZA02397.1
t661	9	65.4	m1004	PZA02111.1
t662	9	67	m1007	PZA02235.14
t663	9	69.4	m1008	PZA01096.1
t664	9	74	m1009	PHM1766.1
t665	9	74.2	m1010	PZA02252.2
t666	9	87.3	m1012	PHM816.29
t667	9	87.9	m1014	PZB00221.3
t668	9	87.9	m1015	PZD00055.1
t669	9	88.4	m1016	PZA02197.1
t670	9	88.5	m1017	PZA00323.3
t671	9	89.3	m1018	PHM4604.18
t672	9	89.4	m1019	PZA01715.1
t673	9	94.8	m1022	PZA00912.2
t674	9	98.2	m1023	PHM4303.16
t675	9	101.2	m1024	PZA00832.1
t676	9	103	m1026	PZA00708.3
t677	9	107.6	m1028	PHM13681.12
t678	9	114.8	m1029	PZA03573.1
t679	10	0	m1030	PZA02554.1
t680	10	0.2	m1031	PZA02221.20
t681	10	8.9	m1033	PHM3631.47
t682	10	21.3	m1035	PHM2828.83
t683	10	24	m1036	PHM3765.7
t684	10	25	m1038	PZA01451.1
t685	10	28.5	m1040	PHM15331.16
t686	10	32.4	m1042	PZA01642.1
t687	10	32.4	m1043	PHM3896.9
t688	10	33.3	m1044	PZA02961.6
t689	10	33.8	m1045	PHM3922.32
t690	10	33.9	m1046	PZA00079.1
t691	10	33.9	m1047	PZA02470.2
t692	10	35.8	m1048	PZA02853.11
t693	10	36.2	m1050	PZA03491.1
t694	10	36.5	m1051	PZA01597.1
t695	10	36.5	m1052	PZA00409.17
t696	10	36.9	m1053	PZA01677.1
t697	10	36.9	m1056	PHM2770.19
t698	10	38.6	m1057	PZA01877.2
t699	10	40.8	m1060	PHM12990.15
t700	10	43	m1064	PZA00400.3
t701	10	43.4	m1065	PZA02398.2
t702	10	43.4	m1066	PHM537.22
t703	10	43.8	m1068	PHM18195.6
t704	10	44.3	m1070	PZA01292.1
t705	10	44.8	m1072	PZA02128.3
t706	10	46.7	m1073	PZA01089.1
t707	10	46.7	m1074	PHM4341.42
t708	10	47.1	m1075	PZA02219.2
t709	10	47.1	m1076	PHM13687.14
t710	10	47.6	m1077	PZA01141.1
t711	10	48	m1078	PZA03713.1
t712	10	48.8	m1079	PZA03196.1
t713	10	49	m1080	PZA00866.2
t714	10	49.2	m1081	PZA01005.1
t715	10	53.2	m1083	PZA01241.2
t716	10	58.4	m1085	PZB01111.8
t717	10	64.5	m1088	PHM15868.56
t718	10	64.8	m1089	PZA02663.1
t719	10	69.2	m1090	PZA01995.2
t720	10	75.4	m1094	PZA03606.1
t721	10	75.4	m1095	PZA03607.1
t722	10	81.6	m1098	PZA02049.1
t723	10	82.1	m1099	PZA00007.1
t724	10	83.2	m1101	PZA01073.1
t725	10	85.3	m1102	PZA02167.2
t726	10	91	m1103	PZA01001.2
t727	10	93.7	m1105	PZA00062.4
t728	10	101.9	m1106	PZA02527.2
acM positions and marker number are based on the NAM composite map (McMullen et al, 2009)
