# Supplementary material for: Genetic Analysis of Kernel Traits in Maize-Teosinte Introgression Populations
Source: G3 (Bethesda). 2016 Jun 9;6(8):2523–30. doi: 10.1534/g3.116.030155 (PMC4978905; doi:10.1534/g3.116.030155)
Supplement: Supplemental Material [file supp_g3.116.030155_TableS2.xlsx]

## Sheet: Table S2
Table S2. LSMeans for kernel traits (xlsx).
Pedigree	Pop	Entry	Wt50k (g)	FFD (kg/m2)	Area (mm2)	Perimeter (mm)	Roundness (%)	Width (mm)	Length (mm)	L/W	PC1	PC2	PC3
Z035E0001	Z035	1	12.9669	4.06411	63.4966	33.3612	82.0942	6.87772	11.3044	1.64587	42.6727	55.448	-26.4904
Z035E0002	Z035	2	13.8406	4.54056	61.0146	33.0367	80.9559	6.61194	11.2545	1.70594	41.8675	54.8017	-24.9452
Z035E0003	Z035	3	14.7676	4.90794	60.7559	32.3134	83.3873	6.89688	10.9278	1.58717	41.1866	56.696	-24.6789
Z035E0004	Z035	4	13.5775	4.32183	62.6692	33.436	81.9392	6.81142	11.2209	1.65056	42.5532	55.4985	-25.8544
Z035E0005	Z035	5	13.1847	4.55868	57.8278	32.3304	80.0614	6.40302	11.1293	1.74398	39.8226	53.6925	-24.1557
Z035E0006	Z035	6	13.8973	4.8024	57.9011	32.0635	82.7867	6.67065	10.7638	1.61986	39.3446	55.6779	-24.2404
Z035E0007	Z035	7	13.105	4.48392	58.3061	32.5764	79.2832	6.30828	11.2827	1.80263	40.3519	53.1846	-24.215
Z035E0008	Z035	8	12.4499	4.46012	55.9969	31.9843	80.0672	6.26126	10.9603	1.75594	38.3671	53.2082	-24.0012
Z035E0009	Z035	9	11.2144	4.06693	55.1478	30.3283	83.0712	6.50748	10.3702	1.59646	35.7748	54.5658	-24.9258
Z035E0010	Z035	10	13.8854	4.7137	58.7721	32.1538	81.1447	6.58269	11.1061	1.69699	40.2816	54.7359	-24.2106
Z035E0011	Z035	11	13.5492	4.52488	59.7979	32.9322	79.2878	6.40021	11.4489	1.79455	41.5152	53.5105	-24.4318
Z035E0012	Z035	12	8.8362	3.55454	49.2801	29.6766	80.7241	5.98596	10.1919	1.70777	31.9618	51.5538	-24.2423
Z035E0013	Z035	13	12.605	4.29821	58.4432	32.5776	78.9852	6.23659	11.3273	1.82048	40.2722	52.7953	-24.4942
Z035E0014	Z035	14	13.4475	4.79984	56.4707	31.5446	81.7049	6.47344	10.7687	1.6636	38.4117	54.7028	-23.7722
Z035E0015	Z035	15	13.1769	4.36649	60.2835	32.8647	79.966	6.45869	11.3016	1.75253	41.3525	53.8512	-24.9161
Z035E0016	Z035	16	11.5359	4.28164	54.492	30.8829	81.3379	6.32877	10.6276	1.68241	36.3225	53.5423	-24.225
Z035E0017	Z035	17	13.5984	4.67929	57.2942	31.0621	84.3267	6.83399	10.396	1.52168	37.9741	56.512	-24.4894
Z035E0018	Z035	18	12.3139	4.12042	59.7681	32.804	80.3926	6.45001	11.2394	1.74542	40.5959	53.7117	-25.3635
Z035E0019	Z035	19	12.8009	4.54563	56.3781	31.2002	82.2954	6.46228	10.5146	1.62919	37.6737	54.8105	-24.2263
Z035E0020	Z035	20	12.4752	4.03933	59.7103	32.047	82.0613	6.78252	10.7817	1.59242	39.7562	54.9417	-25.6479
Z035E0021	Z035	21	12.5284	4.24305	59.0543	32.7916	79.6217	6.34374	11.242	1.77749	40.4817	53.2505	-24.8682
Z035E0022	Z035	22	13.9062	4.56493	62.2045	33.0782	80.4689	6.61213	11.4739	1.7396	42.6914	54.651	-25.0825
Z035E0023	Z035	23	12.4005	4.32385	57.3475	31.9995	79.895	6.27296	11.0783	1.77075	39.0851	53.1963	-24.3951
Z035E0024	Z035	24	12.4687	4.50943	55.2164	30.4286	82.0739	6.46745	10.5579	1.63915	36.6782	54.4551	-23.9823
Z035E0025	Z035	25	12.9945	4.02885	64.523	34.4692	79.2798	6.55515	11.768	1.79697	44.4503	53.7431	-26.2979
Z035E0026	Z035	26	13.3757	4.40192	61.0037	32.5151	81.4051	6.66369	11.2	1.68364	41.3041	54.9201	-25.2378
Z035E0027	Z035	27	12.509	4.38255	57.2418	31.7171	80.5202	6.35826	10.973	1.72716	38.7803	53.6496	-24.3839
Z035E0028	Z035	28	12.4406	4.17729	59.6319	32.7727	79.3957	6.33161	11.386	1.79973	40.8233	53.1108	-25.0327
Z035E0029	Z035	29	11.5501	4.38838	52.7285	29.7063	82.7973	6.36834	10.2577	1.61203	34.4464	54.2854	-23.8543
Z035E0030	Z035	30	11.9633	4.45127	53.776	31.2492	79.0129	6.03283	10.7396	1.79267	36.8158	52.1765	-23.3394
Z035E0031	Z035	31	12.8806	4.20113	61.2552	33.8692	80.8469	6.60558	11.2637	1.70988	42.0066	54.3801	-25.6948
Z035E0032	Z035	32	12.6973	4.35739	58.3615	31.9317	80.4963	6.4632	11.0581	1.71239	39.5603	53.8519	-24.6405
Z035E0033	Z035	33	7.5662	3.37145	44.9773	28.8163	81.0519	5.64906	9.6803	1.72249	28.5828	50.7513	-23.7258
Z035E0034	Z035	34	13.2513	4.47324	59.2412	32.252	80.9807	6.59683	11.1571	1.6935	40.3431	54.4513	-24.7165
Z035E0035	Z035	35	11.8229	4.46182	51.0654	29.5517	83.1903	6.30592	10.0875	1.60018	33.5152	54.4073	-23.3694
Z035E0036	Z035	36	13.1898	4.16124	63.3838	33.1189	81.9021	6.89779	11.3991	1.65488	42.6874	55.4165	-26.2539
Z035E0037	Z035	37	13.088	4.20426	62.2156	32.986	82.1052	6.78452	11.1395	1.64572	41.834	55.3721	-25.978
Z035E0038	Z035	38	10.7127	4.1753	51.2386	29.1106	83.4935	6.39076	9.9497	1.5637	32.8062	54.2815	-24.0374
Z035E0039	Z035	39	12.0072	4.14202	58.1943	31.9713	80.3203	6.40328	11.0888	1.7328	39.2486	53.4352	-24.9728
Z035E0040	Z035	40	14.363	4.73655	60.884	32.9016	81.617	6.67509	11.1937	1.67941	41.8091	55.3986	-24.6933
Z035E0041	Z035	41	13.2369	4.48115	59.2166	31.9049	80.7959	6.50774	11.1368	1.7116	40.1659	54.3067	-24.6005
Z035E0042	Z035	42	13.8088	4.39312	62.7822	33.5847	79.8785	6.6139	11.6658	1.76573	43.3795	54.2714	-25.352
Z035E0043	Z035	43	12.5158	4.34991	57.4371	31.8559	82.493	6.65149	10.7371	1.61783	38.4811	54.9443	-24.9
Z035E0044	Z035	44	12.4152	4.17782	60.4278	32.8297	80.9664	6.57079	11.1824	1.71066	40.8466	54.2234	-25.5624
Z035E0045	Z035	45	10.5486	4.18017	50.609	29.411	81.4398	6.11888	10.1902	1.66919	33.0714	52.8449	-23.5588
Z035E0046	Z035	46	11.6497	4.13576	56.3462	30.8364	82.4243	6.5886	10.6169	1.61433	37.0442	54.4831	-24.9662
Z035E0047	Z035	47	11.8114	4.17161	56.638	31.8145	80.6645	6.33926	10.86	1.7143	38.1569	53.4125	-24.6962
Z035E0048	Z035	48	13.2	4.26351	62.0542	33.46	82.504	6.82419	11.0801	1.62654	41.9341	55.6453	-26.0017
Z035E0049	Z035	49	11.311	4.33613	52.0144	29.597	84.8016	6.54156	9.8236	1.517	33.3659	55.3912	-24.2016
Z035E0050	Z035	50	13.0293	4.36002	59.7539	32.9341	79.2728	6.40712	11.4279	1.79347	41.2707	53.3094	-24.7341
Z035E0051	Z035	51	12.7308	4.50002	56.6638	32.1027	79.8582	6.22983	10.9903	1.76464	38.9077	53.2398	-23.9849
Z035E0052	Z035	52	11.8458	4.29687	55.1354	31.5431	78.9524	6.11804	11.0677	1.82403	37.7442	52.1832	-23.859
Z035E0053	Z035	53	12.3217	4.02602	61.2935	32.9819	81.3891	6.63863	11.1925	1.6888	41.2169	54.5155	-26.0194
Z035E0054	Z035	54	13.5263	4.67119	57.8148	32.1073	81.9516	6.632	10.9165	1.65232	39.4064	55.0188	-24.31
Z035E0055	Z035	55	11.4	4.27254	53.7232	31.2881	79.9109	6.23921	10.9406	1.75338	36.5292	52.5139	-23.9034
Z035E0056	Z035	56	11.5473	4.18529	55.1645	31.0071	83.2256	6.58092	10.366	1.57962	36.2368	54.812	-24.8617
Z035E0057	Z035	57	12.9979	4.34283	59.7332	32.5474	81.3077	6.57078	11.0884	1.69227	40.5052	54.5672	-25.0993
Z035E0058	Z035	58	11.8546	3.85488	61.2554	33.0446	81.7754	6.71858	11.0967	1.65343	40.9202	54.6054	-26.411
Z035E0059	Z035	59	12.1431	4.18013	58.11	32.1302	81.1325	6.37988	10.9025	1.71041	39.0791	53.9362	-25.0254
Z035E0060	Z035	60	11.7714	4.33744	54.268	30.6586	82.4246	6.49351	10.5747	1.63154	35.9901	54.2913	-24.2613
Z035E0061	Z035	61	12.4395	4.14975	59.7443	32.6345	81.069	6.55176	11.1465	1.70614	40.3905	54.1991	-25.4164
Z035E0062	Z035	63	12.9293	4.17544	61.7329	32.9582	82.1328	6.82332	11.2283	1.66541	41.5756	55.2692	-25.9664
Z035E0063	Z035	64	13.0941	4.34032	60.4565	33.0116	79.6203	6.40311	11.3992	1.78127	41.5797	53.596	-24.9466
Z035E0064	Z035	65	12.8469	4.29235	59.8414	31.903	82.5038	6.75311	10.8963	1.61486	39.8752	55.327	-25.3903
Z035E0065	Z035	66	12.1591	4.14794	58.6272	32.5065	80.3927	6.4296	11.1552	1.73543	39.8007	53.5588	-25.1033
Z035E0066	Z035	67	14.2933	4.72729	61.5896	32.957	80.963	6.6519	11.334	1.70509	42.342	55.0623	-24.7658
Z035E0067	Z035	68	12.1708	4.41876	55.1784	30.617	82.0964	6.44437	10.4189	1.61735	36.546	54.3745	-24.1704
Z035E0068	Z035	69	13.7905	4.64404	59.5385	32.9585	79.2152	6.35191	11.4597	1.80444	41.5188	53.5149	-24.1724
Z035E0069	Z035	70	12.5422	4.13544	60.6438	32.748	80.3725	6.54976	11.3905	1.73846	41.1772	53.8965	-25.4859
Z035E0070	Z035	71	12.5498	4.21785	59.4208	32.2225	82.0786	6.71479	10.9686	1.64129	39.8232	54.8968	-25.4219
Z035E0071	Z035	72	13.7142	4.4589	61.5	33.2616	79.3645	6.44571	11.5811	1.79842	42.6067	53.7667	-24.8673
Z035E0072	Z035	73	12.4723	4.46	55.8793	30.8275	82.2854	6.5745	10.6147	1.62032	37.1935	54.6745	-24.2902
Z035E0073	Z035	74	15.0331	4.48901	66.9485	33.5597	85.19	7.38011	11.0622	1.50396	44.6224	58.5499	-26.885
Z035E0074	Z035	75	13.265	4.57016	58.045	32.2738	79.1696	6.25439	11.2869	1.80969	40.1627	53.1398	-23.9569
Z035E0075	Z035	76	12.8515	4.14376	61.7548	32.9527	81.1754	6.67143	11.2609	1.68933	41.7264	54.6441	-25.8122
Z035E0076	Z035	77	12.7984	4.14766	61.6629	33.0487	81.0351	6.64827	11.3475	1.7073	41.7757	54.5076	-25.7909
Z029E0001	Z029	78	13.9592	4.39497	63.5589	33.7382	80.0361	6.70725	11.6355	1.73618	43.8557	54.5513	-25.543
Z029E0002	Z029	79	9.6251	4.3267	44.5519	26.9954	88.6375	6.55348	8.7213	1.33617	26.5355	56.4123	-23.4869
Z029E0003	Z029	80	13.4621	4.31279	62.5318	33.7264	79.2171	6.5711	11.7308	1.79014	43.3447	53.7238	-25.3758
Z029E0004	Z029	81	9.765	4.3608	44.7105	27.3355	85.3074	6.135	9.1192	1.48884	27.6252	54.364	-22.7913
Z029E0005	Z029	82	13.3267	4.97734	50.6948	29.171	87.7963	6.77395	9.3339	1.37525	32.5699	57.8593	-23.2307
Z029E0006	Z029	83	10.9343	4.23711	51.1491	30.4422	81.0395	6.09172	10.3464	1.70121	34.1444	52.7471	-23.5603
Z029E0007	Z029	84	12.3675	4.65835	52.9281	30.3364	81.0051	6.22203	10.5673	1.70182	35.6859	53.4894	-23.1316
Z029E0008	Z029	85	10.9248	3.9271	55.4794	30.7591	83.0329	6.56976	10.4716	1.59605	36.089	54.4651	-25.285
Z029E0009	Z029	86	13.8167	4.25911	64.8512	33.6143	81.3006	6.8307	11.5653	1.69495	44.0767	55.3847	-26.2163
Z029E0010	Z029	87	11.6529	4.10932	56.7785	30.9862	84.5473	6.82481	10.4596	1.53832	36.861	55.8265	-25.5365
Z029E0011	Z029	88	13.6975	4.44753	61.5298	32.7041	80.6919	6.64346	11.3474	1.70898	41.9932	54.656	-25.1027
Z029E0012	Z029	89	13.1675	4.42981	59.539	32.0189	83.8384	6.83758	10.6316	1.55717	39.5385	56.2451	-25.3699
Z029E0015	Z029	90	11.4655	4.32855	51.9668	29.6238	81.2009	6.10123	10.3306	1.6999	34.315	53.1261	-23.3957
Z029E0016	Z029	91	10.25	3.94272	51.626	29.722	82.0146	6.23779	10.1839	1.64189	33.4764	53.1791	-24.2509
Z029E0017	Z029	92	11.1542	3.80096	59.9488	32.4238	80.4463	6.53859	11.3042	1.73044	40.05	53.3836	-26.0496
Z029E0019	Z029	94	13.4388	4.1935	64.0682	33.7469	79.7249	6.65183	11.7275	1.76387	43.9788	54.1818	-25.9251
Z029E0020	Z029	95	12.6063	3.97733	63.2999	33.3622	80.9336	6.68955	11.466	1.71432	42.7079	54.5295	-26.3851
Z029E0021	Z029	96	10.62	4.01632	52.8343	29.5391	82.3318	6.36316	10.1551	1.59516	34.0595	53.7066	-24.3939
Z029E0022	Z029	97	13.8075	4.24767	64.939	33.9999	80.9835	6.86139	11.6327	1.69766	44.4068	55.216	-26.2576
Z029E0023	Z029	98	11.2729	4.2262	54.2844	30.6917	81.6026	6.3224	10.5429	1.6668	35.9228	53.591	-24.3324
Z029E0024	Z029	99	12.2904	4.156	57.0631	31.5815	84.2182	6.82055	10.5567	1.55261	37.6599	55.8421	-25.366
Z029E0025	Z029	100	12.8442	4.56172	56.232	30.9893	84.6315	6.8347	10.3351	1.51271	37.0309	56.3188	-24.6594
Z029E0026	Z029	101	13.4967	4.46012	60.5629	32.3313	86.0363	7.21875	10.5098	1.45561	39.8835	57.8792	-25.9918
Z029E0027	Z029	102	12.6125	4.19816	60.0696	33.2494	78.3929	6.28522	11.5466	1.84042	41.6106	52.6063	-24.9301
Z029E0028	Z029	103	13.6963	4.4296	61.8517	32.8571	82.078	6.83965	11.0868	1.62969	41.848	55.6003	-25.5029
Z029E0029	Z029	104	13.0296	4.67595	55.9611	31.6344	81.9125	6.53357	10.6258	1.62964	37.936	54.6692	-23.9731
Z029E0030	Z029	105	13.8025	4.74126	58.3094	31.7038	86.2193	7.06066	10.2736	1.46055	38.4583	57.8583	-25.0661
Z029E0031	Z029	106	12.4554	4.16272	59.8532	32.9289	77.6147	6.19801	11.7629	1.89923	41.5365	52.0083	-24.7647
Z029E0032	Z029	107	11.1413	4.22091	52.7294	30.3452	81.9368	6.31268	10.2665	1.62715	34.7517	53.6194	-24.0528
Z029E0033	Z029	108	12.115	4.25824	56.9249	31.9564	80.9813	6.55168	11.0181	1.6828	38.548	53.811	-24.7317
Z029E0034	Z029	109	12.1917	4.10573	59.349	32.5498	79.494	6.39029	11.4088	1.78727	40.4788	53.072	-25.1236
Z029E0035	Z029	110	11.1125	4.22368	52.6116	30.236	80.709	6.22619	10.6216	1.70882	35.0433	52.8025	-23.7879
Z029E0036	Z029	111	9.6375	4.10483	46.9095	28.8161	78.323	5.6084	10.3648	1.85121	31.2748	50.1264	-22.3596
Z029E0037	Z029	112	11.6325	4.52957	51.8036	29.9557	83.8731	6.44261	10.1404	1.57824	33.9081	54.8816	-23.7541
Z029E0038	Z029	113	11.7038	3.82443	61.2599	32.4639	79.6888	6.55529	11.4929	1.75248	41.1671	53.2595	-26.0068
Z029E0039	Z029	114	12.9283	4.48714	57.7447	32.7765	78.1337	6.1548	11.4549	1.86416	40.4005	52.323	-23.9368
Z029E0040	Z029	115	12.3475	4.18806	58.9689	32.5574	79.6597	6.49662	11.3887	1.75564	40.3469	53.2543	-24.9879
Z029E0041	Z029	116	12.8041	4.22374	60.3538	32.447	82.7752	6.84733	11.024	1.61836	40.3925	55.5084	-25.7231
Z029E0042	Z029	117	12.3392	4.04114	60.9795	32.5542	80.1276	6.56863	11.455	1.74714	41.2417	53.7168	-25.6427
Z029E0043	Z029	118	13.6525	4.30526	63.9125	33.3172	82.8779	7.01643	11.3088	1.61803	43.012	56.2562	-26.3206
Z029E0044	Z029	119	11.5958	4.14542	56.1981	31.2648	83.3248	6.68269	10.5467	1.58173	36.9627	54.9969	-25.1873
Z029E0045	Z029	120	14.2174	5.22356	52.5813	29.1475	89.5609	7.10197	9.3729	1.32037	33.5609	59.5144	-23.5309
Z029E0046	Z029	121	12.7463	4.05943	62.5919	33.1489	81.3679	6.71715	11.2877	1.68288	42.1565	54.8058	-26.1702
Z029E0047	Z029	122	12.5963	4.23296	59.5317	32.4375	81.2745	6.53863	11.0742	1.69712	40.1805	54.3668	-25.2522
Z029E0048	Z029	123	14.1329	4.5282	62.4057	33.0671	79.4618	6.53009	11.6775	1.78892	43.1604	54.0932	-24.8809
Z029E0049	Z029	124	12.555	4.12083	60.3227	32.2271	83.2802	6.87494	10.885	1.58316	39.9953	55.7311	-25.9501
Z029E0050	Z029	125	13.5233	4.61383	58.606	32.6445	78.0671	6.20244	11.5783	1.86847	41.0775	52.5939	-23.8022
Z029E0051	Z029	126	14.0138	4.33203	64.7045	34.1502	80.6669	6.79298	11.6268	1.7188	44.5052	55.0597	-26.0103
Z030E0001	Z030	127	12.7783	5.04219	50.6819	29.1534	83.1001	6.33644	10.1231	1.60079	33.6026	54.7721	-22.4279
Z030E0002	Z030	128	13.0938	4.10772	63.6481	33.3898	80.9802	6.81609	11.4949	1.6881	43.122	54.8392	-26.2408
Z030E0003	Z030	129	13.1417	4.18423	62.8715	33.3736	79.8818	6.59365	11.6118	1.76221	43.006	54.0389	-25.734
Z030E0005	Z030	131	11.1675	4.26566	52.4213	30.4164	78.0427	5.96972	10.8816	1.82561	35.6893	51.1662	-23.1799
Z030E0006	Z030	132	13.9	4.58058	60.7203	32.815	78.5831	6.35632	11.6424	1.83422	42.2729	53.2863	-24.3149
Z030E0007	Z030	133	13.1833	4.36877	60.38	32.1397	81.3168	6.63869	11.1031	1.67989	40.71	54.7503	-25.121
Z030E0008	Z030	134	13.7263	4.3234	63.441	33.4254	81.8011	6.89453	11.4307	1.65972	43.1253	55.5546	-25.9739
Z030E0009	Z030	135	13.575	4.51016	60.1749	32.4888	82.6581	6.75977	10.9092	1.61455	40.6019	55.7091	-25.1422
Z030E0010	Z030	136	15.099	4.74255	63.7716	33.1962	83.3953	7.05316	11.0723	1.5777	43.2783	57.1349	-25.5165
Z030E0011	Z030	137	13.2483	4.19719	63.1374	33.5472	79.6612	6.59674	11.4978	1.74413	43.2488	54.0164	-25.7281
Z030E0012	Z030	138	14.1167	4.53249	62.3752	32.9982	82.0602	6.80362	11.2254	1.65182	42.4055	55.7448	-25.394
Z030E0013	Z030	139	11.3167	4.13484	54.7896	31.0891	80.5717	6.29491	10.82	1.72325	36.7137	52.9904	-24.3724
Z030E0014	Z030	140	13.1225	4.47478	58.5148	32.0322	80.1603	6.42861	11.2074	1.74694	39.9975	53.7836	-24.3785
Z030E0015	Z030	141	12.7275	4.8135	53.0108	30.2789	80.3204	6.08897	10.6434	1.75155	36.0031	53.1829	-22.7298
Z030E0016	Z030	142	14.0033	4.83052	57.9458	31.4058	84.7981	6.98379	10.472	1.50118	38.5979	57.059	-24.5441
Z030E0017	Z030	143	9.2525	3.73253	49.5863	29.4271	80.9168	6.05824	10.2153	1.6869	32.1503	51.9071	-24.0446
Z030E0018	Z030	144	11.3117	4.11441	55.0154	30.9434	80.4698	6.27457	10.8547	1.73169	36.7804	52.9374	-24.3957
Z030E0019	Z030	145	12.6138	4.21992	59.5007	32.3714	80.8576	6.61638	11.2482	1.7017	40.3275	54.1477	-25.2008
Z030E0020	Z030	146	13.5808	4.39444	61.936	32.614	81.6358	6.81923	11.0518	1.62896	41.789	55.3346	-25.4731
Z030E0021	Z030	147	12.9075	4.4433	58.1232	31.8413	81.0797	6.58537	10.8824	1.65338	39.3101	54.3398	-24.5734
Z030E0022	Z030	148	12.5342	4.33421	57.7537	31.8238	83.6308	6.7919	10.5797	1.56008	38.3405	55.7092	-25.2077
Z030E0023	Z030	149	12.44	4.47614	55.6389	30.1345	84.3017	6.79548	10.0972	1.48704	36.1036	55.9882	-24.5513
Z030E0024	Z030	150	13.0675	4.22925	61.7501	32.8406	82.056	6.88998	11.1758	1.62177	41.5842	55.3519	-25.875
Z030E0025	Z030	151	12.1987	4.46955	54.4068	30.0751	83.1395	6.57457	10.387	1.58465	35.7284	54.952	-24.1025
Z030E0026	Z030	152	13.3717	4.55529	58.7014	32.0615	81.8413	6.69908	11.0642	1.6523	39.8457	54.9916	-24.6477
Z030E0027	Z030	153	12.4701	4.29283	56.5732	31.9467	80.6615	6.40537	10.9552	1.71639	38.5254	53.6356	-24.3989
Z030E0029	Z030	154	13.4813	4.47155	60.2146	32.2591	83.8912	6.92934	10.8204	1.57113	40.2102	56.4505	-25.4469
Z030E0030	Z030	155	14.2308	4.48972	63.6142	33.8732	80.4231	6.6927	11.5554	1.72963	43.9412	54.876	-25.4616
Z030E0031	Z030	156	11.3958	4.28868	52.9643	30.1881	81.1108	6.24908	10.5579	1.69061	35.1958	53.1881	-23.7816
Z030E0032	Z030	157	12.1986	4.29678	55.128	31.2851	82.7449	6.48924	10.4897	1.62311	36.7651	54.6767	-24.4665
Z030E0033	Z030	158	13.8475	4.28407	64.7269	33.6356	81.6402	6.90459	11.5102	1.66929	43.9604	55.6241	-26.2436
Z030E0034	Z030	159	10.9553	4.32299	50.7103	29.8111	84.4831	6.50384	9.8715	1.51791	32.7845	54.9358	-24.0234
Z030E0035	Z030	160	12.6238	4.4025	57.4319	32.0497	80.1879	6.43555	11.0964	1.72736	39.2259	53.5432	-24.386
Z030E0036	Z030	161	13.6242	4.35792	62.4623	33.4129	80.2211	6.66958	11.5695	1.737	42.9604	54.4145	-25.4282
Z030E0037	Z030	162	12.0329	4.23096	56.753	31.8517	78.5846	6.21519	11.3256	1.82275	38.9562	52.2056	-24.2128
Z030E0038	Z030	163	13.2967	4.31458	61.5571	32.4987	80.9396	6.71637	11.3642	1.69312	41.7096	54.6807	-25.3939
Z030E0039	Z030	164	13.565	4.96257	54.6371	30.1883	83.0507	6.51411	10.4463	1.60693	36.5083	55.4111	-23.2618
Z030E0040	Z030	165	12.7317	4.10658	62.005	33.0752	79.3273	6.54284	11.6444	1.7812	42.398	53.4707	-25.6021
Z030E0041	Z030	166	11.646	4.4831	52.4627	30.2175	80.165	6.00348	10.5528	1.76877	35.2278	52.6013	-23.1862
Z030E0042	Z030	167	12.6333	4.33347	58.2723	32.0959	80.7534	6.4877	11.0553	1.70548	39.5219	53.9652	-24.7375
Z030E0043	Z030	168	13.9617	4.62343	60.5686	33.3584	79.1528	6.44359	11.5369	1.79437	42.3416	53.6726	-24.4255
Z030E0044	Z030	169	13.9601	4.58826	60.8397	32.772	80.7032	6.59894	11.3333	1.72054	41.7945	54.6716	-24.7465
Z030E0045	Z030	170	12.59	4.22501	59.5657	32.7697	78.3767	6.30357	11.565	1.83516	41.1453	52.5564	-24.7483
Z030E0046	Z030	171	12.0267	4.2613	56.5194	30.6865	84.1738	6.71393	10.3329	1.53796	36.7391	55.7253	-25.0863
Z030E0047	Z030	172	12.8944	4.14135	62.2237	33.6439	81.6922	6.73068	11.2116	1.66644	42.1856	55.0213	-26.1003
Z030E0048	Z030	173	13.9738	4.28351	65.273	33.3461	84.4506	7.28319	11.0904	1.52826	43.4271	57.5433	-26.8735
Z030E0049	Z030	174	12.4475	4.4929	55.4971	31.3766	79.8375	6.21389	10.9848	1.76786	37.8828	53.0141	-23.7325
Z030E0050	Z030	175	12.3975	4.46223	55.4964	31.403	79.4243	6.20582	11.0244	1.78107	37.9767	52.754	-23.7048
Z030E0051	Z030	176	12.6383	4.15202	61.1163	33.3734	78.9938	6.44417	11.6191	1.80652	42.122	53.1176	-25.357
Z030E0053	Z030	178	12.3388	4.02009	61.4007	33.2276	81.0693	6.70939	11.3222	1.69306	41.5394	54.3658	-26.0464
Z030E0054	Z030	179	12.0354	4.24545	56.7133	31.7666	80.8651	6.42715	10.9223	1.71046	38.2743	53.6456	-24.6324
Z030E0055	Z030	180	14.2516	4.42178	64.6392	34.3845	80.2346	6.69159	11.6529	1.74167	44.7687	54.8488	-25.7671
Z030E0056	Z030	181	13.645	4.31202	63.286	32.5449	87.4229	7.4667	10.4017	1.39989	41.0515	59.0907	-26.9832
Z030E0057	Z030	182	13.2233	4.43329	59.6376	31.2084	87.9	7.35715	10.1374	1.37994	38.2491	58.8623	-26.1127
Z030E0058	Z030	183	9.6271	4.04401	47.5198	28.5079	80.9723	5.95456	10.0577	1.68956	30.7778	51.8867	-23.0692
Z030E0059	Z030	184	13.1425	4.48371	58.8174	32.4592	80.0083	6.4097	11.2164	1.75323	40.3899	53.7262	-24.4544
Z030E0060	Z030	185	12.8321	4.36638	59.0301	32.6218	78.7264	6.32513	11.4928	1.82983	40.8238	52.8177	-24.4795
Z030E0061	Z030	186	11.2688	4.24754	52.9762	30.5888	81.6406	6.30729	10.4608	1.65916	35.198	53.4768	-24.0242
Z030E0062	Z030	187	14.8354	4.58392	64.7371	33.539	83.0115	7.12467	11.3138	1.58915	44.0016	56.9016	-25.9532
Z030E0063	Z030	188	11.79	4.20409	55.9167	31.3322	80.9363	6.44766	10.8961	1.69393	37.5574	53.5388	-24.5422
Z031E0001	Z031	189	13.3179	4.19891	63.424	34.2237	79.502	6.59145	11.7341	1.7804	43.8932	53.9101	-25.8316
Z031E0002	Z031	190	13.14	4.17771	62.9001	33.5269	79.9269	6.6118	11.629	1.76607	43.0976	54.0645	-25.78
Z031E0003	Z031	191	12.0333	4.08299	58.8455	32.731	79.8597	6.4036	11.2973	1.76489	40.1344	53.1905	-25.1792
Z031E0004	Z031	192	11.0683	4.10803	53.736	31.4008	80.5491	6.29245	10.705	1.70397	36.2088	52.8023	-24.2916
Z031E0005	Z031	193	11.7433	4.37964	53.6751	30.8168	82.2758	6.44005	10.4437	1.6246	35.73	54.1478	-24.086
Z031E0006	Z031	194	12.0171	4.42204	54.3217	30.948	79.8961	6.14522	10.6919	1.74083	36.7641	52.8074	-23.6107
Z031E0007	Z031	195	13.0671	4.34931	60.1153	33.5137	79.6358	6.46687	11.5342	1.79134	41.7309	53.5515	-24.9704
Z031E0008	Z031	196	11.3625	4.24473	53.5477	30.7669	79.0142	5.98195	10.8613	1.82431	36.2685	51.8642	-23.5851
Z031E0009	Z031	197	11.299	4.17994	54.0386	31.4064	80.466	6.16423	10.649	1.73334	36.4164	52.8141	-24.1586
Z031E0010	Z031	198	12.9542	4.22338	61.3547	33.3298	80.0859	6.55905	11.4541	1.74776	42.0626	53.949	-25.4581
Z031E0011	Z031	199	15.6467	5.0109	62.4166	33.3438	83.7669	7.0521	10.9757	1.55983	42.8176	57.4315	-24.9038
Z031E0012	Z031	200	12.9917	4.65043	55.8145	31.779	79.4188	6.28932	11.153	1.77552	38.6439	53.0249	-23.497
Z031E0013	Z031	201	11.9471	3.9524	60.2167	33.2515	80.1248	6.53587	11.3369	1.73876	40.9906	53.4883	-25.768
Z031E0014	Z031	202	12.6458	4.37	56.7865	31.5815	84.0442	6.78777	10.4448	1.54992	37.6583	55.8885	-24.9665
Z031E0015	Z031	203	11.745	4.2639	55.0244	31.4327	78.1145	5.9726	11.1323	1.86776	37.7678	51.5873	-23.6913
Z031E0016	Z031	204	10.2113	4.13792	49.2826	29.5481	84.2378	6.40565	9.7484	1.52227	31.6343	54.3523	-24.0132
Z031E0017	Z031	205	12.9108	4.20808	61.4428	33.8035	79.408	6.51895	11.647	1.79115	42.5448	53.4996	-25.4424
Z031E0018	Z031	206	12.5708	4.40001	57.3043	31.8445	81.2377	6.43385	10.9351	1.69986	38.7479	54.1137	-24.5268
Z031E0019	Z031	207	13.5158	4.45743	60.5879	33.3028	80.6425	6.52957	11.3063	1.73299	41.7314	54.4028	-24.9898
Z031E0021	Z031	208	12.2775	4.83488	50.7167	30.3766	80.0345	6.01652	10.5304	1.75169	34.7667	52.6281	-22.3174
Z031E0022	Z031	209	12.815	4.66272	54.9364	30.9199	82.8378	6.5016	10.4843	1.61405	36.7468	55.0043	-23.8871
Z031E0023	Z031	210	12.615	4.57861	55.0304	31.6453	79.6145	6.21033	11.0125	1.77457	37.9235	52.8999	-23.5036
Z031E0024	Z031	211	12.2788	4.26581	57.5113	32.5028	78.7385	6.19442	11.3258	1.83408	39.701	52.4288	-24.3674
Z031E0025	Z031	212	13.5438	4.53889	59.3555	32.9463	80.924	6.50687	11.1399	1.71214	40.8418	54.476	-24.6408
Z031E0026	Z031	213	12.3138	4.60773	53.5014	30.7567	82.6418	6.4145	10.3633	1.61729	35.7412	54.5572	-23.7115
Z031E0027	Z031	214	13.2958	4.30641	61.669	33.2864	80.5882	6.61262	11.4287	1.72937	42.229	54.4125	-25.4376
Z031E0028	Z031	215	11.9554	4.51401	53.0846	30.4734	82.5911	6.35485	10.3303	1.62658	35.2364	54.3301	-23.7544
Z031E0030	Z031	216	12.9204	4.35388	59.2185	33.0389	78.8615	6.39365	11.4609	1.79979	41.1202	52.9796	-24.6035
Z031E0031	Z031	217	12.085	4.53764	53.224	30.3596	82.0341	6.39672	10.4562	1.63475	35.4858	54.0901	-23.6268
Z031E0032	Z031	218	12.0233	4.21318	57.3196	32.4178	81.1426	6.50437	10.9014	1.678	38.82	53.8971	-24.9552
Z031E0033	Z031	219	13.0092	4.29394	60.7847	33.743	78.4635	6.33247	11.6781	1.84414	42.4174	52.856	-24.9665
Z031E0034	Z031	220	12.9063	4.23986	60.8394	32.8876	81.9723	6.82135	11.1893	1.6404	41.1197	55.1133	-25.6974
Z031E0035	Z031	221	10.6058	3.81768	55.5839	30.9735	82.4086	6.42322	10.4809	1.63376	36.2099	53.9304	-25.3788
Z031E0036	Z031	222	13.2875	4.17795	63.6803	33.5858	82.6551	6.91727	11.2198	1.62482	42.8572	55.9318	-26.4641
Z031E0037	Z031	223	13.1617	4.47167	58.8023	32.5207	80.7321	6.51807	11.1972	1.72393	40.285	54.1779	-24.6225
Z031E0038	Z031	224	12.4238	4.06341	61.1827	33.5377	80.0606	6.54915	11.4363	1.74822	41.8534	53.7133	-25.754
Z031E0039	Z031	225	13.135	4.43215	59.2517	33.2776	81.4559	6.62947	11.0654	1.67293	40.663	54.685	-25.0214
Z031E0040	Z031	226	10.2608	4.16731	49.0369	30.1085	79.0305	5.8306	10.4751	1.79874	33.1251	51.035	-22.9233
Z031E0041	Z031	227	11.7875	4.57725	51.4198	30.3827	82.0742	6.2292	10.2967	1.66033	34.4011	53.7643	-23.2616
Z031E0042	Z031	228	13.5467	4.35791	62.3637	33.6176	80.3738	6.61407	11.4365	1.73059	42.8729	54.4599	-25.466
Z031E0043	Z031	229	13.0383	4.31091	60.4669	32.8689	80.2869	6.62925	11.3728	1.7176	41.3873	54.0728	-25.1633
Z031E0044	Z031	230	11.9875	4.4536	53.8569	30.849	81.4096	6.3009	10.5652	1.68156	36.1447	53.6836	-23.7916
Z031E0045	Z031	231	13.54	4.51255	59.8507	32.3619	83.1041	6.85897	10.8692	1.58924	40.2824	55.9675	-25.1742
Z031E0046	Z031	232	12.8996	4.40616	58.4134	32.5412	79.1446	6.29112	11.3044	1.80004	40.3319	53.0327	-24.3398
Z031E0047	Z031	233	13.6592	4.85061	56.3385	31.971	82.6423	6.62832	10.684	1.61482	38.4436	55.365	-23.8984
Z031E0048	Z031	234	13.6017	4.51891	60.1523	33.6738	77.9431	6.2433	11.7262	1.88257	42.4487	52.671	-24.3163
Z031E0049	Z031	235	11.6567	4.31433	53.9361	30.622	82.6963	6.51295	10.3948	1.59711	35.6245	54.4177	-24.2938
Z031E0050	Z031	236	10.1375	4.16322	48.7584	28.9519	82.7146	6.1143	9.8543	1.61416	31.3707	53.2768	-23.4682
Z031E0051	Z031	237	13.0575	4.28639	60.7073	33.042	79.8103	6.49215	11.4475	1.76535	41.6993	53.7405	-25.1244
Z031E0052	Z031	238	11.5083	4.09494	56.18	31.238	81.0784	6.43335	10.8724	1.6919	37.4725	53.5329	-24.7902
Z031E0053	Z031	239	12.4808	4.31083	57.9163	32.1407	79.9762	6.32515	11.1234	1.76043	39.4719	53.344	-24.5515
Z031E0054	Z031	240	9.5246	3.93432	48.4782	29.2063	80.9324	5.91215	10.0017	1.69574	31.4982	51.8915	-23.469
Z031E0055	Z031	241	13.5196	4.38649	61.6951	33.1143	79.5688	6.53082	11.445	1.77211	42.4554	53.9026	-25.0726
Z031E0056	Z031	242	12.9325	4.82289	53.6678	31.3848	80.5178	6.32665	10.7213	1.69522	36.9835	53.5349	-23.0596
Z031E0057	Z031	243	14.2525	4.60271	61.9478	33.3399	82.0968	6.85952	11.2281	1.63694	42.4329	55.8018	-25.2715
Z031E0058	Z031	244	13.3138	4.78116	55.9081	31.0053	83.9259	6.71392	10.3361	1.53882	37.2057	56.0347	-24.0921
Z031E0059	Z031	245	11.2338	4.26747	54.8003	31.5455	79.1169	6.1586	10.9515	1.78166	37.2521	52.113	-24.0642
Z031E0060	Z031	246	14.6933	4.60795	63.648	34.0051	81.9452	6.89205	11.4125	1.66327	43.8748	56.0031	-25.5552
Z031E0061	Z031	247	12.0825	4.61716	52.2665	30.8726	80.7014	6.16607	10.5533	1.71585	35.5594	53.1191	-23.1238
Z031E0062	Z031	248	12.1721	4.45274	54.7887	31.4395	82.1199	6.43605	10.6121	1.6499	36.8555	54.2821	-24.1761
Z031E0064	Z031	249	12.4729	4.35448	57.2606	32.7875	80.2537	6.40427	11.0987	1.73288	39.4215	53.4709	-24.5418
Z031E0065	Z031	250	10.0142	4.38554	45.6555	27.9129	83.8228	6.1802	9.4389	1.53214	28.9313	53.6987	-22.7326
Z031E0066	Z031	251	11.0279	4.31339	51.0786	30.2611	81.9443	6.31117	10.2852	1.63096	33.8936	53.4214	-23.6554
Z031E0067	Z031	252	13.0673	4.30191	60.7787	33.332	81.9663	6.85298	11.0668	1.61412	41.3221	55.2111	-25.6463
Z031E0068	Z031	253	13.6633	4.70411	58.3701	32.0159	82.5493	6.65085	10.8691	1.641	39.5416	55.473	-24.4488
Z031E0069	Z031	254	12.9308	4.2336	61.1032	33.5437	80.3851	6.5667	11.3591	1.73258	41.9316	54.0997	-25.4849
Z031E0070	Z031	255	11.8583	4.74126	55.3094	31.0035	83.3109	6.55809	10.3824	1.58645	36.4512	55.1115	-24.3388
Z031E0071	Z031	256	13.595	4.33753	62.72	33.8351	81.2465	6.79747	11.3477	1.67185	42.9817	55.1007	-25.7807
Z031E0072	Z031	257	13.3708	4.37751	61.0724	32.6022	81.7063	6.78832	11.1916	1.65139	41.3356	55.1548	-25.3795
Z031E0073	Z031	258	13.0217	4.54002	57.2974	32.3582	78.7887	6.1932	11.2638	1.81955	39.8017	52.7423	-23.8318
Z031E0074	Z031	259	11.0867	3.99515	55.5108	31.8964	78.6528	6.20405	11.2612	1.81921	37.9444	51.7671	-24.4778
Z031E0076	Z031	260	10.735	4.13738	51.7934	30.1026	82.3512	6.25577	10.2337	1.63822	33.9077	53.5665	-24.0787
Z031E0077	Z031	261	13.1467	4.62467	56.8948	31.7632	80.2456	6.4228	11.0837	1.72807	39.034	53.7251	-23.8778
Z036E0001	Z036	262	13.5531	4.53266	59.996	32.4746	81.4127	6.62962	11.1123	1.68743	40.8336	54.8939	-24.8372
Z036E0002	Z036	263	12.4789	4.37256	57.1159	32.3142	80.2455	6.35119	11.1145	1.76589	39.1277	53.419	-24.4075
Z036E0003	Z036	264	14.1355	4.44339	63.6878	33.8844	81.3106	6.74687	11.3756	1.68833	43.6803	55.3929	-25.7154
Z036E0004	Z036	265	9.3644	4.13744	45.2604	27.8363	80.5394	5.73572	9.8033	1.71043	29.1926	51.2905	-22.3576
Z036E0005	Z036	266	12.3267	4.34846	56.6997	32.1257	80.5637	6.3325	10.967	1.73233	38.6292	53.5272	-24.4133
Z036E0006	Z036	267	11.3206	4.66945	48.4845	29.0358	79.9551	5.87117	10.2138	1.74023	32.4837	52.023	-22.0549
Z036E0007	Z036	268	12.0089	4.1595	57.7097	33.0009	79.3501	6.27258	11.2154	1.79651	39.7588	52.7363	-24.7854
Z036E0008	Z036	269	13.0456	4.44955	58.788	32.7619	80.0584	6.41519	11.2549	1.75459	40.4922	53.7016	-24.5621
Z036E0009	Z036	270	12.9706	4.47541	57.6324	31.9518	80.497	6.4604	10.9396	1.71062	39.2832	53.9002	-24.2923
Z036E0010	Z036	271	11.9539	4.19422	55.6854	31.8032	80.8396	6.36049	10.7815	1.69811	37.6862	53.4735	-24.4605
Z036E0011	Z036	272	13.4319	4.24221	63.4346	34.0829	78.0717	6.37429	11.892	1.86822	44.2062	53.0249	-25.4239
Z036E0012	Z036	273	15.1573	4.66888	64.9506	34.5752	80.5511	6.80878	11.7142	1.72731	45.3805	55.4302	-25.441
Z036E0013	Z036	274	12.4523	4.59716	58.4589	31.5974	80.7044	6.44919	11.0513	1.71392	39.3124	53.9759	-24.5346
Z036E0014	Z036	275	11.0331	4.0001	55.2436	31.8341	79.531	6.15739	10.8343	1.7616	37.3617	52.2735	-24.5529
Z036E0015	Z036	276	12.901	4.42129	58.4266	33.3074	81.7803	6.71473	11.0404	1.64934	40.1296	54.7478	-25.023
Z036E0016	Z036	277	11.8419	4.18241	56.6746	31.5605	81.3303	6.38035	10.8327	1.69906	37.9224	53.8169	-24.7772
Z036E0017	Z036	278	13.8844	4.63701	60.001	32.643	80.4764	6.51687	11.3026	1.73591	41.3193	54.4077	-24.4699
Z036E0018	Z036	279	12.0594	4.26223	56.2938	31.6162	81.7778	6.53898	10.8234	1.6665	37.7992	54.1872	-24.6928
Z036E0019	Z036	280	11.0489	4.06273	54.4946	31.1884	79.4638	6.09867	10.7844	1.76879	36.6775	52.1615	-24.2171
Z036E0020	Z036	281	13.0073	4.5554	57.0476	32.4138	78.4706	6.13729	11.2691	1.83786	39.7619	52.5076	-23.7049
Z036E0021	Z036	282	13.0398	4.12695	63.1509	33.1568	80.1441	6.69133	11.4548	1.7128	42.8758	54.2689	-25.9207
Z036E0022	Z036	283	11.1931	4.39806	50.9177	30.6801	79.3793	5.71999	10.3639	1.80967	34.5379	51.7236	-22.9116
Z036E0023	Z036	284	12.6389	4.32074	58.6275	32.2149	81.8336	6.6404	11.011	1.66333	39.54	54.676	-25.0722
Z036E0024	Z036	285	14.4098	5.26217	54.794	31.3122	83.8317	6.62899	10.2383	1.56438	37.2526	56.2664	-23.0784
Z036E0025	Z036	286	13.0023	4.71869	55.0538	31.5742	78.8729	6.09538	11.0717	1.8269	38.2245	52.5701	-23.0846
Z036E0026	Z036	287	13.5389	4.44925	60.956	33.2674	79.6255	6.48928	11.48	1.76652	42.1836	53.8447	-24.879
Z036E0027	Z036	288	14.1764	4.3934	64.238	34.0602	80.8963	6.80649	11.5991	1.71913	44.2523	55.2032	-25.8349
Z036E0028	Z036	289	12.7364	4.5818	55.4139	31.4751	79.9348	6.22257	10.9471	1.76792	37.9775	53.1731	-23.5739
Z036E0029	Z036	290	11.0314	4.04199	54.5701	30.4806	83.5102	6.56835	10.345	1.5874	35.4117	54.7069	-25.0001
Z036E0030	Z036	291	12.2977	4.15558	59.2526	32.4054	79.8107	6.52595	11.3118	1.73552	40.322	53.3846	-25.1054
Z036E0032	Z036	292	12.6973	4.14533	61.3109	33.6309	79.7591	6.47886	11.452	1.76921	42.1299	53.6217	-25.558
Z036E0033	Z036	293	11.6573	4.10462	56.6292	31.8212	80.4674	6.34144	10.9543	1.72838	38.178	53.2202	-24.7718
Z036E0034	Z036	294	11.5314	4.06951	56.7069	31.2861	81.9465	6.57638	10.775	1.6435	37.5582	54.1623	-25.1157
Z036E0035	Z036	295	11.2848	4.10368	55.0449	30.6344	81.7421	6.45731	10.5515	1.63533	36.257	53.8001	-24.6518
Z036E0036	Z036	296	13.4619	4.37066	61.6384	33.0896	80.8879	6.61784	11.3275	1.71667	42.0792	54.6641	-25.345
Z036E0037	Z036	297	12.8819	4.26016	60.8286	32.9909	79.3083	6.49209	11.6006	1.79064	41.8396	53.3918	-25.142
Z036E0038	Z036	298	12.9714	4.47137	58.0253	32.4278	78.87	6.27887	11.3774	1.81635	40.2156	52.8561	-24.1142
Z036E0039	Z036	299	12.9556	4.20165	61.8099	33.6908	78.4247	6.39254	11.8191	1.84767	42.9428	52.9143	-25.288
Z036E0040	Z036	300	10.4253	4.02161	51.9554	30.4346	79.3513	5.90915	10.6109	1.79479	34.7472	51.5576	-23.7347
Z036E0041	Z036	301	9.0069	3.66747	49.2723	29.4704	81.8142	5.96721	9.9886	1.67597	31.6042	52.2591	-24.2382
Z036E0042	Z036	302	14.0868	4.75663	59.1833	32.7877	83.9529	6.97338	10.7024	1.53816	40.1749	56.6697	-24.8835
Z036E0043	Z036	303	15.2381	5.00585	60.5205	33.0032	82.5406	6.84501	10.9913	1.60831	41.7993	56.3243	-24.3211
Z036E0044	Z036	304	13.9981	4.70594	59.4644	32.7255	81.2461	6.56794	11.1092	1.69618	40.9113	54.8834	-24.4162
Z036E0045	Z036	305	13.1585	4.32088	60.9559	31.9995	84.4043	7.07537	10.7752	1.52623	40.1994	56.7777	-25.9392
Z036E0046	Z036	306	11.7439	4.5474	51.508	29.5382	82.6316	6.25069	10.1061	1.62017	33.8056	54.1277	-23.3044
Z036E0047	Z036	307	9.896	3.92756	50.4988	30.0356	80.4244	5.97026	10.3431	1.73184	33.2992	51.8946	-23.8291
Z036E0048	Z036	308	11.7744	4.14913	56.7578	32.4888	78.1329	6.08454	11.34	1.86597	39.2344	51.7726	-24.3329
Z036E0049	Z036	309	13.4431	4.30158	62.7254	34.2569	79.0099	6.49176	11.7796	1.81829	43.7378	53.5583	-25.443
Z036E0050	Z036	310	12.6319	4.39478	57.2584	32.1212	81.4892	6.5915	10.9468	1.66719	38.873	54.3422	-24.634
Z036E0051	Z036	311	13.8773	4.81059	57.6667	31.6987	81.9847	6.55172	10.8196	1.65632	39.2143	55.1437	-23.9655
Z036E0052	Z036	312	11.2344	3.97607	56.6208	32.6167	79.0569	6.19077	11.1449	1.80423	38.7381	52.1574	-24.8383
Z036E0053	Z036	313	11.4044	4.30984	52.9104	30.8264	80.1639	6.17427	10.7964	1.76475	35.7877	52.5618	-23.6509
Z036E0054	Z036	314	10.9681	4.02349	54.6159	31.5576	79.1185	6.00834	10.9215	1.81708	37.0022	51.8594	-24.2649
Z036E0055	Z036	315	11.4113	4.11775	55.5692	31.8453	79.2145	6.17857	10.9822	1.78965	37.8267	52.2541	-24.3521
Z036E0056	Z036	316	13.1669	4.49434	58.6377	32.0059	82.4228	6.64901	10.8917	1.64314	39.4877	55.2289	-24.8242
Z036E0057	Z036	317	10.2732	4.3999	46.8721	27.9734	84.9745	6.26229	9.3463	1.49768	29.3802	54.5996	-23.1208
Z036E0058	Z036	318	11.1131	4.0277	55.0794	30.9527	80.1488	6.23585	10.8472	1.74366	36.7844	52.6699	-24.4807
Z036E0059	Z036	319	12.9906	4.65395	55.688	31.2357	80.6015	6.32712	10.8566	1.73228	37.9387	53.7393	-23.6001
Z036E0060	Z036	320	12.7073	4.15515	61.2556	32.8458	81.7051	6.60719	11.0391	1.67404	41.1476	54.8483	-25.7952
Z036E0061	Z036	321	12.8123	4.43594	57.5949	31.7297	79.6744	6.33707	10.9511	1.73576	39.2375	53.3347	-24.16
Z036E0062	Z036	322	12.5306	4.28591	58.693	32.5875	80.4187	6.43443	11.09	1.7265	39.9927	53.7438	-24.8926
Z036E0063	Z036	323	12.2831	4.55488	54.1509	31.2077	80.1797	6.24131	10.7965	1.73136	36.9391	53.0793	-23.4936
Z036E0064	Z036	324	13.2631	4.53889	58.3654	33.1039	78.2312	6.26125	11.5685	1.85067	41.0512	52.5884	-24.0121
Z036E0065	Z036	325	12.7298	4.15415	61.4022	33.0114	79.7031	6.41948	11.45	1.78894	41.8842	53.5864	-25.444
Z036E0066	Z036	326	12.2681	4.11214	59.583	33.2966	79.2262	6.28711	11.2858	1.79838	40.9576	52.9369	-25.1592
Z036E0067	Z036	327	14.4639	4.93235	58.7049	31.4189	84.9603	7.05212	10.5002	1.49331	39.1528	57.4248	-24.5166
Z036E0068	Z036	328	14.1031	4.39064	64.5296	33.7032	81.3122	6.88741	11.4834	1.66944	44.0586	55.5272	-25.9741
Z036E0069	Z036	329	14.2198	4.52923	62.5131	33.5974	79.6622	6.49042	11.5893	1.78637	43.4119	54.2264	-24.9638
Z036E0070	Z036	330	12.8181	4.17465	61.7972	33.32	81.0507	6.67718	11.2647	1.6891	41.9429	54.5793	-25.838
Z036E0071	Z036	331	12.5756	4.5453	55.3154	31.5888	80.9178	6.31305	10.789	1.71318	37.6564	53.7235	-23.85
Z036E0072	Z036	332	13.3269	4.4961	59.0975	33.2548	79.6385	6.4604	11.4479	1.78471	41.1899	53.5714	-24.5059
Z036E0073	Z036	333	13.2598	4.31645	61.4521	32.8865	80.681	6.6129	11.3558	1.71999	41.8619	54.454	-25.3554
Z036E0074	Z036	335	10.4848	4.20207	50.1193	29.913	79.8067	5.92824	10.4288	1.75979	33.474	51.7236	-23.1874
Z036E0075	Z036	336	13.5431	4.43319	61.1324	32.7754	81.274	6.63265	11.1972	1.69582	41.5813	54.8974	-25.1837
Z036E0076	Z036	337	11.3694	4.21595	53.8345	30.1839	79.7829	6.0092	10.4327	1.7362	35.7515	52.4443	-23.7226
Z036E0077	Z036	338	13.3735	4.39959	60.8299	32.9336	79.5893	6.44738	11.4446	1.77935	41.8738	53.7346	-24.8814
Z036E0078	Z036	339	13.926	4.79504	58.0149	32.3732	78.137	6.24355	11.3491	1.81825	40.7149	52.8216	-23.3762
Z036E0079	Z036	340	11.1814	4.00412	55.2814	31.0333	80.871	6.34371	10.7517	1.70418	36.773	53.1753	-24.6879
Z036E0080	Z036	341	13.7981	4.77187	57.5844	32.2293	79.6816	6.31481	11.1795	1.77859	40.0029	53.6323	-23.6113
Z036E0081	Z036	342	13.0289	4.41964	58.9448	31.9277	82.6697	6.7878	10.8849	1.60752	39.5102	55.4212	-25.0763
Z036E0082	Z036	343	12.1189	4.12763	58.6105	32.37	80.9478	6.51359	11.1269	1.70941	39.5986	53.8937	-25.2344
Z036E0083	Z036	344	13.0944	4.20995	62.3461	33.0035	81.0117	6.7388	11.3565	1.69585	42.2312	54.7252	-25.8027
Z036E0084	Z036	345	11.7514	4.29261	54.7435	31.2882	79.6888	6.25068	10.8262	1.73774	37.1476	52.6553	-23.946
Z036E0085	Z036	346	13.6664	4.43351	61.6158	32.891	82.8272	6.92254	11.0464	1.59862	41.5838	56.0237	-25.6204
Z032E0001	Z032	347	12.9657	4.44065	58.1915	32.1847	79.7362	6.34749	11.1903	1.7724	39.9157	53.4161	-24.3104
Z032E0002	Z032	348	12.3388	4.19107	58.8837	32.1875	79.7173	6.40406	11.2991	1.77211	40.0484	53.243	-24.8951
Z032E0004	Z032	349	12.9883	4.32557	60.2292	32.6573	78.2755	6.35083	11.6336	1.83979	41.6384	52.7321	-24.6544
Z032E0005	Z032	350	13.0404	4.28947	60.7239	32.9053	80.785	6.74181	11.3258	1.68381	41.425	54.4394	-25.3617
Z032E0006	Z032	351	9.7804	3.93023	49.9396	29.169	81.5726	6.10085	9.9086	1.62661	32.1372	52.615	-23.8628
Z032E0007	Z032	352	10.2598	3.70816	55.3753	31.2045	80.2713	6.28478	10.8714	1.73204	36.6817	52.4542	-25.1696
Z032E0008	Z032	353	13.85	4.29153	64.5456	33.4055	81.1398	6.79025	11.5059	1.69501	43.8393	55.2781	-26.043
Z032E0009	Z032	354	11.5	3.87236	59.516	32.2142	82.0205	6.74634	11.0307	1.63877	39.4698	54.4834	-26.0857
Z032E0010	Z032	355	12.65	4.27343	59.2244	32.5072	80.5136	6.52386	11.2052	1.72143	40.3103	53.9113	-25.0129
Z032E0011	Z032	356	14.3733	4.48687	64.0709	33.3077	80.7383	6.8028	11.6176	1.70796	43.9286	55.1966	-25.5284
Z032E0012	Z032	357	15	4.56711	65.5862	34.6926	79.0169	6.58152	11.9466	1.81502	46.0524	54.4208	-25.3955
Z032E0013	Z032	358	11.5857	4.01348	57.4508	32.1647	79.1301	6.18148	11.1592	1.8076	39.046	52.4016	-24.8119
Z032E0014	Z032	359	12.8092	4.07528	62.814	33.6944	79.8319	6.59469	11.6538	1.76899	43.0263	53.8636	-25.9609
Z032E0015	Z032	360	11.6438	3.95534	57.4693	32.0484	79.7045	6.30321	11.0773	1.76302	38.8839	52.8042	-24.9657
Z032E0016	Z032	361	13.1183	4.0768	64.4488	34.1482	79.8064	6.62326	11.7464	1.77449	44.2067	54.1151	-26.2699
Z032E0017	Z032	362	13.3129	4.21792	63.0941	33.4703	80.4568	6.73452	11.6414	1.73073	43.1564	54.5033	-25.855
Z032E0018	Z032	363	13.0254	4.07433	63.9821	33.5671	83.6099	7.1034	11.1697	1.57348	42.6989	56.4915	-26.9247
Z032E0019	Z032	364	13.1334	4.33827	60.4655	32.5857	80.0346	6.51363	11.2232	1.72559	41.2412	53.9472	-24.9838
Z032E0020	Z032	365	13.705	4.26227	64.3811	34.1716	82.9197	6.97921	11.1752	1.60739	43.5864	56.3335	-26.5449
Z032E0021	Z032	366	13.7717	4.45377	62.3834	33.9081	78.9943	6.55028	11.7692	1.79964	43.5561	53.6933	-25.1038
Z032E0022	Z032	367	11.9403	3.9794	59.8249	32.4525	81.7977	6.66389	11.0592	1.65963	39.9585	54.4986	-25.8806
Z032E0023	Z032	368	10.2388	4.15509	49.4658	29.9761	81.3994	6.05604	9.986	1.64835	32.5687	52.6046	-23.4882
Z032E0024	Z032	369	10.775	4.00178	53.7975	31.1066	80.0925	6.06542	10.699	1.76439	36.0146	52.3202	-24.2956
Z032E0025	Z032	370	13.6971	4.37766	62.6756	33.8354	78.1064	6.38673	11.8878	1.86891	43.8339	53.08	-25.037
Z032E0026	Z032	371	12.3879	4.34303	56.803	31.2741	81.061	6.39668	10.8267	1.69669	38.1288	53.9062	-24.4064
Z032E0027	Z032	372	11.6275	4.01923	57.8186	32.3612	78.2082	6.19415	11.4528	1.86125	39.6744	51.8921	-24.7485
Z032E0028	Z032	373	14.2075	4.40517	64.7028	34.5095	80.8225	6.83159	11.6614	1.70787	44.7544	55.2301	-25.9743
Z032E0029	Z032	374	13.0713	4.33701	60.3277	32.727	80.5028	6.59845	11.2859	1.71251	41.173	54.194	-25.1063
Z032E0030	Z032	375	14.2509	4.62756	61.5556	33.1832	79.9227	6.64165	11.6229	1.74908	42.7672	54.3823	-24.7109
Z032E0031	Z032	376	13.5792	4.47985	60.8428	33.2652	79.8421	6.56291	11.4931	1.75576	42.1255	54.0047	-24.8771
Z032E0032	Z032	377	13.7625	4.22257	65.2369	33.9864	81.8122	6.9281	11.5486	1.66771	44.3248	55.7315	-26.5173
Z032E0033	Z032	378	13.8536	4.58327	60.337	33.1854	81.7532	6.63826	11.0849	1.67163	41.383	55.2192	-24.924
Z032E0034	Z032	379	12.5979	4.31854	58.3438	31.9602	81.4258	6.55983	10.9732	1.68162	39.3125	54.3783	-24.8948
Z032E0035	Z032	380	13.3488	4.1824	63.865	34.13	79.8717	6.60978	11.6808	1.77099	43.9709	54.1856	-25.9829
Z032E0036	Z032	381	13.5842	4.46629	60.9148	32.6281	84.403	6.9869	10.7023	1.53206	40.6109	56.8937	-25.7204
Z032E0038	Z032	382	12.0754	4.04873	59.7248	32.7323	80.0158	6.48567	11.2025	1.7311	40.5054	53.4514	-25.432
Z032E0039	Z032	383	10.3405	4.04389	51.2717	30.0629	80.375	6.08345	10.4132	1.71256	33.9341	52.1695	-23.7815
Z032E0040	Z032	384	12.455	4.10963	60.4672	32.7149	81.3084	6.67954	11.1859	1.67561	40.7735	54.4707	-25.6943
Z032E0041	Z032	385	10.7191	4.0235	53.3412	30.1718	81.1216	6.25074	10.5778	1.69226	35.0866	52.9645	-24.3107
Z032E0042	Z032	386	9.7458	4.16288	47.0543	28.9601	82.5391	6.05889	9.8042	1.61919	30.4059	52.8546	-23.1926
Z032E0043	Z032	387	12.6813	4.08197	61.2432	33.6564	77.5752	6.25063	11.7817	1.88784	42.6657	52.2051	-25.1589
Z032E0044	Z032	388	11.7131	4.07339	57.5387	32.3741	79.2224	6.22154	11.1727	1.80054	39.2412	52.5314	-24.796
Z032E0045	Z032	389	11.3717	4.01616	56.2918	31.932	79.6935	6.25304	11.0374	1.77966	38.1358	52.579	-24.7218
Z032E0046	Z032	390	14.727	4.51928	65.2226	34.1995	80.955	6.87567	11.6206	1.69016	45.0275	55.584	-25.8082
Z032E0047	Z032	391	10.9263	4.12302	53.0292	29.2988	86.5	6.75257	9.709	1.43866	33.1733	56.402	-25.0429
Z032E0048	Z032	392	13.7283	4.38041	62.6096	33.3704	80.8424	6.66994	11.2884	1.69246	42.7847	54.8717	-25.5003
Z032E0049	Z032	393	12.76	4.05486	62.7919	33.4374	80.5366	6.66155	11.4797	1.72445	42.6517	54.3045	-26.0944
Z032E0050	Z032	394	13.4902	4.38239	61.6094	32.5557	81.8537	6.76942	11.1865	1.65216	41.5795	55.3228	-25.4614
Z032E0051	Z032	395	13.4366	4.65674	58.2828	31.4073	82.3707	6.61557	10.8063	1.63658	39.1061	55.2974	-24.4209
Z032E0052	Z032	396	14.6871	4.75212	61.7131	33.9626	79.503	6.58146	11.5809	1.76638	43.4588	54.2964	-24.5045
Z032E0053	Z032	397	12.9267	4.2996	60.1096	32.718	80.4589	6.54398	11.2733	1.72462	40.996	54.0636	-25.1125
Z032E0054	Z032	398	13.7588	4.37064	63.012	33.9149	80.3275	6.66988	11.5642	1.73562	43.4971	54.5703	-25.5748
Z032E0055	Z032	399	12.0875	4.10657	58.7595	32.544	80.1223	6.42708	11.222	1.74653	39.9387	53.3791	-25.1491
Z032E0056	Z032	400	14.505	4.60546	63.0239	34.1482	79.8011	6.6397	11.6684	1.75783	44.0842	54.5251	-25.0639
Z032E0057	Z032	401	12.3583	4.24591	54.958	30.9262	82.6515	6.46058	10.5319	1.63639	36.6042	54.6144	-24.3437
Z032E0058	Z032	402	12.8888	4.14745	62.0962	33.5855	79.4597	6.52068	11.6383	1.78478	42.7211	53.5882	-25.6186
Z032E0059	Z032	403	13.685	4.39404	62.2839	33.5889	79.6599	6.54224	11.6273	1.77917	43.1057	54.029	-25.2257
Z032E0060	Z032	404	10.6	3.78691	55.9701	31.7784	80.3535	6.38089	10.8788	1.70846	37.3924	52.734	-25.2401
Z032E0061	Z032	405	13.4733	4.59367	58.6821	32.3337	80.029	6.42665	11.2548	1.75827	40.4234	53.8477	-24.2149
Z032E0062	Z032	406	13.3754	4.32819	61.8698	32.5969	84.2541	7.06541	10.7992	1.52924	41.0529	56.8481	-26.1061
Z032E0063	Z032	407	11.6782	4.32553	53.7913	30.8246	80.7336	6.22827	10.5998	1.70666	36.1097	53.1398	-23.8453
Z032E0064	Z032	408	12.9558	4.48897	57.7652	31.9829	80.7166	6.58406	11.1616	1.69904	39.446	54.0554	-24.4055
Z032E0065	Z032	409	11.225	4.31401	51.8946	31.0656	77.2783	5.71915	11.0129	1.92876	35.9562	50.5236	-22.8801
Z029E0013	Z029	410	12.3682	4.56101	54.2613	30.4774	86.4469	6.85195	9.858	1.43507	35.0466	57.0579	-24.6409
Z032E0067	Z032	411	13.3033	3.97445	66.8653	34.841	80.2719	6.85239	11.9254	1.7446	45.8038	54.7455	-27.0582
Z032E0068	Z032	412	12.4321	4.28834	58.1587	31.1924	83.4381	6.74575	10.6714	1.58401	38.2571	55.5713	-25.2338
Z032E0069	Z032	413	15.5083	4.85312	63.9967	33.9728	80.4566	6.75977	11.6974	1.73927	44.7869	55.4059	-24.8524
Z032E0071	Z032	415	12.395	4.02852	61.4935	33.4916	79.2062	6.48268	11.6647	1.80068	42.2405	53.1795	-25.6882
Z032E0072	Z032	416	11.3825	3.81078	59.7744	32.785	78.65	6.34411	11.5419	1.82129	40.682	52.2918	-25.6067
Z032E0073	Z032	417	14.3608	4.48248	63.9876	33.1561	80.8704	6.88029	11.3963	1.65753	43.6877	55.3581	-25.5421
Z032E0074	Z032	418	12.5675	4.4037	57.0477	32.2185	80.6692	6.45856	10.9223	1.69244	38.9215	53.7955	-24.4325
Z032E0075	Z032	419	10.7625	4.56317	47.1717	28.3682	80.8327	5.84737	9.7778	1.67259	30.8984	52.259	-22.0975
Z032E0076	Z032	420	13.1092	4.10491	63.6893	34.1392	78.6288	6.53298	11.8888	1.82098	44.1325	53.3169	-25.8587
Z032E0077	Z032	421	12.3602	4.65655	53.132	30.2068	82.8194	6.43211	10.1877	1.5883	35.1985	54.7002	-23.535
Z032E0078	Z032	422	13.7488	4.57015	59.8098	32.736	81.9447	6.72073	11.0473	1.64563	40.8291	55.2923	-24.8577
Z032E0080	Z032	423	12.9975	4.22678	61.506	32.801	80.3222	6.52799	11.4474	1.75935	41.8375	54.0936	-25.4293
Z032E0081	Z032	424	11.0893	4.27547	51.9223	29.8657	83.9809	6.43557	9.9516	1.55432	33.5684	54.7686	-24.1723
Z032E0082	Z032	425	12.1338	4.18151	58.0895	32.6217	78.7073	6.18288	11.3539	1.84071	39.9885	52.3978	-24.6162
Z032E0083	Z032	426	13.0825	4.55146	57.5913	31.4267	81.7922	6.51237	10.7633	1.65676	38.7129	54.7277	-24.3493
Z032E0084	Z032	427	13.1433	4.34973	60.4561	33.2552	80.4117	6.56324	11.2462	1.71613	41.5128	54.165	-25.1418
Z032E0085	Z032	428	14.1367	4.43668	63.771	33.6014	81.0802	6.91675	11.5388	1.66823	43.7452	55.3452	-25.7222
Z032E0086	Z032	429	13.9471	4.22167	66.0765	33.552	86.2498	7.56553	10.8061	1.42897	43.4463	58.7966	-27.5261
Z032E0087	Z032	430	10.6844	4.26095	49.9558	30.0763	80.1564	5.82776	10.29	1.7662	33.3986	51.9346	-23.0804
Z032E0088	Z032	431	13.125	4.275	61.1578	33.0299	80.6856	6.61792	11.2815	1.70932	41.6981	54.3909	-25.3931
Z032E0089	Z032	432	10.933	4.11889	53.113	31.5201	79.5965	6.20532	10.791	1.74325	36.1373	52.1118	-24.022
Z032E0091	Z032	433	13.724	4.53043	60.6358	33.1245	79.5564	6.37191	11.4344	1.79468	42.0094	53.7872	-24.608
Z032E0092	Z032	434	11.9275	4.09656	58.4043	32.167	80.0352	6.40471	11.2577	1.75743	39.5523	53.2267	-25.0638
Z032E0093	Z032	435	12.1763	4.15133	58.6217	32.5104	80.983	6.50019	11.0603	1.70693	39.6543	53.9417	-25.216
Z032E0094	Z032	436	13.3717	4.49863	59.6019	32.1533	83.162	6.79204	10.8928	1.60316	39.9791	55.8774	-25.1508
Z032E0095	Z032	437	12.4442	4.69653	52.977	30.1138	83.4351	6.50318	10.1964	1.57462	35.0099	55.0837	-23.5568
Z033E0001	Z033	438	13.6775	4.57632	59.7692	32.4935	81.3475	6.67348	11.0913	1.66531	40.7977	54.917	-24.7183
Z033E0002	Z033	439	12.3058	4.11515	59.3602	32.5527	79.7277	6.39954	11.2927	1.77118	40.4285	53.2657	-25.1195
Z033E0003	Z033	440	11.6788	3.99722	58.1927	32.6189	79.5153	6.32213	11.2024	1.77601	39.6281	52.7814	-25.1276
Z033E0004	Z033	441	12.915	4.78506	54.2427	31.0537	81.197	6.3444	10.6768	1.68653	36.9296	53.9711	-23.2939
Z033E0005	Z033	442	12.7394	4.63831	55.5983	31.1548	82.5018	6.50013	10.5813	1.63982	37.2634	54.8398	-24.0476
Z033E0006	Z033	443	13.0523	4.60255	56.6705	31.8703	82.5587	6.58332	10.6443	1.62946	38.2827	55.0943	-24.3335
Z033E0007	Z033	444	14.57	4.6756	62.2682	33.6755	78.5891	6.42788	11.6536	1.81667	43.7224	53.7147	-24.4791
Z033E0008	Z033	445	13.7792	4.54547	60.7221	32.7254	80.2432	6.55672	11.3691	1.73367	41.743	54.3185	-24.7206
Z033E0009	Z033	446	11.6625	4.26393	54.7623	30.6766	81.4932	6.35734	10.5459	1.65918	36.3324	53.7302	-24.2607
Z033E0010	Z033	447	13.475	4.48416	60.108	32.8986	80.7386	6.62509	11.281	1.70644	41.2788	54.4645	-24.8734
Z033E0011	Z033	448	13.115	4.50914	58.273	31.3617	82.9839	6.76051	10.7414	1.59699	38.8141	55.5877	-24.7947
Z033E0012	Z033	449	13.6929	4.32732	63.2649	33.6612	80.0412	6.66611	11.3878	1.71123	43.4334	54.4646	-25.5981
Z033E0013	Z033	450	13.8742	4.3262	64.3182	33.2076	82.6946	6.943	11.2304	1.61796	43.2232	56.2568	-26.2421
Z033E0014	Z033	451	13.7283	4.51386	60.972	32.7088	80.39	6.61396	11.4779	1.73709	41.8682	54.4072	-24.8611
Z033E0015	Z033	452	12.8158	4.45725	57.5874	32.1134	79.7307	6.34178	11.1242	1.7576	39.4999	53.3238	-24.2073
Z033E0016	Z033	453	10.4667	4.29946	48.6911	29.3425	79.5572	5.83771	10.3587	1.77695	32.5135	51.419	-22.6576
Z033E0017	Z033	454	13.5471	4.69034	57.7529	31.8147	81.996	6.6313	10.9032	1.6443	39.2268	55.0577	-24.2426
Z033E0018	Z033	455	10.1383	4.59847	44.1189	27.9521	84.9256	6.04149	9.1395	1.51428	27.8782	54.198	-22.3312
Z033E0019	Z033	456	12.0092	4.1322	58.3284	31.9391	79.7516	6.37997	11.1602	1.75031	39.4439	53.1153	-24.9006
Z033E0020	Z033	457	11.8825	4.40183	54.2397	29.8397	87.4164	7.01506	9.7824	1.39677	34.3211	57.5048	-25.0627
Z033E0021	Z033	458	11.07	4.20076	52.7004	30.0917	82.9531	6.35054	10.1809	1.60614	34.3425	54.1755	-24.2371
Z033E0022	Z033	459	11.895	4.50353	52.9332	29.9789	82.4385	6.33561	10.3103	1.62786	34.9153	54.2135	-23.6514
Z033E0023	Z033	460	13.5667	4.62248	58.7831	31.6359	82.2975	6.64484	10.843	1.63228	39.5443	55.3493	-24.5403
Z033E0024	Z033	461	13.0575	4.26136	61.2724	33.4415	80.2993	6.5506	11.3621	1.73529	42.0302	54.1101	-25.4211
Z033E0025	Z033	462	11.7629	4.14765	56.7799	31.4417	82.1598	6.59297	10.655	1.6216	37.6663	54.411	-25.0487
Z033E0026	Z033	463	12.3242	4.0914	60.2204	33.0756	82.2548	6.85125	11.086	1.61852	40.5707	55.0235	-25.9683
Z033E0027	Z033	464	11.5125	4.43839	52.1205	30.9525	78.7475	5.93427	10.7757	1.82257	35.7541	51.6477	-23.0346
Z033E0028	Z033	465	13.6567	4.29025	63.7506	33.568	81.0895	6.8498	11.5285	1.68513	43.4968	55.1306	-25.9755
Z033E0029	Z033	466	13.6363	4.52054	60.2932	33.6069	79.4027	6.50996	11.539	1.77602	42.1579	53.6868	-24.662
Z033E0030	Z033	467	13.0996	4.49718	58.2644	30.986	84.2216	6.90029	10.413	1.51145	38.2309	56.4101	-25.009
Z033E0031	Z033	468	11.605	4.23591	54.1776	30.7418	79.587	6.06568	10.8364	1.78623	36.5378	52.3707	-23.7677
Z033E0032	Z033	469	13.315	4.56643	59.1623	33.4281	77.8923	6.1575	11.6655	1.89538	41.7085	52.4297	-24.093
Z033E0033	Z033	470	12.9594	4.51517	57.6959	31.4055	82.7646	6.64481	10.6785	1.60966	38.4869	55.3116	-24.6498
Z033E0034	Z033	471	14.9122	4.67295	64.0534	34.3051	80.4851	6.71617	11.5717	1.7338	44.6478	55.2057	-25.2479
Z033E0035	Z033	472	14.9167	4.53038	66.0961	34.1462	81.4583	6.97646	11.6791	1.67568	45.4419	56.0543	-26.0333
Z033E0036	Z033	473	12.8558	4.0419	63.6011	33.7971	79.6795	6.62316	11.762	1.77853	43.5587	53.8653	-26.1391
Z033E0037	Z033	474	12.1604	4.11862	58.6659	32.3372	80.3404	6.40313	11.0366	1.7253	39.6809	53.5445	-25.0914
Z033E0038	Z033	475	13.7263	4.46291	61.6197	33.1987	80.7222	6.69347	11.3877	1.70235	42.314	54.7072	-25.1896
Z033E0039	Z033	476	12.4888	4.49512	55.6553	30.6876	83.0049	6.60123	10.5628	1.60158	36.8598	55.0778	-24.3207
Z033E0040	Z033	477	13.3008	4.60795	57.6547	31.787	81.2196	6.54368	10.9671	1.67853	39.2352	54.4712	-24.2083
Z033E0041	Z033	478	14.6042	4.72821	61.8929	32.8976	82.7229	6.94056	11.1301	1.61362	42.1825	56.3385	-25.1068
Z033E0042	Z033	479	14.71	4.56372	64.5018	34.2118	80.7088	6.78866	11.6391	1.71726	44.7289	55.319	-25.5547
Z033E0043	Z033	480	13.1604	4.58065	57.5402	32.3022	79.086	6.219	11.2638	1.81433	39.8932	52.9949	-23.8542
Z033E0044	Z033	481	12.2271	4.27441	57.2731	31.6324	81.2261	6.4714	10.7719	1.67084	38.4125	54.0359	-24.7183
Z033E0045	Z033	482	13.3638	4.49499	59.6083	32.145	83.5035	6.87155	10.7669	1.56757	39.8587	56.1349	-25.2388
Z033E0046	Z033	483	11.5121	3.97286	58.0498	31.9216	81.7267	6.55655	10.852	1.65757	38.5718	54.1277	-25.5304
Z033E0047	Z033	484	12.6254	4.50513	55.7108	30.9582	84.5291	6.73616	10.1973	1.51397	36.6072	56.1035	-24.6123
Z033E0048	Z033	485	12.1758	4.60177	52.885	29.7034	84.3554	6.52798	10.0766	1.5511	34.4099	55.5078	-23.8135
Z033E0049	Z033	486	13.8267	4.62112	59.7779	32.1076	80.6816	6.56325	11.2763	1.72264	40.8829	54.5115	-24.4324
Z033E0050	Z033	487	12.9567	4.24144	61.1132	33.2948	79.1411	6.45602	11.5627	1.79207	42.1591	53.3363	-25.1921
Z033E0051	Z033	488	10.6583	4.04153	52.4556	30.2776	81.8542	6.22152	10.2591	1.65095	34.3781	53.3007	-24.2517
Z033E0052	Z033	489	12.9517	4.58217	56.4297	31.9201	80.8219	6.38139	10.9046	1.71631	38.5934	53.9243	-23.9813
Z033E0053	Z033	490	13.53	4.12038	65.5793	34.5468	81.2819	6.85916	11.5419	1.68893	44.7526	55.3436	-26.7142
Z033E0054	Z033	491	12.4017	4.42928	56.096	31.3114	82.7177	6.51213	10.5696	1.6252	37.3781	54.8673	-24.5034
Z033E0055	Z033	492	14.755	4.83039	60.9169	32.5896	82.1211	6.72993	11.0847	1.64798	41.6894	55.8747	-24.5496
Z033E0056	Z033	493	12.6438	4.37897	57.6028	31.6209	81.9297	6.59924	10.8658	1.65103	38.6674	54.6488	-24.7243
Z033E0057	Z033	494	13.6163	4.33541	62.8184	33.5712	79.6757	6.57097	11.6294	1.77168	43.3236	54.0804	-25.4208
Z033E0058	Z033	495	8.4525	3.83137	44.1378	28.0476	82.1655	5.79698	9.5335	1.64623	27.9202	51.7785	-23.0044
Z033E0059	Z033	496	13.7525	4.78253	57.4586	31.7379	80.999	6.41286	10.9038	1.70277	39.297	54.4487	-23.7789
Z033E0060	Z033	497	13.325	4.44157	60.0494	32.6603	80.5091	6.54355	11.1602	1.7123	41.0418	54.2656	-24.8447
Z033E0061	Z033	498	13.1608	4.39935	60.076	32.9834	79.5763	6.45901	11.232	1.75846	41.355	53.6343	-24.796
Z033E0062	Z033	499	12.4621	4.38067	56.9553	30.8007	83.8997	6.76457	10.4564	1.54699	37.3133	55.7846	-24.9202
Z033E0063	Z033	500	13.2604	4.30338	61.6729	32.1241	84.9134	7.07832	10.6008	1.50225	40.4508	57.1978	-26.1713
Z033E0064	Z033	501	13.0846	4.17017	62.6778	33.4673	80.1218	6.60812	11.5236	1.75068	42.8465	54.1502	-25.7797
Z033E0065	Z033	502	13.0208	4.44037	58.6086	31.3731	85.074	7.08293	10.5427	1.49029	38.4783	56.9292	-25.4172
Z033E0066	Z033	503	12.8188	4.07263	62.9528	33.8225	79.9516	6.61088	11.6405	1.76072	43.1303	53.9574	-26.0327
Z033E0067	Z033	504	13.75	4.49785	61.1108	33.4833	80.1949	6.55973	11.415	1.7409	42.3164	54.2928	-24.9485
Z033E0068	Z033	505	11.4713	4.52493	50.6571	29.8962	79.438	6.00373	10.4424	1.73916	34.2346	52.0107	-22.6615
Z033E0069	Z033	506	10.8083	4.32903	49.918	29.3816	82.796	6.21437	10.0642	1.62007	32.521	53.6929	-23.4599
Z033E0070	Z033	507	12.3475	4.25262	58.1139	31.3063	83.3853	6.71499	10.6232	1.58351	38.2351	55.4962	-25.2777
Z033E0071	Z033	508	14.135	4.29981	65.8731	34.1122	81.0438	6.95455	11.7301	1.69647	45.0979	55.4901	-26.359
Z033E0072	Z033	509	14.4113	4.64633	62.1332	33.2199	80.7334	6.71985	11.4715	1.70949	42.9007	55.0139	-24.9294
Z033E0073	Z033	510	12.9308	4.43994	58.2724	32.5461	78.8785	6.35378	11.5012	1.81428	40.448	52.8807	-24.2523
Z033E0074	Z033	511	12.5225	4.17383	59.9355	32.7917	78.9353	6.31474	11.5031	1.82241	41.1589	52.8834	-24.9926
Z033E0075	Z033	512	13.5302	4.74445	57.2564	32.3051	79.731	6.29595	11.1729	1.77901	39.7567	53.5273	-23.6687
Z033E0076	Z033	513	12.2454	4.36989	55.9801	32.0114	79.4752	6.17681	11.0608	1.79406	38.4386	52.7299	-24.0171
Z033E0077	Z033	514	13.4917	4.53179	59.5454	32.1837	81.7504	6.78309	10.9733	1.62433	40.3446	55.1383	-24.8316
Z033E0078	Z033	515	12.5942	4.2408	59.4529	32.4229	79.8939	6.41692	11.2562	1.76466	40.4852	53.5036	-24.9529
Z033E0079	Z033	516	13.5242	4.40528	61.5558	32.8101	81.1345	6.72775	11.3552	1.6904	41.9164	54.8781	-25.3205
Z033E0080	Z033	517	10.5719	4.37044	48.2723	28.6182	81.7896	5.9298	9.8658	1.66427	31.3212	52.805	-22.7809
Z033E0082	Z033	519	12.8392	4.60366	55.9158	31.9131	81.5279	6.33373	10.705	1.69009	38.0464	54.2398	-23.9938
Z033E0083	Z033	520	11.4991	3.8394	59.9366	33.2648	80.993	6.78056	11.2806	1.66221	40.5204	53.9209	-26.1878
Z033E0085	Z033	521	9.5721	4.08396	46.7948	28.4791	80.1295	5.7525	10.0024	1.74094	30.5037	51.2408	-22.6822
Z033E0084	Z033	522	10.82	4.09178	52.414	29.8961	83.7928	6.45239	10.1115	1.57388	33.8193	54.5637	-24.5001
Z034E0001	Z034	523	14.0975	4.34471	63.0707	33.3346	80.1163	6.7193	11.6577	1.73671	43.4761	54.5681	-25.3964
Z034E0002	Z034	524	12.0798	4.50171	53.6885	31.0483	81.4355	6.31047	10.5799	1.67813	36.2053	53.7184	-23.7206
Z034E0003	Z034	525	13.585	4.25527	63.7815	33.7664	80.5799	6.75501	11.5974	1.72168	43.6968	54.7543	-25.944
Z034E0004	Z034	526	12.0567	4.02928	59.8548	32.9172	80.4604	6.48266	11.2277	1.73551	40.5702	53.679	-25.5823
Z034E0005	Z034	527	14.3983	4.62219	62.323	32.4903	83.6645	7.09709	10.9184	1.5447	41.8332	56.9524	-25.509
Z034E0007	Z034	529	13.1721	4.47842	58.7877	31.7334	83.4125	6.80666	10.7532	1.58115	39.188	55.9032	-25.0501
Z034E0008	Z034	530	12.3913	4.14209	59.6794	31.9912	81.9343	6.68079	10.9993	1.64716	39.8014	54.7624	-25.5273
Z034E0009	Z034	531	12.3808	4.40695	56.3346	31.6607	79.907	6.25699	11.006	1.75942	38.3926	53.1207	-24.069
Z034E0010	Z034	532	12.2267	4.30544	56.8591	31.9038	80.8359	6.44761	11.0036	1.73445	38.5456	53.699	-24.5679
Z034E0011	Z034	533	14.0858	4.33505	64.9643	33.9679	80.589	6.74921	11.6201	1.72173	44.5711	55.052	-25.9866
Z034E0012	Z034	534	12.04	4.51261	53.4946	31.0567	80.4138	6.1169	10.4276	1.70757	36.1944	53.0685	-23.4414
Z034E0013	Z034	535	12.3825	4.30989	57.4987	32.4074	78.9048	6.19185	11.2909	1.82473	39.6401	52.5692	-24.3079
Z034E0014	Z034	536	11.7783	4.08022	57.7684	32.116	79.8966	6.37705	11.2319	1.76375	39.1742	53.0213	-24.9522
Z034E0015	Z034	537	12.4675	4.42634	62.0538	33.2702	79.9778	6.61906	11.6545	1.76273	42.3195	53.8832	-25.6056
Z034E0016	Z034	538	13.4658	4.47461	60.309	32.9221	79.9963	6.50913	11.3514	1.74692	41.5446	54.0008	-24.7655
Z034E0017	Z034	539	13.2496	4.24381	62.5408	33.1669	81.0757	6.74213	11.4459	1.69999	42.4989	54.816	-25.8008
Z034E0018	Z034	540	11.2446	4.00059	56.4142	32.2548	78.3841	6.08738	11.2445	1.85252	38.6365	51.7012	-24.5725
Z034E0019	Z034	541	13.8767	4.64879	59.725	32.4031	81.9346	6.72684	11.019	1.64651	40.6733	55.3496	-24.6849
Z034E0020	Z034	542	12.6913	4.0769	62.1962	32.5589	81.2978	6.69477	11.3113	1.69187	41.6812	54.7022	-25.9915
Z034E0021	Z034	543	12.7516	4.27301	59.6229	32.2261	83.2175	6.84674	10.7852	1.57759	39.7079	55.725	-25.587
Z034E0022	Z034	544	12.1699	4.44639	54.739	31.1151	80.616	6.33258	10.5769	1.67222	36.9398	53.4303	-23.8348
Z034E0023	Z034	545	13.7033	4.26702	62.812	32.8785	83.7107	7.104	11.1213	1.56792	42.0464	56.6794	-26.2092
Z034E0024	Z034	546	12.3175	4.22511	58.382	31.8759	79.9921	6.41671	11.1636	1.74325	39.5289	53.3847	-24.7752
Z029E0014	Z029	547	13.2854	4.61496	57.7528	32.0613	82.4188	6.66272	10.8387	1.62751	39.1252	55.2164	-24.5086
Z034E0026	Z034	548	13.0329	4.13742	62.8291	33.13	80.9387	6.74396	11.4186	1.69526	42.5387	54.6934	-25.9949
Z034E0027	Z034	549	12.6358	4.00601	63.1761	33.0187	80.9877	6.83109	11.3573	1.66993	42.4598	54.6766	-26.3326
Z034E0028	Z034	550	14.3142	4.66169	61.3865	32.3479	83.3149	6.94649	10.9881	1.58781	41.3616	56.5417	-25.1789
Z034E0029	Z034	551	11.1258	4.34464	51.1326	29.595	84.6137	6.40121	9.6468	1.5112	32.7895	55.1081	-23.9899
Z034E0030	Z034	552	12.8183	4.21039	60.3004	32.5371	80.8317	6.62	11.2742	1.70673	40.8895	54.2738	-25.3277
Z034E0031	Z034	553	11.2617	4.08934	55.2722	32.0287	80.1036	6.2301	10.9142	1.76015	37.5072	52.6879	-24.5573
Z031E0020	Z031	554	12.9475	4.26332	60.8947	33.2564	80.7305	6.6481	11.3808	1.71381	41.6579	54.3206	-25.459
Z034E0033	Z034	555	14.4275	4.60637	62.8182	32.0482	85.5705	7.29749	10.8028	1.47986	41.4594	58.1781	-25.9472
Z034E0034	Z034	556	12.2233	4.26025	57.071	31.8489	79.4063	6.27735	10.9261	1.74786	38.8288	52.8813	-24.3436
Z034E0035	Z034	557	14.3138	4.52017	63.2867	33.2188	80.3437	6.64451	11.5336	1.74155	43.4976	54.8137	-25.2189
Z034E0036	Z034	558	14.3458	4.42821	64.8112	34.4471	80.3106	6.73623	11.6731	1.73281	44.9229	54.9587	-25.8033
Z034E0037	Z034	559	13.4813	4.57701	59.1749	32.0239	82.8677	6.78718	10.7962	1.59388	39.773	55.7487	-24.8865
Z034E0038	Z034	560	12.6679	4.46788	56.6743	32.1115	80.1338	6.26962	10.9968	1.76588	38.8471	53.3762	-24.0949
Z034E0039	Z034	561	13.9492	4.44515	63.0088	33.2465	81.7819	6.79008	11.2977	1.67151	42.8466	55.5645	-25.6394
Z034E0040	Z034	562	13.6881	4.72192	58.1829	32.4528	81.7399	6.64918	10.9824	1.65275	39.8969	55.0011	-24.3103
Z034E0041	Z034	563	11.52	4.36424	53.1829	30.1257	83.8352	6.50063	10.2091	1.57577	34.6457	54.9551	-24.2579
Z034E0042	Z034	564	12.0463	4.21579	57.2476	31.9989	80.9268	6.44468	10.8867	1.69942	38.617	53.7517	-24.8139
Z034E0043	Z034	565	13.4688	4.51504	59.8037	32.2025	83.7638	6.90972	10.7741	1.55968	39.9817	56.3508	-25.2932
Z034E0044	Z034	566	13.7058	4.45037	61.5061	33.1005	80.8773	6.71305	11.3645	1.70591	42.1662	54.7795	-25.1998
Z034E0045	Z034	567	13.1233	4.57708	57.838	31.5924	82.3115	6.54149	10.7755	1.65081	38.8355	55.0621	-24.488
Z034E0046	Z034	568	14.1288	4.54442	62.2543	33.4038	80.9488	6.76041	11.5415	1.71233	42.9283	55.0338	-25.2116
Z034E0047	Z034	569	12.3063	4.52866	54.37	30.9953	84.3097	6.77097	10.3243	1.52862	35.9776	55.7331	-24.3992
Z034E0048	Z034	570	13.1025	4.35201	60.2011	32.2979	82.1727	6.651	10.9657	1.6515	40.4268	55.1971	-25.294
Z034E0049	Z034	571	13.3075	4.27115	62.4683	33.4413	80.0986	6.66192	11.6144	1.746	42.8905	54.2183	-25.5901
Z031E0029	Z031	572	12.8846	4.29455	59.974	33.2011	79.1043	6.43047	11.5557	1.80346	41.546	53.1639	-24.9027
Z034E0050	Z034	573	13.6667	4.35823	62.7359	33.1243	80.334	6.64642	11.572	1.74163	42.9402	54.5089	-25.4439
Z034E0051	Z034	574	14.1383	4.51201	62.7404	33.6398	80.6166	6.70639	11.5613	1.72745	43.3426	54.8671	-25.2957
Z034E0052	Z034	575	12.4983	4.10337	60.7224	32.6656	81.7399	6.67436	11.1587	1.67234	40.7852	54.7437	-25.8033
Z034E0053	Z034	576	14.6008	4.83231	60.5412	32.4928	82.753	6.824	10.9234	1.61889	41.215	56.2128	-24.6409
Z034E0054	Z034	577	12.9592	4.78841	54.2101	31.3572	80.4674	6.19653	10.7722	1.74898	37.2486	53.4699	-23.1354
Z034E0055	Z034	578	13.0488	4.25189	61.5301	33.1689	77.9019	6.33059	11.5463	1.83019	42.5538	52.6849	-24.9674
Z034E0056	Z034	579	12.9167	4.219	61.278	31.8588	85.3392	7.19698	10.6216	1.47712	39.9386	57.3246	-26.3513
Z034E0057	Z034	580	13.63	4.32248	63.062	33.024	82.7596	6.94912	11.2122	1.61888	42.4179	56.0831	-26.0491
Z034E0058	Z034	581	12.2683	4.051	60.5398	32.7824	80.7783	6.58948	11.2658	1.71959	40.8939	54.0474	-25.7095
Z034E0059	Z034	582	12.8033	4.35603	58.7954	32.389	80.697	6.47803	11.1692	1.72863	40.0509	54.0088	-24.8004
Z034E0060	Z034	583	14.333	4.9209	58.4904	32.7771	80.2363	6.45192	11.1741	1.73436	40.8357	54.307	-23.716
Z034E0061	Z034	584	11.7471	4.18574	55.7518	31.4943	81.3683	6.37993	10.7613	1.69224	37.3704	53.7209	-24.6063
Z034E0062	Z034	585	13.5113	4.61519	58.6905	31.857	84.496	6.97247	10.671	1.53388	39.1203	56.7172	-25.0566
Z034E0063	Z034	586	13.015	4.43581	62.9664	33.5376	81.0536	6.77206	11.4606	1.69345	42.8184	54.8552	-25.8721
Z034E0064	Z034	587	12.1389	4.28407	56.7178	32.6991	79.5164	6.34962	11.1003	1.75489	39.1229	52.8666	-24.4408
Z034E0065	Z034	588	12.9692	4.2601	60.8589	32.9847	79.6991	6.45152	11.4494	1.77601	41.7217	53.6424	-25.1677
Z034E0066	Z034	589	14.779	4.65908	63.4005	32.8386	82.8308	7.027	11.1834	1.59064	42.9571	56.6445	-25.4661
Z034E0067	Z034	590	12.4363	4.18954	59.3343	32.2665	80.975	6.53937	11.1031	1.69945	40.0114	54.1241	-25.2275
Z034E0068	Z034	591	13.4717	4.3766	61.618	33.1924	81.6423	6.73588	11.1534	1.65623	41.9059	55.1829	-25.5126
Z034E0069	Z034	592	13.945	4.5148	61.8337	33.1572	79.6842	6.46364	11.5654	1.79352	42.7418	54.072	-24.8591
Z034E0070	Z034	593	13.5817	4.68213	57.9755	32.1082	80.6999	6.47408	11.0676	1.71866	39.8056	54.2577	-24.0515
Z034E0071	Z034	594	12.3114	4.1963	58.6279	32.0623	81.311	6.53151	10.9719	1.68038	39.3899	54.2194	-25.1393
Z034E0072	Z034	595	12.65	4.15181	60.9118	32.8134	81.1131	6.69677	11.2417	1.6829	41.186	54.4795	-25.6739
Z034E0073	Z034	596	13.0621	4.34105	60.1394	32.5345	80.4193	6.50954	11.2705	1.73799	40.9783	54.0767	-24.9941
Z034E0074	Z034	597	9.8449	3.60366	52.9141	30.9124	81.0392	6.07727	10.4964	1.7268	34.8077	52.4013	-24.8875
Z034E0075	Z034	598	13.6488	4.79327	57.3157	31.7384	80.3094	6.39399	11.0875	1.73876	39.4181	53.9803	-23.6546
Z034E0076	Z034	599	15.1288	4.66871	64.6604	33.5048	80.8003	6.80773	11.3803	1.67475	44.4895	55.6254	-25.2797
Z034E0077	Z034	600	13.7796	4.35692	63.5548	33.6061	80.8669	6.77867	11.5325	1.70452	43.5089	54.9993	-25.7803
Z034E0078	Z034	601	12.8933	4.60025	56.0333	31.11	80.6006	6.36976	10.945	1.72354	38.0502	53.7464	-23.7519
Z034E0079	Z034	602	13.6221	4.39452	62.0689	32.8128	82.0277	6.843	11.233	1.64296	41.9806	55.5363	-25.5941
Z034E0080	Z034	603	15.0321	4.64428	64.653	33.9114	80.7915	6.77368	11.6335	1.72187	44.7664	55.4914	-25.3784
Z034E0081	Z034	604	14.1942	4.59582	61.8697	33.1902	80.2042	6.61083	11.4555	1.73562	42.7482	54.5652	-24.8571
Z034E0082	Z034	605	11.8025	4.21305	56.1865	31.2304	80.947	6.3825	10.8441	1.7032	37.6002	53.5576	-24.5524
Z034E0083	Z034	606	14.2117	4.64611	61.2836	33.0926	79.8077	6.4667	11.5063	1.78194	42.5095	54.2067	-24.5562
Z034E0084	Z034	607	12.4992	4.06395	61.5185	33.1401	79.889	6.58992	11.5377	1.75408	41.9439	53.6875	-25.7316
Z034E0085	Z034	608	14.16	4.42179	64.0457	33.9661	80.1699	6.701	11.7396	1.75398	44.3047	54.7083	-25.6093
Z034E0086	Z034	609	12.8408	4.23867	60.559	32.9753	79.7823	6.48423	11.4549	1.76722	41.5138	53.6281	-25.19
Z034E0087	Z034	610	12.6863	4.17651	60.6643	32.2174	82.6347	6.83448	10.8372	1.58663	40.3084	55.4717	-25.806
Z034E0088	Z034	611	13.8946	4.5031	61.6628	33.4723	80.558	6.62444	11.4583	1.74068	42.595	54.6145	-25.0933
Z031E0075	Z031	612	13.5583	4.5214	59.9638	33.0525	80.662	6.621	11.3191	1.71144	41.3547	54.4277	-24.7915
Z034E0090	Z034	613	12.345	4.42916	55.9086	31.9775	79.4101	6.27019	11.1956	1.78891	38.5316	52.7559	-23.9387
Z034E0091	Z034	614	13.3613	4.32576	61.8409	33.0717	82.2693	6.77752	11.1556	1.65025	41.7884	55.5183	-25.7431
Z034E0092	Z034	615	11.885	4.30712	55.17	30.6696	82.0326	6.42115	10.51	1.64006	36.5006	54.1854	-24.3473
Z034E0093	Z034	616	13.5592	4.3879	61.8402	33.3959	81.3818	6.82528	11.3286	1.66542	42.3071	55.1015	-25.5369
Z031E0501	Z031	617	12.3004	4.28016	57.4502	32.0149	82.2242	6.64002	10.8129	1.62904	38.5639	54.6946	-25.0076
Z031E0502	Z031	618	13.0571	4.30293	60.6485	33.0758	80.0129	6.56615	11.5039	1.75641	41.6912	53.8745	-25.1639
Z031E0503	Z031	619	13.0641	4.6482	56.234	31.8059	80.8561	6.38153	10.9566	1.71868	38.5122	53.9621	-23.8398
Z031E0504	Z031	620	13.1333	4.29523	61.2075	33.1821	80.0751	6.57522	11.4523	1.74513	42.0019	54.0098	-25.29
Z031E0505	Z031	621	10.9567	3.82831	56.601	32.0336	80.0806	6.28492	11.0044	1.74981	38.0616	52.6818	-25.1762
Z031E0506	Z031	622	13.7133	4.36376	62.9175	34.3945	79.6157	6.67335	11.7664	1.76903	43.9154	54.1077	-25.5244
Z031E0507	Z031	623	14.4721	5.0119	56.3528	31.3862	88.5184	7.24947	9.7846	1.35059	36.9854	59.3555	-24.6013
Z031E0508	Z031	624	12.48	4.3455	57.3842	31.9288	80.8215	6.4654	11.0263	1.70659	38.9243	53.8546	-24.5724
Z031E0509	Z031	625	11.83	4.07232	57.1607	31.7197	81.6552	6.49313	10.7871	1.66147	38.1528	54.0881	-25.0894
Z031E0510	Z031	626	12.7546	4.34397	58.8581	32.2672	80.6057	6.48692	11.1143	1.72449	39.9951	53.969	-24.8088
Z031E0511	Z031	627	12.0542	4.18697	57.6275	32.5823	79.9142	6.3712	11.1855	1.75595	39.4236	53.1261	-24.8044
Z031E0512	Z031	628	11.4975	4.04435	56.6226	32.2762	80.401	6.3718	10.9942	1.72705	38.3685	53.1217	-24.936
Z031E0513	Z031	629	12.825	4.37009	58.6867	32.6763	81.1363	6.52865	11.0586	1.69612	40.0135	54.2952	-24.8879
Z031E0514	Z031	630	12.3925	4.18653	59.1139	33.5197	77.5991	6.2376	11.7685	1.89371	41.464	51.9142	-24.7004
Z031E0515	Z031	631	14.3633	4.80096	59.8574	32.9205	80.8133	6.63185	11.3091	1.70734	41.547	54.8168	-24.2761
Z031E0516	Z031	632	11.7375	4.04508	58.0059	32.064	82.181	6.65652	10.8527	1.63179	38.6435	54.5062	-25.5159
Z031E0517	Z031	633	13.025	4.64999	56.4722	32.3219	81.7477	6.521	10.8064	1.65981	38.6327	54.5669	-24.1691
Z031E0518	Z031	634	13.91	4.73427	58.7265	32.6959	82.4765	6.6707	10.8387	1.62649	40.1461	55.5663	-24.5024
Z031E0519	Z031	635	9.5058	3.57469	52.7068	30.7934	80.534	6.13797	10.587	1.72665	34.6743	52.0205	-24.9035
Z031E0520	Z031	636	12.7	4.44987	57.1679	31.3152	82.3544	6.58902	10.7409	1.63233	38.1868	54.8922	-24.5801
Z031E0521	Z031	637	13.2783	4.41977	59.8733	32.4647	80.8273	6.6435	11.2706	1.70278	40.8535	54.4288	-24.9054
Z031E0522	Z031	638	13.6554	4.3108	63.594	33.8449	79.9637	6.69437	11.7061	1.74906	43.8446	54.379	-25.7227
Z031E0523	Z031	639	10.5967	4.05379	52.1981	30.1373	82.5942	6.35742	10.1837	1.60669	34.0027	53.7517	-24.3598
Z031E0524	Z031	640	13.275	4.48689	59.2214	32.7697	79.9864	6.42895	11.2577	1.75446	40.816	53.796	-24.538
Z031E0525	Z031	641	11.43	3.92942	57.7762	32.4619	80.9386	6.48005	10.9392	1.70159	38.8603	53.559	-25.4485
Z031E0526	Z031	642	12.675	4.18567	59.7322	32.278	83.5985	6.88686	10.6945	1.55248	39.6335	55.9393	-25.7918
Z031E0527	Z031	643	12.2504	4.62563	53.2746	30.4553	83.5563	6.49807	10.2075	1.57663	35.2154	55.0957	-23.81
Z031E0528	Z031	644	12.975	4.54543	56.8755	32.1269	79.4412	6.2465	11.0882	1.77965	39.2595	53.1083	-23.8482
Z031E0529	Z031	645	13.4641	4.31001	62.5479	33.674	80.8106	6.64858	11.4255	1.71913	42.8642	54.698	-25.6664
Z031E0530	Z031	646	11.7717	4.20732	55.9156	31.1259	81.8173	6.47337	10.5101	1.62729	37.0804	54.1212	-24.6689
Z031E0531	Z031	647	13.0097	4.2867	60.6702	33.4981	78.352	6.36735	11.6966	1.83775	42.2823	52.8022	-24.908
Z031E0532	Z031	648	13.1392	4.35034	60.2774	33.4753	79.4669	6.4431	11.457	1.77978	41.8077	53.5114	-24.9367
Z031E0533	Z031	649	12.5913	4.26846	58.8779	32.5077	80.6353	6.49045	11.1114	1.71218	40.0424	53.9232	-24.9716
Z031E0535	Z031	650	12.8654	4.10025	62.8893	34.3171	78.44	6.49145	11.8497	1.83482	43.7528	53.0309	-25.7515
Z031E0536	Z031	651	12.0063	4.32931	55.3613	30.8229	82.4761	6.49887	10.5306	1.62163	36.652	54.5232	-24.4519
Z031E0537	Z031	652	11.5683	4.72768	49.0098	28.7938	84.8403	6.42155	9.7204	1.51481	31.586	55.2262	-23.0136
Z031E0538	Z031	653	11.1758	4.05222	55.188	31.1249	82.519	6.5698	10.5486	1.60731	36.3807	54.2419	-24.9988
Z031E0539	Z031	654	12.7846	4.32294	59.1852	32.7064	80.8124	6.49517	11.1833	1.72288	40.3679	54.1036	-24.9862
Z031E0540	Z031	655	13.2567	4.65242	56.9086	32.4234	84.0843	6.87376	10.5169	1.53865	38.4358	56.2006	-24.7047
Z031E0541	Z031	656	14.92	4.62699	64.6175	34.8462	82.1906	7.07035	11.5649	1.63756	44.9006	56.3723	-25.8885
Z031E0542	Z031	657	13.3592	4.31615	61.9917	33.4515	80.4738	6.6305	11.477	1.73444	42.5408	54.4049	-25.486
Z031E0543	Z031	658	12.5375	4.09466	60.9588	33.0818	81.0012	6.61695	11.2594	1.70084	41.3048	54.3222	-25.7605
Z031E0544	Z031	659	12.6708	4.46007	56.8653	32.0743	82.4727	6.64015	10.7981	1.62656	38.4168	54.9187	-24.6598
Z031E0545	Z031	660	13.8683	4.40855	63.0108	33.3646	81.982	6.81897	11.2801	1.65916	42.8261	55.6583	-25.7575
Z031E0546	Z031	661	11.7183	4.30784	54.4961	30.7806	82.2704	6.40367	10.5381	1.64735	36.1293	54.1665	-24.3112
Z031E0547	Z031	662	14.5629	4.55566	63.9137	33.6869	81.1443	6.86105	11.5964	1.69423	44.0387	55.4993	-25.5133
Z031E0548	Z031	663	11.6225	3.96968	58.6774	32.5409	79.7604	6.37757	11.2853	1.77377	39.7993	52.9571	-25.3241
Z031E0549	Z031	664	13.5675	4.39268	61.6727	33.4198	80.2805	6.62665	11.4947	1.74204	42.5103	54.3385	-25.2455
Z031E0550	Z031	665	14.8517	4.64482	64.1192	33.9811	83.7944	7.2391	11.285	1.55957	43.784	57.3338	-25.998
Z031E0551	Z031	666	13.0467	4.30639	60.4163	32.9922	80.398	6.55677	11.2854	1.72428	41.3454	54.1026	-25.1622
Z031E0552	Z031	667	13.8183	4.41883	62.59	33.7265	81.4643	6.80435	11.3783	1.67417	42.9341	55.2859	-25.6356
Z031E0553	Z031	668	12.6933	4.56202	55.6506	31.6498	82.6082	6.5551	10.5336	1.61078	37.4701	54.9084	-24.2415
Z031E0556	Z031	669	11.0333	4.07211	53.2839	30.6136	81.5058	6.31417	10.4773	1.65741	35.2872	53.3233	-24.297
Z031E0557	Z031	670	13.0292	4.54934	57.4912	32.696	78.7201	6.17037	11.3276	1.83942	40.1046	52.6952	-23.8896
Z031E0558	Z031	671	13.2467	4.91826	53.9646	33.1837	81.3746	6.30641	10.5195	1.68347	37.8568	54.1436	-23.3138
Z031E0559	Z031	672	12.2567	4.26196	57.4511	32.8342	80.3254	6.43341	11.1143	1.733	39.4424	53.4527	-24.7598
Z031E0560	Z031	673	11.23	4.18734	53.537	30.878	80.5715	6.26952	10.7687	1.71941	35.952	52.838	-24.0554
Z031E0561	Z031	674	13.1625	4.29077	61.3325	33.4596	79.4889	6.47667	11.5856	1.79016	42.3745	53.6223	-25.2171
Z031E0562	Z031	675	11.3017	4.11276	54.8483	31.0149	82.7259	6.55037	10.5365	1.60955	36.1676	54.3586	-24.8477
Z031E0563	Z031	676	11.5891	4.27003	54.2333	31.8184	78.6728	5.97508	10.9387	1.83225	37.3058	51.7967	-23.7173
Z031E0566	Z031	677	12.702	4.49423	56.7569	31.6892	83.3892	6.71047	10.5364	1.57126	37.8886	55.5258	-24.7203
Z031E0567	Z031	678	11.53	4.20213	54.8356	31.7938	78.0615	6.01792	11.245	1.87875	37.8417	51.4475	-23.8321
Z031E0568	Z031	679	12.7008	4.12382	61.6656	33.6173	79.3284	6.52292	11.6553	1.78852	42.4909	53.404	-25.5937
Z031E0569	Z031	680	12.0542	4.31738	55.9451	31.0662	81.9974	6.54155	10.7202	1.64522	37.2695	54.3177	-24.538
Z031E0570	Z031	681	10.3388	4.30329	47.9867	29.0945	80.5663	5.94832	10.2204	1.71877	31.7521	51.9473	-22.7238
Z031E0571	Z031	682	12.9942	4.37295	59.4125	33.4064	79.7474	6.53805	11.4288	1.74923	41.2536	53.5918	-24.8551
Z031E0573	Z031	683	11.4542	4.30679	53.3079	31.6421	77.4384	5.80467	11.0627	1.90812	37.0096	50.8689	-23.2445
Z031E0574	Z031	684	12.9856	4.1444	62.7759	33.8557	80.7421	6.73796	11.5103	1.7092	42.9334	54.5335	-26.0593
Z031E0575	Z031	685	12.715	4.21986	60.3987	33.4107	79.4266	6.5008	11.5313	1.77418	41.7123	53.3636	-25.2203
Z031E0576	Z031	686	12.4313	3.99959	62.0388	33.8662	78.5976	6.42522	11.7638	1.83978	42.8592	52.8513	-25.7429
Z031E0577	Z031	687	11.465	4.12065	55.5879	31.1146	82.0463	6.46975	10.6086	1.6443	36.7929	54.063	-24.8132
Z031E0578	Z031	688	11.3988	4.22718	53.879	31.4063	80.9971	6.2105	10.6065	1.70843	36.2621	53.1611	-24.1587
Z031E0579	Z031	689	12.7861	4.2745	59.9935	32.9268	77.9752	6.17293	11.3787	1.8474	41.4701	52.4275	-24.6346
Z031E0580	Z031	690	13.1967	4.43981	59.4812	32.5076	81.5538	6.59715	11.0807	1.6804	40.4026	54.7736	-24.9446
Z031E0581	Z031	691	13.8975	4.23725	65.4075	34.6557	80.1674	6.75045	11.7744	1.74362	45.199	54.7485	-26.2504
Z031E0582	Z031	692	12.83	4.14805	62.2339	33.5538	80.5518	6.69595	11.4976	1.71783	42.49	54.3096	-25.9066
Z031E0583	Z031	693	15.7154	4.31678	72.756	36.3376	80.0759	7.11235	12.3956	1.74878	50.6545	56.123	-27.4709
Z031E0584	Z031	694	12.1267	4.40969	54.7715	31.3986	80.3728	6.25347	10.8402	1.7403	37.2415	53.1562	-23.8603
Z031E0585	Z031	695	11.5888	4.49394	51.8465	29.6104	83.8259	6.44897	10.0455	1.56217	33.7033	54.8731	-23.7526
Z031E0586	Z031	696	13.5733	4.35289	62.4343	33.6521	79.9092	6.57455	11.5987	1.76613	43.102	54.1609	-25.3911
Z031E0587	Z031	697	12.3458	4.26297	57.8429	31.5728	83.1103	6.6668	10.6424	1.59866	38.2919	55.2832	-25.1855
Z031E0588	Z031	698	12.85	4.23399	60.5648	32.9177	79.4669	6.37725	11.4839	1.805	41.5501	53.3883	-25.0932
Z031E0589	Z031	699	12.9613	4.19992	61.748	33.2882	79.5704	6.55267	11.6653	1.78398	42.4412	53.6576	-25.4664
Z031E0590	Z031	700	13.76	4.76407	58.0821	32.4211	82.4576	6.6349	10.8325	1.64056	39.6421	55.4289	-24.3386
Z031E0591	Z031	701	12.6662	4.13904	61.2786	33.6049	81.2543	6.74309	11.387	1.6925	41.8058	54.5753	-25.9072
Z031E0592	Z031	702	13.4521	4.64384	57.7407	31.9646	81.2383	6.59257	10.8647	1.64918	39.38	54.5991	-24.1876
Z031E0593	Z031	703	13.0875	4.531	57.8125	32.4925	78.6223	6.2428	11.4023	1.83749	40.2536	52.717	-23.9338
Z031E0594	Z031	704	13.1795	4.4431	59.2846	32.9004	81.8074	6.75326	11.0324	1.63414	40.4498	54.9817	-25.055
Z031E0595	Z031	705	11.943	4.17882	57.0401	32.4494	78.0754	6.13413	11.3701	1.85692	39.4557	51.855	-24.3134
B73	.	725	13.3194	4.30643	61.7695	33.3943	79.6351	6.52984	11.5803	1.77845	42.5934	53.8329	-25.2769
Z037E0001	Z037	801	9.4517	3.62018	51.435	30.1599	81.6763	6.05524	10.0965	1.66638	33.244	52.566	-24.6865
Z037E0002	Z037	802	13.5567	5.19202	52.5003	31.1364	79.0708	5.93671	10.8144	1.82199	36.8461	52.6555	-21.8822
Z037E0003	Z037	803	12.7517	4.26004	60.2098	33.3072	79.3677	6.42224	11.4864	1.79125	41.5635	53.2964	-25.0822
Z037E0004	Z037	804	14.0817	4.35036	64.8005	33.8724	79.9324	6.71899	11.8098	1.75801	44.6689	54.6228	-25.8094
Z037E0005	Z037	805	13.6817	4.25324	64.4452	34.4252	79.6789	6.71922	11.8848	1.76957	44.6922	54.2771	-25.9838
Z037E0006	Z037	806	13.4167	4.35111	61.75	33.3678	79.0823	6.5988	11.761	1.78225	42.8293	53.5775	-25.1336
Z037E0007	Z037	807	14.2917	4.39536	65.1758	33.6981	83.2278	7.13343	11.212	1.57772	43.9654	56.8839	-26.4448
Z037E0008	Z037	808	12.5767	4.13678	60.8878	32.3814	80.951	6.69362	11.3337	1.69555	41.0118	54.348	-25.6211
Z037E0009	Z037	809	12.6167	4.47087	56.5022	31.3584	82.5331	6.5628	10.696	1.63545	37.7955	54.885	-24.476
Z037E0010	Z037	810	12.5517	4.88252	51.4919	30.492	80.4609	6.07344	10.5312	1.74255	35.2311	53.0652	-22.4559
Z037E0011	Z037	811	12.6767	4.29491	59.0422	32.1769	78.8116	6.23495	11.3002	1.81506	40.4113	52.8063	-24.5147
Z037E0012	Z037	812	12.7817	4.38546	58.7064	32.3157	82.1836	6.637	10.8832	1.64342	39.5516	54.9603	-25.057
Z037E0013	Z037	813	11.4167	4.27224	53.2306	31.063	77.9814	5.89545	11.0745	1.88001	36.5857	51.1908	-23.3155
Z037E0014	Z037	814	11.1417	4.02087	55.4237	31.425	79.2595	6.10188	11.0299	1.80848	37.4359	52.1076	-24.4195
Z037E0015	Z037	815	11.7667	3.85513	61.1704	32.3611	80.529	6.55727	11.0716	1.68885	40.719	53.8329	-26.0623
Z037E0016	Z037	816	15.4094	4.85504	63.531	32.5726	84.2531	7.20252	10.9526	1.52113	42.787	57.8137	-25.3774
Z037E0017	Z037	817	13.2117	4.44715	59.5069	32.7779	83.3824	6.82001	10.8289	1.59312	40.101	55.9424	-25.3569
Z037E0018	Z037	818	13.4867	4.3899	61.4923	33.0824	77.7183	6.29963	11.4251	1.81319	42.6468	52.766	-24.6418
Z037E0019	Z037	819	13.3517	4.42899	60.3633	32.5008	80.8761	6.53123	11.2157	1.71746	41.0727	54.4837	-24.9514
Z037E0020	Z037	820	11.3067	4.04308	55.963	31.0438	79.5486	6.26616	11.1085	1.77315	37.5872	52.4649	-24.5156
Z037E0021	Z037	821	13.2417	4.19168	63.3053	33.8152	80.3777	6.71329	11.6359	1.73485	43.4037	54.4416	-25.9718
Z037E0022	Z037	822	13.0767	4.59905	56.8983	31.6876	80.8526	6.43226	10.9196	1.69814	38.7643	54.0703	-24.017
Z037E0023	Z037	823	11.6867	4.93498	47.2838	28.3095	85.3613	6.26318	9.3	1.48673	30.2389	55.4195	-22.3986
Z037E0024	Z037	824	12.3267	4.21678	58.5341	32.0681	82.2349	6.62236	10.882	1.6443	39.141	54.7854	-25.2847
Z037E0025	Z037	825	10.6317	4.05304	52.5678	31.2476	79.3014	6.10517	10.9095	1.78928	35.7199	51.6986	-23.9436
Z037E0026	Z037	826	12.4867	4.06637	61.5165	33.4501	78.5396	6.37131	11.7289	1.84063	42.4161	52.7823	-25.4744
Z037E0027	Z037	827	11.4717	4.86899	47.0045	28.4013	82.9948	6.05751	9.7564	1.61341	30.7309	53.8071	-22.0141
Z037E0028	Z037	828	13.0067	4.41269	59.0057	32.1986	81.2793	6.58459	10.9411	1.66336	39.9309	54.545	-24.8349
Z037E0029	Z037	829	11.1842	4.523	49.4629	28.6641	78.8938	5.75348	10.1206	1.75919	32.8493	51.4517	-22.1548
Z037E0030	Z037	830	9.9267	4.08568	48.3273	29.1498	82.7563	6.06981	9.7916	1.61529	31.1233	53.1523	-23.5299
Z037E0031	Z037	831	8.0567	3.42323	47.1067	28.6401	81.6413	5.7737	9.7347	1.68718	29.6403	51.5359	-24.0899
Z037E0032	Z037	832	12.1767	4.52416	53.8145	31.5973	78.5734	6.032	10.9825	1.8204	37.3039	51.9656	-23.1937
Z037E0033	Z037	833	10.8117	4.01427	53.6585	31.0057	82.6605	6.37216	10.3446	1.62383	35.2743	53.9606	-24.7666
Z037E0034	Z037	834	12.2194	3.9766	61.4554	32.9397	81.3072	6.70772	11.3117	1.68731	41.3194	54.46	-26.136
Z037E0035	Z037	835	14.1517	4.58935	61.6153	33.6211	79.4106	6.53374	11.6977	1.78991	43.0872	53.9859	-24.7252
Z037E0036	Z037	836	13.6967	4.51191	60.8388	32.7347	82.5135	6.78823	11.053	1.62867	41.1941	55.7209	-25.2615
Z037E0037	Z037	837	12.8267	4.48797	57.2914	31.7195	81.0806	6.46064	10.854	1.68729	38.787	54.1638	-24.3271
Z037E0038	Z037	838	11.3717	4.26546	53.3998	30.9366	78.3848	6.01707	10.9169	1.81739	36.4478	51.5307	-23.4639
Z037E0039	Z037	839	14.5394	5.45331	53.2783	31.1769	83.0376	6.54267	10.4441	1.59741	36.7736	55.6697	-22.381
Z037E0040	Z037	840	11.7867	4.15593	56.7702	31.9975	79.5416	6.27013	11.1395	1.77723	38.6539	52.7031	-24.5605
Z037E0041	Z037	841	13.4817	4.84596	55.6338	31.2962	80.5474	6.27241	10.7967	1.72146	38.1184	53.8899	-23.2456
Z037E0042	Z037	842	13.3017	4.00133	66.6198	34.2541	81.9753	7.08589	11.7117	1.65357	44.9954	55.8316	-27.2705
Z037E0043	Z037	843	11.1917	4.52268	49.4646	29.4096	83.9723	6.28836	9.8539	1.56828	32.1549	54.5276	-23.2996
Z037E0044	Z037	844	14.0167	4.4655	62.9084	33.7642	80.4338	6.65439	11.4766	1.72784	43.4154	54.7306	-25.3772
Z037E0045	Z037	845	12.2467	4.37518	56.0182	31.5613	82.0162	6.45273	10.5257	1.63202	37.5055	54.4001	-24.4777
Z037E0046	Z037	846	11.7367	4.16854	56.629	30.866	81.9416	6.51507	10.7554	1.65208	37.3829	54.2149	-24.8694
Z037E0047	Z037	847	11.5567	4.88514	47.3238	29.0011	82.9099	6.05609	9.7172	1.60694	31.2075	53.8286	-22.1054
Z037E0048	Z037	848	8.324	3.39661	49.1949	29.717	82.171	6.02791	9.8787	1.63834	31.2794	52.2298	-24.7908
Z037E0049	Z037	849	14.1417	4.62702	61.1856	32.8328	80.8726	6.63479	11.3193	1.70655	42.0293	54.8903	-24.7756
Z037E0050	Z037	850	13.9917	4.40936	63.212	33.3146	80.087	6.60871	11.6049	1.75588	43.4521	54.5063	-25.3634
Z037E0051	Z037	851	13.3967	4.83517	55.4666	31.2799	79.8255	6.27485	11.0021	1.75432	38.2474	53.4084	-23.1274
Z037E0052	Z037	852	12.5567	4.25413	59.1502	31.8035	82.6541	6.78947	10.9381	1.61427	39.3774	55.244	-25.3992
Z037E0053	Z037	853	15.1917	4.86166	62.6649	33.1701	82.7169	7.03076	11.2391	1.59928	42.9996	56.6569	-25.031
Z037E0054	Z037	854	11.8617	4.42399	53.5323	31.6033	80.3808	6.23436	10.7046	1.72096	36.572	52.9679	-23.697
Z037E0055	Z037	855	12.6267	4.79639	52.6814	29.2358	86.8868	6.79019	9.4815	1.40257	33.5187	57.3256	-23.9006
Z037E0056	Z037	856	16.5167	5.07838	65.1087	33.9886	82.5506	7.01366	11.3483	1.61979	45.1919	57.2403	-24.998
Z037E0057	Z037	857	13.1517	4.7847	55.0174	30.3263	86.1327	6.88351	10.0339	1.46197	35.8219	57.2389	-24.289
Z037E0058	Z037	858	13.4017	4.65687	57.5224	31.8094	84.3046	6.81821	10.4119	1.53034	38.3765	56.438	-24.7158
Z037E0059	Z037	859	12.2267	4.72696	51.6855	29.4011	84.2864	6.4466	9.982	1.55112	33.669	55.3666	-23.3579
Z037E0060	Z037	860	11.1317	3.955	56.3396	31.7781	79.8095	6.26459	11.1047	1.77241	37.9931	52.5596	-24.8711
Z037E0061	Z037	861	12.6117	4.36333	57.8358	31.4612	81.7364	6.66573	10.8801	1.63407	38.7461	54.6008	-24.7664
Z037E0062	Z037	862	14.0367	4.50078	62.6777	33.6096	78.3381	6.39669	11.8752	1.86373	43.8173	53.3485	-24.8326
Z037E0063	Z037	863	11.4067	4.45552	51.1128	29.7816	81.4208	6.23384	10.3757	1.66597	33.9739	53.2341	-23.2375
Z037E0064	Z037	864	12.7517	4.40592	58.0036	32.5271	80.3037	6.34707	11.0811	1.74591	39.7327	53.6515	-24.515
Z037E0065	Z037	865	12.6717	4.91981	51.4827	29.7645	80.6713	5.90025	10.315	1.74931	34.7347	53.1858	-22.2566
Z037E0066	Z037	866	12.0867	4.29944	56.2805	32.5355	82.5093	6.56313	10.6373	1.62342	38.0151	54.6442	-24.906
Z037E0067	Z037	867	12.2717	4.27247	57.5193	31.3768	80.4611	6.42415	11.0756	1.72668	38.7213	53.5693	-24.5822
Z037E0068	Z037	868	13.3717	4.26393	63.0537	33.8023	79.0328	6.57723	11.7522	1.79177	43.64	53.6444	-25.5389
Z037E0069	Z037	869	12.2867	4.91433	49.9464	29.3508	82.7548	6.25076	10.1023	1.61884	33.1858	54.2775	-22.483
Z037E0070	Z037	870	10.2067	4.03165	50.6116	29.3318	83.8419	6.27694	9.8342	1.56782	32.2499	54.1681	-24.2445
Z037E0071	Z037	871	12.3267	4.47766	55.0299	31.1908	82.1508	6.49064	10.5451	1.62885	36.8842	54.4309	-24.1422
Z037E0072	Z037	872	13.0017	4.22433	61.7326	32.898	82.8319	6.91438	11.0885	1.60438	41.3808	55.7755	-26.044
Z037E0073	Z037	873	14.4167	5.16992	55.7643	31.4933	83.0235	6.61906	10.6318	1.60732	38.1559	55.8249	-23.2524
Z037E0074	Z037	874	12.5267	4.18467	59.9755	32.4022	80.9694	6.56927	11.0818	1.68751	40.4148	54.2423	-25.3641
Z037E0075	Z037	875	13.6217	4.19084	65.1493	33.8121	81.2311	6.95725	11.5692	1.66342	44.2741	55.3804	-26.4606
Z037E0076	Z037	876	13.6467	4.8168	56.7405	30.9401	82.4432	6.60197	10.6796	1.61946	38.1576	55.2957	-23.8328
Z037E0077	Z037	877	14.5517	5.07317	57.4279	31.0169	84.9418	6.9453	10.4926	1.5166	38.3714	57.2775	-24.0065
Z037E0078	Z037	878	11.764	4.13338	57.0695	31.8606	81.2111	6.67966	10.9889	1.64535	38.3856	53.9006	-25.0541
Z037E0079	Z037	879	14.8117	4.58053	64.7537	33.4199	81.8571	7.01691	11.5475	1.64799	44.2716	56.1631	-25.7234
Z038E0001	Z038	880	11.0867	3.75608	56.5569	31.9852	79.9518	6.18446	11.0195	1.78016	38.0783	52.5577	-25.1182
Z038E0002	Z038	881	12.6217	4.52184	55.79	31.8171	80.4761	6.34442	10.8704	1.71363	38.1469	53.5477	-23.923
Z038E0003	Z038	882	14.6867	4.962	59.4423	31.54	82.7788	6.76624	10.8995	1.61151	40.2378	56.1573	-24.1305
Z038E0004	Z038	883	11.9967	3.87316	62.0793	34.0213	78.6104	6.4699	11.4217	1.76566	42.6036	52.8231	-26.0374
Z038E0005	Z038	884	14.7867	4.72497	62.6704	33.0778	82.8039	6.92013	11.1467	1.61485	42.6996	56.5062	-25.2448
Z038E0006	Z038	885	12.9894	4.28376	60.6149	32.7992	81.3376	6.6696	11.2583	1.689	41.139	54.6795	-25.4149
Z038E0007	Z038	886	14.1467	4.448	63.6966	34.1615	80.8538	6.82146	11.5661	1.69696	44.0282	55.1487	-25.6991
Z038E0008	Z038	887	12.1367	4.08416	61.4035	31.9051	80.4325	6.6841	10.7669	1.61136	40.6629	54.1464	-25.7567
Z038E0009	Z038	888	10.0817	4.46507	45.1111	27.8298	83.0503	6.0721	9.5414	1.57246	28.8503	53.1799	-22.3517
Z038E0010	Z038	889	10.8967	4.01348	54.336	31.3565	80.5037	6.2085	10.6751	1.72036	36.3747	52.7296	-24.5119
Z038E0011	Z038	890	11.6717	3.85838	60.6005	32.7588	80.7174	6.59635	11.2515	1.70691	40.6644	53.8097	-26.0743
Z038E0012	Z038	891	12.8967	4.20794	61.3943	33.0353	81.488	6.64051	11.2569	1.69549	41.5454	54.7805	-25.7218
Z038E0013	Z038	892	11.8317	4.28014	55.1307	31.1992	80.6579	6.27088	10.7797	1.72124	37.1024	53.2595	-24.1706
Z038E0014	Z038	893	13.0867	4.35712	60.1376	33.0127	81.5054	6.77589	11.2739	1.66457	41.0551	54.8188	-25.3146
Z038E0015	Z038	894	11.0467	3.88778	56.961	32.1168	82.5241	6.63972	10.6329	1.60217	37.701	54.3707	-25.7149
Z038E0016	Z038	895	13.4117	4.80141	55.9965	31.7848	79.6591	6.23875	11.0288	1.76959	38.7899	53.3383	-23.2904
Z038E0017	Z038	896	13.7417	5.04919	54.4818	32.4576	78.9068	6.03596	10.943	1.81297	38.6155	52.8167	-22.5447
Z038E0018	Z038	897	13.6867	4.39302	62.4048	34.0289	79.7849	6.58759	11.6324	1.76584	43.3642	54.1298	-25.3488
Z038E0019	Z038	898	12.1467	4.43907	54.7338	31.2083	80.2508	6.16001	10.7974	1.75344	37.1242	53.0614	-23.7427
Z038E0020	Z038	899	13.4067	4.40207	61.0044	33.3898	79.0235	6.43766	11.5988	1.80315	42.3831	53.4135	-24.8708
Z038E0021	Z038	900	12.3817	4.31453	57.4103	32.7133	79.0401	6.31524	11.4306	1.81267	39.8147	52.6659	-24.3956
Z038E0022	Z038	901	12.3117	4.31883	56.8722	32.0126	78.0211	5.98226	11.2913	1.88994	39.2616	51.8843	-23.9137
Z038E0023	Z038	902	11.6594	4.25489	54.716	31.9142	78.5568	6.19048	11.2291	1.81546	37.8217	51.8636	-23.882
Z038E0024	Z038	903	15.1417	5.03437	64.1019	33.8032	82.3061	7.06536	11.4811	1.62576	44.1955	56.5941	-25.2451
Z038E0025	Z038	904	12.5894	4.85695	51.7664	30.0651	81.6058	6.15499	10.2346	1.66435	34.7987	53.8461	-22.6834
Z038E0026	Z038	905	13.4467	4.33171	62.1078	32.3803	81.6616	6.80641	11.3042	1.66237	41.8166	55.2456	-25.5816
Z038E0027	Z038	906	12.3967	4.34683	48.0445	28.8025	82.2018	5.96995	9.9509	1.66599	31.9993	53.5009	-22.2374
Z038E0028	Z038	907	10.9694	4.00656	54.6514	30.9551	81.4763	6.27999	10.4937	1.67237	36.0825	53.3975	-24.692
Z038E0029	Z038	908	13.0317	4.41577	59.0207	31.948	81.9654	6.74037	10.9814	1.62969	39.7384	55.0055	-24.964
Z038E0030	Z038	909	11.3167	4.50478	50.4126	29.6558	82.0393	6.14605	10.1006	1.64557	33.2642	53.4899	-23.1324
Z038E0031	Z038	910	13.8567	4.24877	65.3291	33.9267	80.7099	6.86102	11.7072	1.70696	44.6692	55.1138	-26.2679
Z038E0032	Z038	911	14.5094	4.69452	61.8154	32.5251	82.9362	6.87683	10.9524	1.59342	41.776	56.4242	-25.1125
Z038E0033	Z038	912	11.1617	4.26333	52.2698	29.3132	85.7591	6.49776	9.5848	1.47678	32.9574	55.9116	-24.474
Z038E0034	Z038	913	14.6467	4.71663	62.278	32.9475	81.5179	6.76755	11.1935	1.6541	42.6456	55.6396	-24.9296
Z038E0035	Z038	914	13.6094	4.37264	62.2726	33.3636	80.9935	6.62473	11.3832	1.71933	42.5809	54.8234	-25.4869
Z038E0036	Z038	915	11.4417	4.34893	52.4521	30.4897	81.9862	6.32142	10.3088	1.63347	34.8325	53.7267	-23.8179
Z038E0037	Z038	916	12.0017	4.11914	58.3227	32.8374	80.8555	6.4986	11.0527	1.70128	39.6202	53.7789	-25.2617
Z038E0038	Z038	917	12.3194	4.70923	52.2148	30.1406	81.7344	6.01716	10.0631	1.6741	34.7905	53.8057	-22.9731
Z038E0039	Z038	918	13.4367	4.5924	58.5743	32.354	80.3331	6.45682	11.1555	1.72825	40.2601	54.033	-24.2699
Z038E0040	Z038	919	13.5267	4.52262	59.848	32.8128	80.1416	6.50208	11.3058	1.73996	41.2452	54.0656	-24.6145
Z038E0041	Z038	920	12.7267	4.46116	57.0896	32.1033	80.3107	6.3813	11.1014	1.74452	39.1014	53.578	-24.2394
Z038E0042	Z038	921	10.3194	3.98124	51.668	29.7653	82.2638	6.33382	10.2729	1.62324	33.56	53.3852	-24.289
Z038E0043	Z038	922	12.4867	4.55589	54.7607	30.013	85.8341	6.96998	10.0886	1.45268	35.3722	56.8365	-24.5856
Z038E0044	Z038	923	12.4367	4.33388	57.4658	31.687	81.6435	6.54342	10.8764	1.66364	38.6001	54.3737	-24.745
Z038E0045	Z038	924	12.1594	4.0847	59.4817	33.5868	79.7876	6.46775	11.433	1.7689	41.001	53.2524	-25.3984
Z038E0046	Z038	925	12.4394	4.09502	60.7321	33.8459	77.005	6.20003	11.9658	1.9315	42.6179	51.6963	-25.0371
Z038E0047	Z038	926	11.874	4.14608	57.4273	31.983	79.7373	6.26765	11.0779	1.76608	38.922	52.9212	-24.7079
Z038E0048	Z038	927	13.5294	4.51794	59.8786	30.9975	86.6747	7.19353	10.2989	1.43214	38.6837	58.2234	-25.7024
Z038E0049	Z038	928	12.844	4.62093	55.6505	31.9283	80.287	6.33794	10.9402	1.72523	38.3025	53.5	-23.7185
Z038E0050	Z038	929	12.8767	4.34976	59.2461	33.0551	79.9716	6.38041	11.2377	1.76468	40.7816	53.6085	-24.8108
Z038E0051	Z038	930	12.2167	4.00732	58.8047	32.542	79.5733	6.41834	11.3345	1.76722	40.1714	53.0651	-25.1007
Z038E0052	Z038	931	14.2117	4.62779	61.2791	33.0717	79.0553	6.48216	11.65	1.81331	42.7272	53.7681	-24.4448
Z038E0053	Z038	932	12.0117	4.12763	58.2132	32.6473	78.1323	6.20974	11.5287	1.85601	40.217	52.0304	-24.6474
Z038E0054	Z038	933	6.7894	2.51981	53.5953	31.807	76.9857	5.79358	11.0846	1.9153	35.3412	48.7991	-26.3048
Z038E0055	Z038	934	11.0594	4.27644	51.5967	29.8364	81.3957	6.11144	10.4021	1.70368	34.074	53.0423	-23.5667
Z038E0056	Z038	935	12.4267	4.25671	58.2053	31.1436	87.7471	7.2866	9.9832	1.37226	37.1439	58.3368	-26.1642
Z038E0057	Z038	936	12.3017	4.31412	57.143	32.0747	82.9591	6.68554	10.6427	1.59388	38.2241	55.1277	-25.0592
Z038E0058	Z038	937	11.1167	3.8139	56.4964	31.5489	80.9313	6.58023	10.8473	1.64855	37.6459	53.3897	-25.2883
Z038E0059	Z038	938	12.2794	4.096	59.9261	33.1194	78.639	6.42716	11.7079	1.82289	41.3976	52.6444	-25.1745
Z038E0060	Z038	939	11.5817	4.30678	53.8089	31.4575	80.1341	6.1038	10.6875	1.75098	36.5275	52.6837	-23.8406
Z038E0061	Z038	940	14.0067	4.50883	62.2612	32.7824	82.4921	6.95883	11.2118	1.61189	42.1376	56.0223	-25.5236
Z038E0062	Z038	941	11.5917	3.94978	58.6346	32.5936	78.5961	6.22982	11.4368	1.83557	40.0744	52.1911	-25.103
Z038E0063	Z038	942	13.9094	.	.	.	.	.	.	.	.	.	.
Z038E0064	Z038	943	13.6417	4.62251	59.0592	32.4432	84.2336	6.85128	10.4153	1.52163	39.5333	56.6468	-25.0734
Z038E0065	Z038	944	10.5317	4.29041	48.915	28.9461	85.5852	6.39934	9.3896	1.46951	30.8482	55.2571	-23.8392
Z038E0066	Z038	945	11.5917	4.19547	55.454	32.3155	76.3802	5.8815	11.4359	1.94767	38.8262	50.5026	-23.6883
Z038E0067	Z038	946	9.5967	4.0064	47.9884	29.2352	80.4108	5.86951	10.1407	1.72859	31.4805	51.5372	-23.1846
Z038E0068	Z038	947	12.6694	4.15458	60.9499	31.9798	87.0019	7.32497	10.2831	1.40419	39.2576	58.2348	-26.7535
Z038E0069	Z038	948	12.6494	4.60726	54.8289	30.658	81.1058	6.2862	10.6701	1.69878	36.9005	53.8369	-23.5654
Z038E0070	Z038	949	12.0917	4.53538	53.4134	31.0048	80.0411	6.02763	10.6996	1.77587	36.3483	52.7562	-23.2914
Z038E0071	Z038	950	10.9417	4.12055	53.064	30.2208	81.3234	6.29111	10.5358	1.67675	35.0204	53.1646	-24.1502
Z038E0072	Z038	951	13.2394	.	.	.	.	.	.	.	.	.	.
Z038E0073	Z038	952	11.694	3.96191	59.2262	32.0395	81.2229	6.56578	11.0774	1.68686	39.4785	53.9929	-25.6651
Z038E0074	Z038	953	10.2017	3.76827	53.6821	30.5503	80.9228	6.2517	10.2413	1.63839	35.0798	52.7615	-24.7804
Z038E0075	Z038	954	13.2667	4.36025	60.9074	32.528	82.9496	6.89321	10.996	1.59621	40.8481	55.8736	-25.6277
Z038E0076	Z038	955	13.3767	4.93529	58.6402	32.5136	81.2734	6.59643	11.1323	1.68738	40.1927	54.7134	-24.2539
Z038E0077	Z038	956	13.8094	4.48976	61.5048	33.3719	80.2663	6.62878	11.5106	1.73749	42.5204	54.4098	-25.041
Z038E0078	Z038	957	12.5517	4.34392	57.7556	31.6322	82.4692	6.64542	10.6259	1.60036	38.4847	55.0076	-24.9218
Z038E0079	Z038	958	11.694	4.73203	49.4498	30.0552	82.0259	6.04019	9.9924	1.6537	33.0933	53.5033	-22.6272
Z038E0080	Z038	959	12.6167	4.18549	60.3538	33.548	80.1866	6.56937	11.4149	1.7392	41.5169	53.7919	-25.4418
Z038E0081	Z038	960	12.3494	.	.	.	.	.	.	.	.	.	.
Z038E0082	Z038	961	11.9667	4.47565	53.4667	31.0619	81.3938	6.24395	10.4604	1.67704	35.9942	53.6215	-23.7031
