# Supplementary material for: Genetic Analysis of Kernel Traits in Maize-Teosinte Introgression Populations
Source: G3 (Bethesda). 2016 Jun 9;6(8):2523–30. doi: 10.1534/g3.116.030155 (PMC4978905; doi:10.1534/g3.116.030155)
Supplement: Supplemental Material [file supp_g3.116.030155_TableS3.xlsx]

## Sheet: Table S3
Table S3. Table for all QTLs (xlsx).
Traits	Chromosome	Closet SNP	Support interval (cM)	LOD	R2	p-value
Wt50k	1	t22	43.2-51.7	17.1	0.0631998	1.07495e-11
Wt50k	1	t91	157.6-164.6	8.42	0.0288505	0.000262271
Wt50k	3	t251	90-92.6	13.72	0.0581299	3.46367e-10
Wt50k	5	t412	65.0-74.8	18.51	0.0667942	1.88221e-12
Wt50k	8	t582	54.8-64.2	17.98	0.0697608	1.4002e-13
FFD	1	t22	43.2-51.7	17.28	0.0707993	9.19593e-12
FFD	2	t154	67.9-72.1	9.95	0.0429819	3.37946e-06
FFD	2	t186	120.5-127.3	10.8	0.0506394	5.64342e-08
FFD	8	t582	54.8-64.2	8.04	0.0342773	2.47446e-05
Area	1	t14	29.7-34.3	13.5	0.0376441	1.63228e-10
Area	1	t42	69.1-73.3	12.79	0.0318885	2.72233e-08
Area	1	t88	151.8-157.7	36.15	0.0793464	3.27912e-22
Area	2	t147	58.8-64.2	10.09	0.0250074	7.37325e-06
Area	2	t190	129.8-136.3	20.1	0.0412708	1.01084e-10
Area	3	t240	68.9-77.4	26.24	0.068363	6.24119e-19
Area	4	t301	49.4-57.7	11.65	0.0334361	9.16606e-09
Area	4	t332	89.1-97.9	13.39	0.0320273	2.46953e-08
Area	5	t412	65.0-74.8	25.55	0.0599194	6.63142e-17
Area	6	t492	50.7-59.5	11.97	0.0258162	7.70295e-07
Area	7	t528	61.4-64.9	12.56	0.0436922	6.44178e-12
Area	7	t540	72.1-81.2	9.92	0.021671	3.17229e-05
Area	8	t581	52.7-62.3	15.99	0.0380523	1.2168e-10
Perimeter	1	t13	29.7-34.3	19.28	0.0384416	1.25528e-11
Perimeter	1	t47	81.4-87.3	12.31	0.0378246	1.67542e-10
Perimeter	1	t88	151.8-157.7	37.96	0.0745317	2.33238e-22
Perimeter	2	t163	76.3-85.5	11.35	0.0368842	3.38452e-10
Perimeter	2	t189	125.9-134.3	13.49	0.0248611	1.6067e-07
Perimeter	3	t210	25.7-29.7	11.84	0.029321	3.73987e-08
Perimeter	3	t242	72.9-80.8	24.41	0.0668829	6.40373e-20
Perimeter	4	t319	57.4-63.9	11.43	0.0345319	7.30074e-10
Perimeter	4	t332	89.1-97.9	18.22	0.0479357	2.76761e-14
Perimeter	5	t412	65.0-74.8	25.83	0.057733	1.68644e-17
Perimeter	5	t445	106.4-110.9	11.52	0.0262082	9.13892e-07
Perimeter	6	t477	41.5-46.3	10.96	0.0241369	4.10239e-06
Perimeter	7	t531	64.9-73.4	19.53	0.0403137	2.59868e-11
Perimeter	8	t581	52.7-62.3	17.04	0.0345277	2.56751e-10
Roundness	1	t95p	164.6-169.2	11.76	0.0375127	2.73194e-06
Roundness	2	t123	5.7-11.5	10.83	0.0415869	3.85414e-07
Roundness	2	t135	36.2-40.6	19.85	0.112876	2.04466e-22
Roundness	2	t165	76.3-85.5	12.15	0.0420357	3.10169e-07
Roundness	4	t290	12.2-25.9	9.15	0.0313783	2.30128e-05
Roundness	5	t437	98.2-107	14..09	0.0511651	3.58066e-09
Width	1	t6	9.7-13.4	10.04	0.0423194	1.99769e-06
Width	1	t91	157.6-164.6	10.18	0.045423	5.19815e-07
Width	2	t146	56.9-63.0	17.82	0.0766631	4.78424e-13
Width	3	t234	60.5-68.9	10.74	0.0425797	1.78519e-06
Width	6	t492	55.7-59.5	6.83	0.027353	0.000262135
Length	1	t10	17.4-24.4	16.26	0.0360343	1.18754e-08
Length	1	t42	69.1-73.3	9.63	0.0307606	3.52746e-07
Length	1	t88	151.8-157.7	33.75	0.082009	5.141e-21
Length	2	t162	74.8-84.2	14.54	0.0429965	3.57231e-10
Length	2	t195	135.1-142.7	16.93	0.0369555	1.69003e-08
Length	3	t236	63.9-70.6	18.61	0.0587262	4.58143e-15
Length	4	t332	89.1-97.9	19.67	0.0560876	2.54964e-14
Length	5	t410	64.0-72.5	26.61	0.0702974	2.55447e-18
Length	5	t445	106.4-110.9	9.81	0.0251961	2.59525e-05
Length	7	t531	64.9-73.4	9.68	0.0237058	6.38323e-05
Length	8	t581	52.7-62.3	12.17	0.031901	6.61005e-08
L/W	1	t95	164.6-169.2	10.59	0.0353584	2.5359e-05
L/W	2	t124	5.7-11.5	11.53	0.0406639	2.46821e-06
L/W	2	t139	49.8-53.4	21.07	0.10406	5.96707e-19
L/W	4	t290	19.4-31.6	7.9	0.0295706	0.000149
L/W	5	t437	98.2-107	12.34	0.0487152	6.67151e-08
PC1	1	t14	29.7-34.3	19.11	0.0397548	1.73773e-12
PC1	1	t42	69.1-73.3	16.44	0.03443	3.4634e-10
PC1	1	t88	151.8-157.7	34.27	0.075528	2.02907e-23
PC1	1	t103	177.5-188.2	8.31	0.0194402	3.54497e-05
PC1	2	t190	129.8-136.3	22.9	0.0354322	4.3478e-10
PC1	3	t232	58.9-67.2	25.62	0.0601745	2.27175e-18
PC1	3	t267	103.2-11.2	10.83	0.0253559	5.85876e-08
PC1	4	t301	49.4-57.7	13.71	0.0288158	2.7583e-08
PC1	4	t332	89.1-97.9	14.93	0.0375109	3.10296e-11
PC1	5	t412	65-74.8	36.29	0.0766197	2.34475e-24
PC1	5	t445	106.4-110.9	9.22	0.0239518	2.7135e-06
PC1	6	t492	48-59.5	11.47	0.0212495	3.91724e-06
PC1	7	t528	61.4-64.9	11.62	0.0455169	5.85833e-14
PC1	7	t537	71.5-77	9.54	0.0173908	0.000160865
PC1	8	t581	52.7-62.3	23.14	0.0496317	6.94283e-16
PC2	1	t6	9.7-13.4	9.06	0.040439	9.62476e-06
PC2	2	t139	49.8-53.4	17.96	0.0968291	3.70962e-16
PC2	2	t159	72.1-81.2	11.1	0.0481082	4.05726e-07
PC3	1	t91	157.6-164.6	22.65	0.0972699	1.73301e-18
PC3	2	t147	58.8-64.2	8.6	0.0438034	2.47484e-07
PC3	2	t186	120.5-127.3	11.47	0.0452089	5.13799e-08
PC3	3	t240	68.9-77.4	14.69	0.0536304	2.32494e-09
PC3	4	t306	52.1-58.9	10.5908	0.039826	6.78433e-07
