# Supplementary material for: Genetic Analysis of Kernel Traits in Maize-Teosinte Introgression Populations
Source: G3 (Bethesda). 2016 Jun 9;6(8):2523–30. doi: 10.1534/g3.116.030155 (PMC4978905; doi:10.1534/g3.116.030155)
Supplement: Supplemental Material [file supp_g3.116.030155_TableS4.xlsx]

## Sheet: Table S4
Table S4. Allele effects for all QTLs(xlsx).
Trait	Chrom.	bp(B73 RefGen_v2)	cM	Additive effect estimate	Parameter	StdError	t-value	p-value
Wt50k	1	28421841	47.3	-2.69069	t22*Pop Z029	0.74636	-3.60509	0.000331251
Wt50k	1	28421841	47.3	0	t22*Pop Z030	-	-	-
Wt50k	1	28421841	47.3	-1.05297	t22*Pop Z031	0.517121	-2.03622	0.0420547
Wt50k	1	28421841	47.3	-0.574484	t22*Pop Z032	0.347691	-1.65228	0.0988671
Wt50k	1	28421841	47.3	-1.39326	t22*Pop Z033	0.471663	-2.95394	0.00322883
Wt50k	1	28421841	47.3	-0.939952	t22*Pop Z034	0.529158	-1.77632	0.0760582
Wt50k	1	28421841	47.3	-1.51307	t22*Pop Z035	0.37769	-4.00611	6.74466e-05
Wt50k	1	28421841	47.3	-0.853845	t22*Pop Z036	0.390873	-2.18446	0.0292164
Wt50k	1	28421841	47.3	1.00389	t22*Pop Z037	2.76525	0.363039	0.716671
Wt50k	1	28421841	47.3	-2.22565	t22*Pop Z038	0.449764	-4.94849	9.11022e-07
Wt50k	1	269324476	162.2	-1.09065	t91*Pop Z029	0.37318	-2.92257	0.00356873
Wt50k	1	269324476	162.2	-0.0763201	t91*Pop Z030	0.535502	-0.142521	0.886704
Wt50k	1	269324476	162.2	-0.532803	t91*Pop Z031	0.259374	-2.05419	0.0402798
Wt50k	1	269324476	162.2	-0.812429	t91*Pop Z032	0.299455	-2.71303	0.00680956
Wt50k	1	269324476	162.2	-1.55853	t91*Pop Z033	1.03776	-1.50182	0.133535
Wt50k	1	269324476	162.2	1.5681	t91*Pop Z034	1.38422	1.13284	0.257618
Wt50k	1	269324476	162.2	-0.801457	t91*Pop Z035	0.405773	-1.97514	0.0485938
Wt50k	1	269324476	162.2	-0.708627	t91*Pop Z036	0.398231	-1.77944	0.0755452
Wt50k	1	269324476	162.2	-0.795839	t91*Pop Z037	0.46686	-1.70466	0.088643
Wt50k	1	269324476	162.2	-0.653995	t91*Pop Z038	0.350756	-1.86453	0.0626112
Wt50k	3	179995065	90	-0.520095	t251*Pop Z029	0.383999	-1.35442	0.175983
Wt50k	3	179995065	90	0.469413	t251*Pop Z030	0.469062	1.00075	0.317249
Wt50k	3	179995065	90	-0.195377	t251*Pop Z031	0.170163	-1.14818	0.251237
Wt50k	3	179995065	90	-0.59655	t251*Pop Z032	0.29863	-1.99763	0.0460933
Wt50k	3	179995065	90	-1.56991	t251*Pop Z033	0.320463	-4.89888	1.16534e-06
Wt50k	3	179995065	90	-1.03956	t251*Pop Z034	0.607027	-1.71255	0.0871812
Wt50k	3	179995065	90	-0.98747	t251*Pop Z035	0.435122	-2.26941	0.0235074
Wt50k	3	179995065	90	-1.17114	t251*Pop Z036	0.466211	-2.51203	0.0121985
Wt50k	3	179995065	90	0.993482	t251*Pop Z037	0.350406	2.83523	0.00469408
Wt50k	3	179995065	90	-1.35036	t251*Pop Z038	0.519417	-2.59975	0.00950008
Wt50k	5	98651459	70	2.64951	t412*Pop Z029	2.08604	1.27011	0.204411
Wt50k	5	98651459	70	0	t412*Pop Z030	-	-	-
Wt50k	5	98651459	70	-1.34289	t412*Pop Z031	0.289794	-4.63393	4.18368e-06
Wt50k	5	98651459	70	-1.38988	t412*Pop Z032	0.300158	-4.63051	4.25163e-06
Wt50k	5	98651459	70	-0.594097	t412*Pop Z033	0.428976	-1.38492	0.16646
Wt50k	5	98651459	70	-1.76078	t412*Pop Z034	0.586165	-3.0039	0.00274798
Wt50k	5	98651459	70	0.0389229	t412*Pop Z035	0.366591	0.106175	0.91547
Wt50k	5	98651459	70	-1.1907	t412*Pop Z036	0.466067	-2.55479	0.0108081
Wt50k	5	98651459	70	-1.23818	t412*Pop Z037	0.350406	-3.53357	0.000433361
Wt50k	5	98651459	70	-0.874442	t412*Pop Z038	0.285566	-3.06214	0.00227074
Wt50k	8	108054285	59.7	0	t582*Pop Z029	-	-	-
Wt50k	8	108054285	59.7	-1.44434	t582*Pop Z030	0.324282	-4.45395	9.62185e-06
Wt50k	8	108054285	59.7	-0.839225	t582*Pop Z031	0.517121	-1.62288	0.105007
Wt50k	8	108054285	59.7	-1.4707	t582*Pop Z032	0.338308	-4.34723	1.55537e-05
Wt50k	8	108054285	59.7	-0.879167	t582*Pop Z033	0.334158	-2.63099	0.00867648
Wt50k	8	108054285	59.7	-0.390954	t582*Pop Z034	0.320037	-1.22159	0.222221
Wt50k	8	108054285	59.7	0	t582*Pop Z035	-	-	-
Wt50k	8	108054285	59.7	-0.828939	t582*Pop Z036	0.379954	-2.18168	0.0294217
Wt50k	8	108054285	59.7	-2.00322	t582*Pop Z037	0.428821	-4.67146	3.50407e-06
Wt50k	8	108054285	59.7	-0.726582	t582*Pop Z038	0.327505	-2.21853	0.0267967
FFD	1	28421841	47.3	-0.290289	t22*Pop Z029	0.176242	-1.64711	0.0999224
FFD	1	28421841	47.3	0	t22*Pop Z030	-	-	-
FFD	1	28421841	47.3	-0.265712	t22*Pop Z031	0.122382	-2.17117	0.0302075
FFD	1	28421841	47.3	0.101302	t22*Pop Z032	0.0781223	1.29671	0.195099
FFD	1	28421841	47.3	-0.161762	t22*Pop Z033	0.111358	-1.45264	0.146711
FFD	1	28421841	47.3	-0.108774	t22*Pop Z034	0.131386	-0.827899	0.407971
FFD	1	28421841	47.3	-0.307222	t22*Pop Z035	0.0892262	-3.44318	0.000604345
FFD	1	28421841	47.3	-0.144305	t22*Pop Z036	0.0887718	-1.62557	0.104429
FFD	1	28421841	47.3	0.484516	t22*Pop Z037	0.514085	0.942483	0.346226
FFD	1	28421841	47.3	-0.777587	t22*Pop Z038	0.108119	-7.19197	1.45138e-12
FFD	2	51816033	72.1	0.0764065	t154*Pop Z029	0.0837625	0.91218	0.361945
FFD	2	51816033	72.1	0.0118681	t154*Pop Z030	0.0605248	0.196086	0.844592
FFD	2	51816033	72.1	0.120207	t154*Pop Z031	0.0662268	1.81508	0.0698811
FFD	2	51816033	72.1	0.114267	t154*Pop Z032	0.0887416	1.28764	0.198239
FFD	2	51816033	72.1	-0.020439	t154*Pop Z033	0.0804491	-0.254062	0.799512
FFD	2	51816033	72.1	0.00312673	t154*Pop Z034	0.0888164	0.0352044	0.971925
FFD	2	51816033	72.1	-0.0910117	t154*Pop Z035	0.074044	-1.22916	0.21937
FFD	2	51816033	72.1	0.262248	t154*Pop Z036	0.0841857	3.11511	0.0019034
FFD	2	51816033	72.1	0.342001	t154*Pop Z037	0.0827854	4.13117	3.98334e-05
FFD	2	51816033	72.1	0.221419	t154*Pop Z038	0.0686247	3.22652	0.00130327
FFD	2	215089816	123.9	0	t186*Pop Z029	-	-	-
FFD	2	215089816	123.9	-0.0591116	t186*Pop Z030	0.246324	-0.239975	0.81041
FFD	2	215089816	123.9	-0.0180234	t186*Pop Z031	0.05541	-0.325273	0.745059
FFD	2	215089816	123.9	-0.139409	t186*Pop Z032	0.149526	-0.932341	0.351437
FFD	2	215089816	123.9	0.212837	t186*Pop Z033	0.245634	0.86648	0.386483
FFD	2	215089816	123.9	-0.00720976	t186*Pop Z034	0.0868872	-0.0829784	0.933889
FFD	2	215089816	123.9	0.312354	t186*Pop Z035	0.245814	1.27069	0.204202
FFD	2	215089816	123.9	0.329911	t186*Pop Z036	0.101288	3.25715	0.00117208
FFD	2	215089816	123.9	0.284445	t186*Pop Z037	0.0486469	5.84713	7.24399e-09
FFD	2	215089816	123.9	-0.0594845	t186*Pop Z038	0.110609	-0.537788	0.590871
FFD	8	108054285	59.7	0	t582*Pop Z029	-	-	-
FFD	8	108054285	59.7	-0.192951	t582*Pop Z030	0.0766382	-2.51768	0.0120043
FFD	8	108054285	59.7	-0.138497	t582*Pop Z031	0.122382	-1.13168	0.258104
FFD	8	108054285	59.7	-0.183117	t582*Pop Z032	0.0795483	-2.30196	0.0215894
FFD	8	108054285	59.7	-0.0802136	t582*Pop Z033	0.0790782	-1.01436	0.310714
FFD	8	108054285	59.7	-0.0108946	t582*Pop Z034	0.072902	-0.149441	0.881243
FFD	8	108054285	59.7	0	t582*Pop Z035	-	-	-
FFD	8	108054285	59.7	-0.132316	t582*Pop Z036	0.0789168	-1.67665	0.0939952
FFD	8	108054285	59.7	-0.435264	t582*Pop Z037	0.101708	-4.27953	2.0963e-05
FFD	8	108054285	59.7	-0.066287	t582*Pop Z038	0.0776755	-0.853383	0.393698
Area	1	15775282	31.7	-11.7251	t14*Pop Z029	2.20338	-5.32144	1.37103e-07
Area	1	15775282	31.7	0	t14*Pop Z030	-	-	-
Area	1	15775282	31.7	-3.36024	t14*Pop Z031	1.36036	-2.47011	0.0137347
Area	1	15775282	31.7	-2.85853	t14*Pop Z032	0.851118	-3.35856	0.000824156
Area	1	15775282	31.7	-1.92015	t14*Pop Z033	1.27858	-1.50178	0.133586
Area	1	15775282	31.7	-2.60401	t14*Pop Z034	1.36152	-1.91258	0.0561926
Area	1	15775282	31.7	0.202034	t14*Pop Z035	1.26019	0.16032	0.872673
Area	1	15775282	31.7	-1.86267	t14*Pop Z036	1.03079	-1.80703	0.0711685
Area	1	15775282	31.7	0	t14*Pop Z037	-	-	-
Area	1	15775282	31.7	0.0294676	t14*Pop Z038	1.57789	0.0186753	0.985105
Area	1	60165124	72	-3.64064	t42*Pop Z029	1.24564	-2.9227	0.00357737
Area	1	60165124	72	0	t42*Pop Z030	-	-	-
Area	1	60165124	72	-1.25245	t42*Pop Z031	1.24664	-1.00465	0.315396
Area	1	60165124	72	-6.12043	t42*Pop Z032	2.21789	-2.75958	0.0059327
Area	1	60165124	72	-0.609191	t42*Pop Z033	1.82336	-0.334104	0.738397
Area	1	60165124	72	-2.00276	t42*Pop Z034	1.43096	-1.39959	0.16206
Area	1	60165124	72	-7.40038	t42*Pop Z035	1.67437	-4.41979	1.13799e-05
Area	1	60165124	72	-4.45699	t42*Pop Z036	1.31154	-3.39828	0.0007149
Area	1	60165124	72	1.49352	t42*Pop Z037	2.03087	0.735409	0.462327
Area	1	60165124	72	-1.94268	t42*Pop Z038	1.88396	-1.03117	0.302802
Area	1	259375688	155.6	-6.40605	t88*Pop Z029	1.16274	-5.50944	4.99297e-08
Area	1	259375688	155.6	-4.41513	t88*Pop Z030	1.58247	-2.79001	0.00540804
Area	1	259375688	155.6	-3.26317	t88*Pop Z031	0.654356	-4.98685	7.67495e-07
Area	1	259375688	155.6	-4.1073	t88*Pop Z032	0.753015	-5.45447	6.72955e-08
Area	1	259375688	155.6	0.00655554	t88*Pop Z033	1.52219	0.00430666	0.996565
Area	1	259375688	155.6	8.4342	t88*Pop Z034	8.77852	0.960777	0.336983
Area	1	259375688	155.6	-2.41654	t88*Pop Z035	1.06639	-2.26609	0.0237379
Area	1	259375688	155.6	-2.52591	t88*Pop Z036	0.998877	-2.52876	0.0116564
Area	1	259375688	155.6	-5.23849	t88*Pop Z037	1.02536	-5.10891	4.1405e-07
Area	1	259375688	155.6	-4.38352	t88*Pop Z038	0.873813	-5.01654	6.6129e-07
Area	2	30906065	62.2	-1.66138	t147*Pop Z029	0.968977	-1.71457	0.0868485
Area	2	30906065	62.2	2.84654	t147*Pop Z030	0.748017	3.80545	0.00015341
Area	2	30906065	62.2	1.773	t147*Pop Z031	1.29975	1.36411	0.172955
Area	2	30906065	62.2	2.696	t147*Pop Z032	0.826036	3.26378	0.00115059
Area	2	30906065	62.2	-3.30406	t147*Pop Z033	1.91839	-1.7223	0.0854379
Area	2	30906065	62.2	-0.453273	t147*Pop Z034	0.852074	-0.531965	0.594912
Area	2	30906065	62.2	2.15927	t147*Pop Z035	0.872621	2.47447	0.0135696
Area	2	30906065	62.2	0.81466	t147*Pop Z036	1.03765	0.785104	0.432648
Area	2	30906065	62.2	4.0382	t147*Pop Z037	4.77498	0.8457	0.397997
Area	2	30906065	62.2	0.107285	t147*Pop Z038	1.04582	0.102584	0.918321
Area	2	222601043	132.9	21.0914	t190*Pop Z029	10.5099	2.00682	0.0451373
Area	2	222601043	132.9	-1.97285	t190*Pop Z030	3.05484	-0.645811	0.518605
Area	2	222601043	132.9	-2.7662	t190*Pop Z031	0.609075	-4.54164	6.52866e-06
Area	2	222601043	132.9	-1.37787	t190*Pop Z032	1.18189	-1.16582	0.244068
Area	2	222601043	132.9	-6.50598	t190*Pop Z033	6.08875	-1.06852	0.285637
Area	2	222601043	132.9	-1.52057	t190*Pop Z034	0.990583	-1.53502	0.125211
Area	2	222601043	132.9	-0.176313	t190*Pop Z035	1.37493	-0.128235	0.897999
Area	2	222601043	132.9	-2.15309	t190*Pop Z036	1.26723	-1.69906	0.089734
Area	2	222601043	132.9	-4.00365	t190*Pop Z037	0.566158	-7.07161	3.59042e-12
Area	2	222601043	132.9	-1.36839	t190*Pop Z038	2.18483	-0.626313	0.531305
Area	3	161257992	72.9	0.00518374	t240*Pop Z029	1.38918	0.0037315	0.997024
Area	3	161257992	72.9	1.7721	t240*Pop Z030	3.19176	0.555211	0.57892
Area	3	161257992	72.9	-0.583763	t240*Pop Z031	0.638372	-0.914455	0.36078
Area	3	161257992	72.9	-1.43453	t240*Pop Z032	1.11763	-1.28355	0.199708
Area	3	161257992	72.9	-7.97763	t240*Pop Z033	0.891514	-8.94841	2.9425e-18
Area	3	161257992	72.9	-0.714074	t240*Pop Z034	1.33012	-0.536849	0.591535
Area	3	161257992	72.9	-2.76378	t240*Pop Z035	1.39772	-1.97736	0.0483772
Area	3	161257992	72.9	-4.67971	t240*Pop Z036	1.22528	-3.81929	0.000145214
Area	3	161257992	72.9	-5.82856	t240*Pop Z037	2.84915	-2.04572	0.0411416
Area	3	161257992	72.9	-2.64943	t240*Pop Z038	1.22627	-2.16055	0.0310545
Area	4	35217409	52.8	-6.88599	t301*Pop Z029	3.06705	-2.24516	0.0250567
Area	4	35217409	52.8	-4.50813	t301*Pop Z030	1.52742	-2.95146	0.00326408
Area	4	35217409	52.8	-2.06096	t301*Pop Z031	0.846653	-2.43424	0.0151618
Area	4	35217409	52.8	-1.79965	t301*Pop Z032	0.950606	-1.89316	0.0587323
Area	4	35217409	52.8	-5.16389	t301*Pop Z033	1.78859	-2.88714	0.00400256
Area	4	35217409	52.8	2.40768	t301*Pop Z034	2.37794	1.01251	0.31163
Area	4	35217409	52.8	0	t301*Pop Z035	-	-	-
Area	4	35217409	52.8	-1.5162	t301*Pop Z036	0.864403	-1.75405	0.0798421
Area	4	35217409	52.8	-7.89017	t301*Pop Z037	2.36224	-3.34012	0.000880002
Area	4	35217409	52.8	-1.2726	t301*Pop Z038	2.28684	-0.556489	0.578047
Area	4	181229893	93.2	0	t332*Pop Z029	-	-	-
Area	4	181229893	93.2	-4.27	t332*Pop Z030	1.27814	-3.34078	0.000877937
Area	4	181229893	93.2	-0.653312	t332*Pop Z031	1.03324	-0.632291	0.527395
Area	4	181229893	93.2	-2.8706	t332*Pop Z032	0.987184	-2.90787	0.00374939
Area	4	181229893	93.2	-2.76387	t332*Pop Z033	1.31026	-2.1094	0.0352499
Area	4	181229893	93.2	-1.3875	t332*Pop Z034	1.25848	-1.10252	0.2706
Area	4	181229893	93.2	-2.6386	t332*Pop Z035	1.55769	-1.69392	0.0907079
Area	4	181229893	93.2	-2.06643	t332*Pop Z036	0.913046	-2.26323	0.0239143
Area	4	181229893	93.2	-1.65402	t332*Pop Z037	0.998106	-1.65715	0.0979182
Area	4	181229893	93.2	-5.05705	t332*Pop Z038	1.19144	-4.24451	2.47332e-05
Area	5	89318174	69.5	7.48961	t412*Pop Z029	6.13409	1.22098	0.222487
Area	5	89318174	69.5	0	t412*Pop Z030	-	-	-
Area	5	89318174	69.5	-5.02572	t412*Pop Z031	0.85843	-5.85455	7.22772e-09
Area	5	89318174	69.5	-3.40753	t412*Pop Z032	0.967686	-3.52132	0.00045609
Area	5	89318174	69.5	-1.06419	t412*Pop Z033	1.28555	-0.827812	0.408047
Area	5	89318174	69.5	-6.63225	t412*Pop Z034	1.72471	-3.84542	0.000130851
Area	5	89318174	69.5	-1.83231	t412*Pop Z035	1.08744	-1.68498	0.09242
Area	5	89318174	69.5	-4.87275	t412*Pop Z036	1.38739	-3.51218	0.000471787
Area	5	89318174	69.5	-4.92357	t412*Pop Z037	1.04818	-4.69725	3.15082e-06
Area	5	89318174	69.5	-2.1912	t412*Pop Z038	0.858233	-2.55315	0.0108776
Area	6	142454079	55.7	0	t492*Pop Z029	-	-	-
Area	6	142454079	55.7	-7.26385	t492*Pop Z030	3.05484	-2.37782	0.0176721
Area	6	142454079	55.7	-3.83993	t492*Pop Z031	0.911867	-4.21106	2.85938e-05
Area	6	142454079	55.7	-4.08264	t492*Pop Z032	1.65178	-2.47166	0.0136757
Area	6	142454079	55.7	1.66231	t492*Pop Z033	2.07016	0.802988	0.422243
Area	6	142454079	55.7	-0.457032	t492*Pop Z034	4.50442	-0.101463	0.919211
Area	6	142454079	55.7	-2.5769	t492*Pop Z035	1.79469	-1.43585	0.151474
Area	6	142454079	55.7	-8.57332	t492*Pop Z036	3.0445	-2.816	0.00499372
Area	6	142454079	55.7	0	t492*Pop Z037	-	-	-
Area	6	142454079	55.7	-3.15534	t492*Pop Z038	1.09241	-2.88842	0.00398649
Area	7	129350989	63.7	-5.52495	t528*Pop Z029	1.40042	-3.94522	8.74215e-05
Area	7	129350989	63.7	0	t528*Pop Z030	-	-	-
Area	7	129350989	63.7	-4.3307	t528*Pop Z031	1.27848	-3.38738	0.00074346
Area	7	129350989	63.7	-7.08816	t528*Pop Z032	2.12611	-3.33386	0.000899735
Area	7	129350989	63.7	-3.77421	t528*Pop Z033	1.37111	-2.75266	0.00605814
Area	7	129350989	63.7	-4.40454	t528*Pop Z034	3.04193	-1.44794	0.148062
Area	7	129350989	63.7	-1.29189	t528*Pop Z035	0.934115	-1.38301	0.167084
Area	7	129350989	63.7	-0.453997	t528*Pop Z036	0.732338	-0.619928	0.535499
Area	7	129350989	63.7	0.202739	t528*Pop Z037	1.43893	0.140896	0.887991
Area	7	129350989	63.7	-2.47471	t528*Pop Z038	1.45174	-1.70465	0.0886852
Area	7	144129934	77	3.29346	t540*Pop Z029	1.61515	2.03911	0.0417991
Area	7	144129934	77	-2.65988	t540*Pop Z030	1.52742	-1.74142	0.0820319
Area	7	144129934	77	3.99024	t540*Pop Z031	1.38434	2.88241	0.0040624
Area	7	144129934	77	0.152279	t540*Pop Z032	1.27433	0.119497	0.904915
Area	7	144129934	77	1.13989	t540*Pop Z033	2.56088	0.445117	0.656367
Area	7	144129934	77	0	t540*Pop Z034	-	-	-
Area	7	144129934	77	-1.66188	t540*Pop Z035	0.909478	-1.82729	0.0680644
Area	7	144129934	77	-1.66212	t540*Pop Z036	1.18129	-1.40703	0.159843
Area	7	144129934	77	-4.7498	t540*Pop Z037	1.59774	-2.97282	0.00304789
Area	7	144129934	77	-2.77741	t540*Pop Z038	0.873285	-3.18042	0.00153279
Area	8	101775361	57.7	0	t581*Pop Z029	-	-	-
Area	8	101775361	57.7	-5.9583	t581*Pop Z030	1.09483	-5.44219	7.19097e-08
Area	8	101775361	57.7	-2.09917	t581*Pop Z031	1.0837	-1.93704	0.0531258
Area	8	101775361	57.7	-0.829004	t581*Pop Z032	1.14897	-0.721518	0.470822
Area	8	101775361	57.7	-2.66807	t581*Pop Z033	1.07449	-2.48312	0.0132474
Area	8	101775361	57.7	-2.12441	t581*Pop Z034	1.68846	-1.25819	0.208725
Area	8	101775361	57.7	0	t581*Pop Z035	-	-	-
Area	8	101775361	57.7	-2.26481	t581*Pop Z036	1.21834	-1.85893	0.0634391
Area	8	101775361	57.7	-5.46193	t581*Pop Z037	1.42547	-3.83167	0.000138233
Area	8	101775361	57.7	-2.34772	t581*Pop Z038	0.982817	-2.38877	0.017158
Perimeter	1	14959203	29.9	-2.56947	t13*Pop Z029	0.396466	-6.48094	1.69216e-10
Perimeter	1	14959203	29.9	0	t13*Pop Z030	-	-	-
Perimeter	1	14959203	29.9	-0.846417	t13*Pop Z031	0.434758	-1.94687	0.0519394
Perimeter	1	14959203	29.9	-0.96544	t13*Pop Z032	0.259526	-3.72001	0.00021474
Perimeter	1	14959203	29.9	-1.18238	t13*Pop Z033	0.367279	-3.2193	0.0013428
Perimeter	1	14959203	29.9	-0.727317	t13*Pop Z034	0.423646	-1.7168	0.086446
Perimeter	1	14959203	29.9	0.099603	t13*Pop Z035	0.381011	0.261417	0.793846
Perimeter	1	14959203	29.9	-0.674771	t13*Pop Z036	0.318895	-2.11596	0.0346909
Perimeter	1	14959203	29.9	0	t13*Pop Z037	-	-	-
Perimeter	1	14959203	29.9	-0.732653	t13*Pop Z038	0.733504	-0.998839	0.318209
Perimeter	1	83780725	82.4	-1.17681	t47*Pop Z029	0.946132	-1.24381	0.213974
Perimeter	1	83780725	82.4	0.319045	t47*Pop Z030	0.918954	0.347183	0.728555
Perimeter	1	83780725	82.4	-0.279286	t47*Pop Z031	0.384763	-0.725864	0.468158
Perimeter	1	83780725	82.4	-2.36298	t47*Pop Z032	0.698306	-3.38387	0.000753475
Perimeter	1	83780725	82.4	-0.382579	t47*Pop Z033	0.566221	-0.675671	0.499467
Perimeter	1	83780725	82.4	-0.318373	t47*Pop Z034	0.437504	-0.727703	0.467033
Perimeter	1	83780725	82.4	-1.9243	t47*Pop Z035	0.442633	-4.34739	1.57648e-05
Perimeter	1	83780725	82.4	-0.966703	t47*Pop Z036	0.293061	-3.29864	0.0010194
Perimeter	1	83780725	82.4	-0.269577	t47*Pop Z037	0.544452	-0.495133	0.620657
Perimeter	1	83780725	82.4	-1.3329	t47*Pop Z038	0.627658	-2.12361	0.0340434
Perimeter	1	259375688	155.6	-1.91052	t88*Pop Z029	0.325095	-5.8768	6.39851e-09
Perimeter	1	259375688	155.6	-1.7814	t88*Pop Z030	0.492869	-3.61435	0.000322102
Perimeter	1	259375688	155.6	-1.00734	t88*Pop Z031	0.20203	-4.98608	7.73029e-07
Perimeter	1	259375688	155.6	-1.18684	t88*Pop Z032	0.231639	-5.12366	3.854e-07
Perimeter	1	259375688	155.6	0.532407	t88*Pop Z033	0.475688	1.11924	0.263414
Perimeter	1	259375688	155.6	1.52467	t88*Pop Z034	1.29796	1.17466	0.240518
Perimeter	1	259375688	155.6	-1.24294	t88*Pop Z035	0.345802	-3.59437	0.000347382
Perimeter	1	259375688	155.6	-0.801027	t88*Pop Z036	0.30541	-2.62279	0.00890595
Perimeter	1	259375688	155.6	-1.57325	t88*Pop Z037	0.289355	-5.43709	7.42573e-08
Perimeter	1	259375688	155.6	-0.963281	t88*Pop Z038	0.278367	-3.46047	0.000571075
Perimeter	2	151638671	80.6	-1.32199	t163*Pop Z029	0.287473	-4.59867	5.02367e-06
Perimeter	2	151638671	80.6	0.172889	t163*Pop Z030	0.331813	0.521044	0.602497
Perimeter	2	151638671	80.6	-1.11124	t163*Pop Z031	0.419798	-2.64709	0.00829657
Perimeter	2	151638671	80.6	0.437551	t163*Pop Z032	0.333616	1.31154	0.190094
Perimeter	2	151638671	80.6	-0.277678	t163*Pop Z033	0.277027	-1.00235	0.316513
Perimeter	2	151638671	80.6	-0.366215	t163*Pop Z034	0.354655	-1.0326	0.302141
Perimeter	2	151638671	80.6	0.345572	t163*Pop Z035	0.390687	0.884525	0.376709
Perimeter	2	151638671	80.6	0.665929	t163*Pop Z036	0.306386	2.1735	0.0300683
Perimeter	2	151638671	80.6	-0.890177	t163*Pop Z037	0.326306	-2.72804	0.00652666
Perimeter	2	151638671	80.6	0.0918844	t163*Pop Z038	0.371958	0.247029	0.804956
Perimeter	2	219860208	129.8	0	t189*Pop Z029	-	-	-
Perimeter	2	219860208	129.8	-1.12321	t189*Pop Z030	0.984662	-1.14071	0.254371
Perimeter	2	219860208	129.8	-0.903949	t189*Pop Z031	0.185059	-4.88467	1.27781e-06
Perimeter	2	219860208	129.8	0	t189*Pop Z032	-	-	-
Perimeter	2	219860208	129.8	0	t189*Pop Z033	-	-	-
Perimeter	2	219860208	129.8	-0.426979	t189*Pop Z034	0.303299	-1.40778	0.159628
Perimeter	2	219860208	129.8	-0.176172	t189*Pop Z035	0.673239	-0.261677	0.793645
Perimeter	2	219860208	129.8	-0.919551	t189*Pop Z036	0.400488	-2.29608	0.0219584
Perimeter	2	219860208	129.8	-0.843798	t189*Pop Z037	0.190929	-4.41943	1.14228e-05
Perimeter	2	219860208	129.8	-0.717519	t189*Pop Z038	0.504269	-1.42289	0.155202
Perimeter	3	8300032	29.7	0	t210*Pop Z029	-	-	-
Perimeter	3	8300032	29.7	-0.994184	t210*Pop Z030	0.296051	-3.35815	0.000826013
Perimeter	3	8300032	29.7	-0.486699	t210*Pop Z031	0.257298	-1.89157	0.0589494
Perimeter	3	8300032	29.7	-2.29855	t210*Pop Z032	1.00803	-2.28023	0.0228858
Perimeter	3	8300032	29.7	-1.01695	t210*Pop Z033	0.368003	-2.76342	0.00586622
Perimeter	3	8300032	29.7	-0.558188	t210*Pop Z034	0.489575	-1.14015	0.254605
Perimeter	3	8300032	29.7	-0.468119	t210*Pop Z035	0.256912	-1.8221	0.0688557
Perimeter	3	8300032	29.7	-0.765747	t210*Pop Z036	0.55352	-1.38341	0.166968
Perimeter	3	8300032	29.7	-0.6838	t210*Pop Z037	0.327952	-2.08506	0.0374159
Perimeter	3	8300032	29.7	-2.33942	t210*Pop Z038	0.795765	-2.93984	0.00338918
Perimeter	3	167371799	77	0.461731	t242*Pop Z029	0.436967	1.05667	0.291016
Perimeter	3	167371799	77	0.143688	t242*Pop Z030	0.531738	0.270224	0.787066
Perimeter	3	167371799	77	-0.154639	t242*Pop Z031	0.186024	-0.831286	0.406088
Perimeter	3	167371799	77	-0.20696	t242*Pop Z032	0.401277	-0.515754	0.606185
Perimeter	3	167371799	77	-2.07338	t242*Pop Z033	0.26772	-7.7446	3.26437e-14
Perimeter	3	167371799	77	0.0175219	t242*Pop Z034	0.403125	0.0434652	0.965343
Perimeter	3	167371799	77	-0.703693	t242*Pop Z035	0.443599	-1.58633	0.113105
Perimeter	3	167371799	77	-2.4779	t242*Pop Z036	0.414242	-5.98177	3.47885e-09
Perimeter	3	167371799	77	-0.437383	t242*Pop Z037	0.941134	-0.464741	0.642258
Perimeter	3	167371799	77	-0.153331	t242*Pop Z038	0.415007	-0.369467	0.711889
Perimeter	4	147915924	61.8	-2.10521	t319*Pop Z029	0.946132	-2.22507	0.026386
Perimeter	4	147915924	61.8	-1.28104	t319*Pop Z030	0.459477	-2.78805	0.00544276
Perimeter	4	147915924	61.8	-0.662229	t319*Pop Z031	0.272615	-2.42917	0.0153774
Perimeter	4	147915924	61.8	0.320888	t319*Pop Z032	0.38511	0.833237	0.404988
Perimeter	4	147915924	61.8	-1.43738	t319*Pop Z033	0.571586	-2.51471	0.0121301
Perimeter	4	147915924	61.8	-0.880197	t319*Pop Z034	0.394041	-2.23377	0.0258051
Perimeter	4	147915924	61.8	0	t319*Pop Z035	-	-	-
Perimeter	4	147915924	61.8	-0.640182	t319*Pop Z036	0.199811	-3.20393	0.00141548
Perimeter	4	147915924	61.8	-0.518249	t319*Pop Z037	0.377625	-1.37239	0.17037
Perimeter	4	147915924	61.8	-1.08491	t319*Pop Z038	0.65451	-1.65759	0.097836
Perimeter	4	178580488	89.1	0	t332*Pop Z029	-	-	-
Perimeter	4	178580488	89.1	-1.51991	t332*Pop Z030	0.394285	-3.85487	0.00012616
Perimeter	4	178580488	89.1	-0.490969	t332*Pop Z031	0.314319	-1.56201	0.118726
Perimeter	4	178580488	89.1	-1.86897	t332*Pop Z032	0.33322	-5.60881	2.90702e-08
Perimeter	4	178580488	89.1	-1.16691	t332*Pop Z033	0.412249	-2.8306	0.00477576
Perimeter	4	178580488	89.1	-0.362633	t332*Pop Z034	0.406075	-0.893021	0.372145
Perimeter	4	178580488	89.1	-1.04676	t332*Pop Z035	0.518791	-2.0177	0.0439936
Perimeter	4	178580488	89.1	-0.535223	t332*Pop Z036	0.279138	-1.91741	0.0555819
Perimeter	4	178580488	89.1	-0.853078	t332*Pop Z037	0.310217	-2.74994	0.00611048
Perimeter	4	178580488	89.1	-1.39855	t332*Pop Z038	0.432022	-3.23722	0.00126237
Perimeter	5	98651459	70	2.59318	t412*Pop Z029	1.89226	1.37041	0.170986
Perimeter	5	98651459	70	0	t412*Pop Z030	-	-	-
Perimeter	5	98651459	70	-1.70404	t412*Pop Z031	0.27825	-6.12412	1.50019e-09
Perimeter	5	98651459	70	-1.10656	t412*Pop Z032	0.276697	-3.99918	7.01346e-05
Perimeter	5	98651459	70	-0.155077	t412*Pop Z033	0.431926	-0.359036	0.719673
Perimeter	5	98651459	70	-1.75287	t412*Pop Z034	0.562144	-3.11818	0.00189227
Perimeter	5	98651459	70	-0.524643	t412*Pop Z035	0.343898	-1.52557	0.127556
Perimeter	5	98651459	70	-1.07491	t412*Pop Z036	0.450811	-2.38439	0.0173659
Perimeter	5	98651459	70	-1.69632	t412*Pop Z037	0.365544	-4.64053	4.12984e-06
Perimeter	5	98651459	70	-0.94111	t412*Pop Z038	0.268761	-3.50166	0.000490928
Perimeter	5	201667249	108.8	-0.871305	t445*Pop Z029	0.325095	-2.68016	0.00752726
Perimeter	5	201667249	108.8	-1.07952	t445*Pop Z030	0.395092	-2.73232	0.0064434
Perimeter	5	201667249	108.8	-1.31016	t445*Pop Z031	0.30481	-4.2983	1.95837e-05
Perimeter	5	201667249	108.8	-0.0759303	t445*Pop Z032	0.652182	-0.116425	0.907348
Perimeter	5	201667249	108.8	-0.458466	t445*Pop Z033	0.37404	-1.22571	0.220707
Perimeter	5	201667249	108.8	0.0909039	t445*Pop Z034	0.428935	0.211929	0.832222
Perimeter	5	201667249	108.8	4.59824	t445*Pop Z035	1.9758	2.32728	0.0202274
Perimeter	5	201667249	108.8	-0.578297	t445*Pop Z036	0.56692	-1.02007	0.30804
Perimeter	5	201667249	108.8	0.424981	t445*Pop Z037	0.32981	1.28856	0.197965
Perimeter	5	201667249	108.8	-0.98729	t445*Pop Z038	0.560651	-1.76097	0.0786681
Perimeter	6	114741030	41.5	0.024674	t477*Pop Z029	0.428528	0.0575786	0.9541
Perimeter	6	114741030	41.5	-1.27831	t477*Pop Z030	0.472419	-2.70589	0.00697362
Perimeter	6	114741030	41.5	-0.547224	t477*Pop Z031	0.299835	-1.82508	0.0684036
Perimeter	6	114741030	41.5	-1.39893	t477*Pop Z032	0.505439	-2.76775	0.00578962
Perimeter	6	114741030	41.5	-1.8237	t477*Pop Z033	0.73406	-2.4844	0.0132034
Perimeter	6	114741030	41.5	0.0312662	t477*Pop Z034	0.594303	0.0526098	0.958057
Perimeter	6	114741030	41.5	-0.586997	t477*Pop Z035	0.423833	-1.38497	0.166491
Perimeter	6	114741030	41.5	-2.8053	t477*Pop Z036	0.679685	-4.12736	4.09955e-05
Perimeter	6	114741030	41.5	0.147505	t477*Pop Z037	0.358047	0.411971	0.680483
Perimeter	6	114741030	41.5	-0.0697181	t477*Pop Z038	0.607759	-0.114713	0.908704
Perimeter	7	134099896	69.8	-0.827603	t531*Pop Z029	0.292839	-2.82614	0.00484208
Perimeter	7	134099896	69.8	-2.69902	t531*Pop Z030	0.944837	-2.8566	0.0044056
Perimeter	7	134099896	69.8	-0.313179	t531*Pop Z031	0.262721	-1.19206	0.233632
Perimeter	7	134099896	69.8	-0.595006	t531*Pop Z032	0.304501	-1.95404	0.0510838
Perimeter	7	134099896	69.8	-1.32088	t531*Pop Z033	0.435658	-3.03191	0.00251748
Perimeter	7	134099896	69.8	-1.15003	t531*Pop Z034	0.939011	-1.22473	0.221079
Perimeter	7	134099896	69.8	-0.449307	t531*Pop Z035	0.200559	-2.24027	0.0253778
Perimeter	7	134099896	69.8	0.0660597	t531*Pop Z036	0.231874	0.284895	0.775807
Perimeter	7	134099896	69.8	-1.3225	t531*Pop Z037	0.292378	-4.52326	7.12188e-06
Perimeter	7	134099896	69.8	-1.96289	t531*Pop Z038	0.41943	-4.67989	3.43026e-06
Perimeter	8	101775361	57.7	0	t581*Pop Z029	-	-	-
Perimeter	8	101775361	57.7	-1.71086	t581*Pop Z030	0.350672	-4.87879	1.31519e-06
Perimeter	8	101775361	57.7	-0.896117	t581*Pop Z031	0.334447	-2.6794	0.00754419
Perimeter	8	101775361	57.7	-0.736422	t581*Pop Z032	0.239701	-3.07225	0.0022047
Perimeter	8	101775361	57.7	-0.526263	t581*Pop Z033	0.324829	-1.62012	0.105645
Perimeter	8	101775361	57.7	-0.475698	t581*Pop Z034	0.357516	-1.33057	0.183754
Perimeter	8	101775361	57.7	0	t581*Pop Z035	-	-	-
Perimeter	8	101775361	57.7	-0.373212	t581*Pop Z036	0.384695	-0.970151	0.332298
Perimeter	8	101775361	57.7	-1.27701	t581*Pop Z037	0.426346	-2.99525	0.0028364
Perimeter	8	101775361	57.7	-0.909863	t581*Pop Z038	0.303192	-3.00095	0.00278453
Roundness	1	274684822	167.8	2.23738	t95*Pop Z029	0.422024	5.30154	1.49186e-07
Roundness	1	274684822	167.8	-1.14615	t95*Pop Z030	1.15622	-0.991292	0.321847
Roundness	1	274684822	167.8	0.300817	t95*Pop Z031	0.501706	0.599589	0.548952
Roundness	1	274684822	167.8	-0.265939	t95*Pop Z032	0.787002	-0.337914	0.735518
Roundness	1	274684822	167.8	0.273159	t95*Pop Z033	1.53758	0.177655	0.859039
Roundness	1	274684822	167.8	0.0490295	t95*Pop Z034	1.53507	0.0319396	0.974528
Roundness	1	274684822	167.8	0.695045	t95*Pop Z035	0.507121	1.37057	0.170898
Roundness	1	274684822	167.8	-0.383829	t95*Pop Z036	0.899272	-0.426822	0.669626
Roundness	1	274684822	167.8	2.25294	t95*Pop Z037	0.509399	4.42274	1.11129e-05
Roundness	1	274684822	167.8	0.27401	t95*Pop Z038	0.558358	0.490741	0.623746
Roundness	2	3081671	6.8	0.340472	t123*Pop Z029	0.645555	0.52741	0.598057
Roundness	2	3081671	6.8	-0.267974	t123*Pop Z030	0.613331	-0.436917	0.662291
Roundness	2	3081671	6.8	-0.133904	t123*Pop Z031	0.367487	-0.364377	0.715674
Roundness	2	3081671	6.8	2.19211	t123*Pop Z032	1.0919	2.0076	0.045026
Roundness	2	3081671	6.8	-0.120017	t123*Pop Z033	0.63895	-0.187835	0.851054
Roundness	2	3081671	6.8	0.977183	t123*Pop Z034	0.526381	1.85642	0.0637663
Roundness	2	3081671	6.8	0.130825	t123*Pop Z035	1.53694	0.0851199	0.932188
Roundness	2	3081671	6.8	1.05557	t123*Pop Z036	0.33563	3.14504	0.00172289
Roundness	2	3081671	6.8	0.544434	t123*Pop Z037	0.496496	1.09655	0.273171
Roundness	2	3081671	6.8	3.14322	t123*Pop Z038	0.593631	5.29491	1.54515e-07
Roundness	2	12644166	36.2	6.6371	t135*Pop Z029	1.97029	3.36859	0.000792189
Roundness	2	12644166	36.2	2.22144	t135*Pop Z030	0.400496	5.54672	3.97355e-08
Roundness	2	12644166	36.2	1.33683	t135*Pop Z031	0.444598	3.00683	0.00272363
Roundness	2	12644166	36.2	1.23229	t135*Pop Z032	0.464134	2.65503	0.00809006
Roundness	2	12644166	36.2	1.8999	t135*Pop Z033	0.480136	3.957	8.27377e-05
Roundness	2	12644166	36.2	1.22636	t135*Pop Z034	0.473102	2.59216	0.00971398
Roundness	2	12644166	36.2	1.29065	t135*Pop Z035	0.605695	2.13086	0.0334096
Roundness	2	12644166	36.2	0.471563	t135*Pop Z036	0.600506	0.785276	0.432527
Roundness	2	12644166	36.2	-0.907702	t135*Pop Z037	0.519863	-1.74604	0.0811933
Roundness	2	12644166	36.2	-0.100496	t135*Pop Z038	0.59369	-0.169274	0.865624
Roundness	2	153794103	81.2	-0.130959	t165*Pop Z029	0.45734	-0.28635	0.774685
Roundness	2	153794103	81.2	1.22963	t165*Pop Z030	0.517272	2.37714	0.017685
Roundness	2	153794103	81.2	0.666275	t165*Pop Z031	0.562364	1.18478	0.236463
Roundness	2	153794103	81.2	1.39301	t165*Pop Z032	0.552271	2.52233	0.0118536
Roundness	2	153794103	81.2	1.26944	t165*Pop Z033	0.408837	3.10501	0.00197077
Roundness	2	153794103	81.2	0.970027	t165*Pop Z034	0.517755	1.87353	0.0613651
Roundness	2	153794103	81.2	-0.0734166	t165*Pop Z035	0.662174	-0.110872	0.911746
Roundness	2	153794103	81.2	1.76687	t165*Pop Z036	0.443445	3.9844	7.39137e-05
Roundness	2	153794103	81.2	0.906934	t165*Pop Z037	0.476465	1.90347	0.0573434
Roundness	2	153794103	81.2	1.26547	t165*Pop Z038	0.476967	2.65316	0.00813461
Roundness	4	9759854	25.9	3.7048	t290*Pop Z029	0.773092	4.79219	1.97123e-06
Roundness	4	9759854	25.9	0.813839	t290*Pop Z030	1.5412	0.528054	0.59761
Roundness	4	9759854	25.9	2.19694	t290*Pop Z031	1.07017	2.05288	0.0404139
Roundness	4	9759854	25.9	1.42707	t290*Pop Z032	1.17776	1.21168	0.225999
Roundness	4	9759854	25.9	1.8652	t290*Pop Z033	0.726707	2.56665	0.0104521
Roundness	4	9759854	25.9	0	t290*Pop Z034	-	-	-
Roundness	4	9759854	25.9	0.647075	t290*Pop Z035	0.691678	0.935514	0.34981
Roundness	4	9759854	25.9	0.0694863	t290*Pop Z036	0.398644	0.174307	0.861669
Roundness	4	9759854	25.9	1.23584	t290*Pop Z037	0.692024	1.78583	0.0745105
Roundness	4	9759854	25.9	-0.760405	t290*Pop Z038	2.00864	-0.378567	0.705111
Roundness	5	188967651	98.2	0.847955	t437*Pop Z029	0.645555	1.31353	0.189386
Roundness	5	188967651	98.2	1.41278	t437*Pop Z030	0.695081	2.03254	0.042433
Roundness	5	188967651	98.2	1.42848	t437*Pop Z031	0.448274	3.18663	0.00149608
Roundness	5	188967651	98.2	-0.104392	t437*Pop Z032	1.0919	-0.0956052	0.923858
Roundness	5	188967651	98.2	1.25734	t437*Pop Z033	0.445027	2.82532	0.00484266
Roundness	5	188967651	98.2	2.06332	t437*Pop Z034	0.633656	3.25622	0.00117728
Roundness	5	188967651	98.2	2.42213	t437*Pop Z035	0.871016	2.78081	0.0055515
Roundness	5	188967651	98.2	1.68967	t437*Pop Z036	1.53577	1.10021	0.271575
Roundness	5	188967651	98.2	-0.772213	t437*Pop Z037	0.592503	-1.30331	0.19285
Roundness	5	188967651	98.2	1.88107	t437*Pop Z038	0.458957	4.09859	4.58705e-05
Width	1	6234332	11.5	-0.485671	t6*Pop Z029	0.129401	-3.75322	0.000187203
Width	1	6234332	11.5	-0.31875	t6*Pop Z030	0.25862	-1.2325	0.218124
Width	1	6234332	11.5	-0.0356599	t6*Pop Z031	0.105486	-0.338053	0.735412
Width	1	6234332	11.5	-0.170111	t6*Pop Z032	0.183404	-0.927518	0.353937
Width	1	6234332	11.5	0.0950724	t6*Pop Z033	0.18351	0.518077	0.604548
Width	1	6234332	11.5	-0.122652	t6*Pop Z034	0.106224	-1.15466	0.248574
Width	1	6234332	11.5	-0.0971134	t6*Pop Z035	0.106708	-0.910085	0.363052
Width	1	6234332	11.5	-0.107263	t6*Pop Z036	0.0677738	-1.58266	0.113895
Width	1	6234332	11.5	-0.311515	t6*Pop Z037	0.174205	-1.78821	0.0741201
Width	1	6234332	11.5	0.39478	t6*Pop Z038	0.0890743	4.43204	1.06364e-05
Width	1	269324476	162.2	-0.177951	t91*Pop Z029	0.0925343	-1.92308	0.0548249
Width	1	269324476	162.2	-0.169765	t91*Pop Z030	0.133388	-1.27272	0.203488
Width	1	269324476	162.2	-0.154368	t91*Pop Z031	0.0643982	-2.39709	0.0167545
Width	1	269324476	162.2	-0.30881	t91*Pop Z032	0.0704263	-4.38487	1.31556e-05
Width	1	269324476	162.2	-0.156807	t91*Pop Z033	0.349646	-0.448472	0.653934
Width	1	269324476	162.2	0.256899	t91*Pop Z034	0.572821	0.44848	0.653928
Width	1	269324476	162.2	-0.0562631	t91*Pop Z035	0.10071	-0.558664	0.576548
Width	1	269324476	162.2	-0.240276	t91*Pop Z036	0.0990552	-2.42568	0.0155002
Width	1	269324476	162.2	-0.106068	t91*Pop Z037	0.133857	-0.792398	0.428364
Width	1	269324476	162.2	-0.244642	t91*Pop Z038	0.0895023	-2.73335	0.00640771
Width	2	27869268	58.8	0.334352	t146*Pop Z029	0.152778	2.18848	0.0289228
Width	2	27869268	58.8	0.348632	t146*Pop Z030	0.06264	5.56564	3.56492e-08
Width	2	27869268	58.8	0.130451	t146*Pop Z031	0.069964	1.86455	0.0626111
Width	2	27869268	58.8	0.387147	t146*Pop Z032	0.0875138	4.42384	1.10385e-05
Width	2	27869268	58.8	0.196364	t146*Pop Z033	0.121716	1.61331	0.107072
Width	2	27869268	58.8	0.129045	t146*Pop Z034	0.0703585	1.83411	0.0670092
Width	2	27869268	58.8	0.195876	t146*Pop Z035	0.0756467	2.58935	0.00979053
Width	2	27869268	58.8	0.251835	t146*Pop Z036	0.0948582	2.65486	0.0080919
Width	2	27869268	58.8	-0.025427	t146*Pop Z037	0.370198	-0.0686849	0.945258
Width	2	27869268	58.8	0.104545	t146*Pop Z038	0.0769628	1.35838	0.174725
Width	3	148289200	65.4	0.0687042	t234*Pop Z029	0.129401	0.53094	0.595608
Width	3	148289200	65.4	0.123726	t234*Pop Z030	0.116642	1.06073	0.289133
Width	3	148289200	65.4	0.0605432	t234*Pop Z031	0.0730444	0.828856	0.407433
Width	3	148289200	65.4	-0.0863746	t234*Pop Z032	0.0744069	-1.16084	0.246053
Width	3	148289200	65.4	-0.374446	t234*Pop Z033	0.0672191	-5.57053	3.47004e-08
Width	3	148289200	65.4	-0.238049	t234*Pop Z034	0.183221	-1.29924	0.194235
Width	3	148289200	65.4	-0.0828777	t234*Pop Z035	0.183853	-0.450782	0.652269
Width	3	148289200	65.4	-0.260476	t234*Pop Z036	0.0841335	-3.09598	0.00203002
Width	3	148289200	65.4	-0.269303	t234*Pop Z037	0.225047	-1.19666	0.231795
Width	3	148289200	65.4	-0.0400604	t234*Pop Z038	0.109153	-0.367011	0.713708
Width	6	142454079	55.7	0	t492*Pop Z029	-	-	-
Width	6	142454079	55.7	-0.52916	t492*Pop Z030	0.25862	-2.04609	0.0410743
Width	6	142454079	55.7	-0.224322	t492*Pop Z031	0.0753166	-2.97838	0.00298531
Width	6	142454079	55.7	-0.201395	t492*Pop Z032	0.132213	-1.52326	0.128089
Width	6	142454079	55.7	0.13376	t492*Pop Z033	0.155403	0.860726	0.389647
Width	6	142454079	55.7	-0.244159	t492*Pop Z034	0.257484	-0.948247	0.34329
Width	6	142454079	55.7	0.0726107	t492*Pop Z035	0.151303	0.479903	0.631428
Width	6	142454079	55.7	-0.74336	t492*Pop Z036	0.257604	-2.88567	0.00401093
Width	6	142454079	55.7	0	t492*Pop Z037	-	-	-
Width	6	142454079	55.7	-0.195421	t492*Pop Z038	0.0939014	-2.08113	0.0377397
Length	1	10096012	20.1	t10*Pop Z029	-1.70679	0.281708	-6.05871	2.17719e-09
Length	1	10096012	20.1	t10*Pop Z030	0	-	-	-
Length	1	10096012	20.1	t10*Pop Z031	-0.38726	0.218689	-1.77082	0.0769991
Length	1	10096012	20.1	t10*Pop Z032	-0.389739	0.126135	-3.08985	0.00207705
Length	1	10096012	20.1	t10*Pop Z033	-0.475189	0.304504	-1.56053	0.119058
Length	1	10096012	20.1	t10*Pop Z034	-0.48948	0.19244	-2.54354	0.0111745
Length	1	10096012	20.1	t10*Pop Z035	0.0521774	0.172811	0.301933	0.762788
Length	1	10096012	20.1	t10*Pop Z036	-0.122108	0.118731	-1.02844	0.304076
Length	1	10096012	20.1	t10*Pop Z037	-0.00855196	0.390162	-0.021919	0.982518
Length	1	10096012	20.1	t10*Pop Z038	-0.420509	0.143833	-2.9236	0.00356499
Length	1	60165124	72	t42*Pop Z029	-0.407202	0.159263	-2.55679	0.0107615
Length	1	60165124	72	t42*Pop Z030	0	-	-	-
Length	1	60165124	72	t42*Pop Z031	-0.142768	0.159617	-0.89444	0.371376
Length	1	60165124	72	t42*Pop Z032	-0.773831	0.301696	-2.56494	0.0105142
Length	1	60165124	72	t42*Pop Z033	-0.106103	0.234719	-0.452042	0.65137
Length	1	60165124	72	t42*Pop Z034	-0.160231	0.180058	-0.889885	0.373815
Length	1	60165124	72	t42*Pop Z035	-0.864283	0.200856	-4.303	1.90978e-05
Length	1	60165124	72	t42*Pop Z036	-0.307728	0.16661	-1.84699	0.0651448
Length	1	60165124	72	t42*Pop Z037	-0.175495	0.227637	-0.770941	0.440986
Length	1	60165124	72	t42*Pop Z038	-0.361507	0.249166	-1.45087	0.147238
Length	1	259375688	155.6	t88*Pop Z029	-0.877823	0.13477	-6.51347	1.35074e-10
Length	1	259375688	155.6	t88*Pop Z030	-0.423477	0.202859	-2.08755	0.0371777
Length	1	259375688	155.6	t88*Pop Z031	-0.300307	0.0837257	-3.5868	0.000356631
Length	1	259375688	155.6	t88*Pop Z032	-0.542182	0.095938	-5.65138	2.26669e-08
Length	1	259375688	155.6	t88*Pop Z033	0.0538593	0.194918	0.276318	0.782381
Length	1	259375688	155.6	t88*Pop Z034	-0.0184405	0.54296	-0.033963	0.972916
Length	1	259375688	155.6	t88*Pop Z035	-0.394259	0.142772	-2.76145	0.00589623
Length	1	259375688	155.6	t88*Pop Z036	-0.228661	0.126739	-1.80419	0.0716056
Length	1	259375688	155.6	t88*Pop Z037	-0.641108	0.111258	-5.76234	1.2141e-08
Length	1	259375688	155.6	t88*Pop Z038	-0.40697	0.11561	-3.52019	0.00045746
Length	2	147310722	79.8	t162*Pop Z029	-0.408261	0.116712	-3.49803	0.000496531
Length	2	147310722	79.8	t162*Pop Z030	-0.147075	0.124934	-1.17722	0.239482
Length	2	147310722	79.8	t162*Pop Z031	-0.399376	0.174176	-2.29294	0.022129
Length	2	147310722	79.8	t162*Pop Z032	-0.179115	0.126194	-1.41935	0.156214
Length	2	147310722	79.8	t162*Pop Z033	-0.355258	0.104388	-3.40325	0.00070148
Length	2	147310722	79.8	t162*Pop Z034	-0.329311	0.192426	-1.71136	0.0874301
Length	2	147310722	79.8	t162*Pop Z035	-0.0374078	0.161985	-0.230933	0.81743
Length	2	147310722	79.8	t162*Pop Z036	-0.248065	0.113958	-2.1768	0.0298088
Length	2	147310722	79.8	t162*Pop Z037	-0.49527	0.123794	-4.00077	6.94394e-05
Length	2	147310722	79.8	t162*Pop Z038	-0.287977	0.138299	-2.08228	0.0376575
Length	2	228860302	139.7	t195*Pop Z029	2.61899	0.672647	3.89355	0.000107652
Length	2	228860302	139.7	t195*Pop Z030	-0.452227	0.40609	-1.11361	0.265804
Length	2	228860302	139.7	t195*Pop Z031	-0.384127	0.0662735	-5.79609	1.00203e-08
Length	2	228860302	139.7	t195*Pop Z032	-0.0520891	0.108317	-0.480894	0.630733
Length	2	228860302	139.7	t195*Pop Z033	-0.528581	0.389836	-1.35591	0.17554
Length	2	228860302	139.7	t195*Pop Z034	0.0426087	0.161747	0.263429	0.792293
Length	2	228860302	139.7	t195*Pop Z035	-0.0350653	0.172351	-0.203453	0.838836
Length	2	228860302	139.7	t195*Pop Z036	-0.247741	0.185278	-1.33713	0.181588
Length	2	228860302	139.7	t195*Pop Z037	-0.28782	0.0844543	-3.408	0.000689581
Length	2	228860302	139.7	t195*Pop Z038	-0.470051	0.203186	-2.3134	0.0209722
Length	3	148555854	67.2	t236*Pop Z029	0.0641555	0.196201	0.326989	0.743768
Length	3	148555854	67.2	t236*Pop Z030	-0.227443	0.353444	-0.643504	0.520095
Length	3	148555854	67.2	t236*Pop Z031	-0.271146	0.103348	-2.62363	0.00887786
Length	3	148555854	67.2	t236*Pop Z032	-0.0737579	0.135177	-0.545637	0.585479
Length	3	148555854	67.2	t236*Pop Z033	-0.807893	0.115997	-6.96476	7.23516e-12
Length	3	148555854	67.2	t236*Pop Z034	-0.047189	0.265586	-0.177679	0.859024
Length	3	148555854	67.2	t236*Pop Z035	-0.476604	0.227434	-2.09557	0.0364577
Length	3	148555854	67.2	t236*Pop Z036	-0.36116	0.136769	-2.64066	0.00844767
Length	3	148555854	67.2	t236*Pop Z037	0	-	-	-
Length	3	148555854	67.2	t236*Pop Z038	-0.550275	0.168022	-3.27501	0.00110543
Length	4	181229893	93.2	t332*Pop Z029	0	-	-	-
Length	4	181229893	93.2	t332*Pop Z030	-0.480739	0.163077	-2.94792	0.00329921
Length	4	181229893	93.2	t332*Pop Z031	-0.26617	0.130391	-2.04132	0.0415706
Length	4	181229893	93.2	t332*Pop Z032	-0.610205	0.116758	-5.22626	2.24816e-07
Length	4	181229893	93.2	t332*Pop Z033	-0.481226	0.170644	-2.82006	0.00492904
Length	4	181229893	93.2	t332*Pop Z034	-0.0276171	0.172391	-0.160201	0.872767
Length	4	181229893	93.2	t332*Pop Z035	-0.429331	0.195136	-2.20016	0.0281016
Length	4	181229893	93.2	t332*Pop Z036	-0.205913	0.106033	-1.94197	0.0525173
Length	4	181229893	93.2	t332*Pop Z037	-0.434133	0.118518	-3.66302	0.000266905
Length	4	181229893	93.2	t332*Pop Z038	-0.548112	0.152292	-3.59908	0.000340483
Length	5	84251695	68.7	t410*Pop Z029	0.476111	0.392401	1.21333	0.225389
Length	5	84251695	68.7	t410*Pop Z030	0	-	-	-
Length	5	84251695	68.7	t410*Pop Z031	-0.798496	0.124151	-6.43164	2.25577e-10
Length	5	84251695	68.7	t410*Pop Z032	-0.335541	0.101043	-3.32077	0.000941413
Length	5	84251695	68.7	t410*Pop Z033	-0.0839721	0.179229	-0.468519	0.639551
Length	5	84251695	68.7	t410*Pop Z034	-0.0931944	0.17836	-0.522506	0.601474
Length	5	84251695	68.7	t410*Pop Z035	-0.331946	0.122163	-2.71725	0.00673555
Length	5	84251695	68.7	t410*Pop Z036	-0.905736	0.194941	-4.6462	3.99733e-06
Length	5	84251695	68.7	t410*Pop Z037	-0.661443	0.140986	-4.69154	3.22609e-06
Length	5	84251695	68.7	t410*Pop Z038	-0.337876	0.111469	-3.03113	0.0025208
Length	5	201667249	108.8	t445*Pop Z029	-0.509212	0.13477	-3.77836	0.000170466
Length	5	201667249	108.8	t445*Pop Z030	-0.256277	0.165756	-1.54611	0.122503
Length	5	201667249	108.8	t445*Pop Z031	-0.47196	0.123919	-3.80861	0.000151259
Length	5	201667249	108.8	t445*Pop Z032	0.184923	0.271529	0.681041	0.496057
Length	5	201667249	108.8	t445*Pop Z033	-0.137263	0.155223	-0.884295	0.376822
Length	5	201667249	108.8	t445*Pop Z034	-0.111624	0.174142	-0.640995	0.521723
Length	5	201667249	108.8	t445*Pop Z035	0.680194	0.819963	0.829543	0.407063
Length	5	201667249	108.8	t445*Pop Z036	0.198696	0.244367	0.813104	0.416418
Length	5	201667249	108.8	t445*Pop Z037	0.203816	0.123742	1.6471	0.0999585
Length	5	201667249	108.8	t445*Pop Z038	-0.430254	0.232926	-1.84717	0.0651185
Length	7	134099896	69.8	t531*Pop Z029	-0.36192	0.121298	-2.98372	0.00294074
Length	7	134099896	69.8	t531*Pop Z030	-0.792002	0.391254	-2.02426	0.0432993
Length	7	134099896	69.8	t531*Pop Z031	-0.0549066	0.108969	-0.503874	0.614499
Length	7	134099896	69.8	t531*Pop Z032	-0.0759492	0.126241	-0.601619	0.547611
Length	7	134099896	69.8	t531*Pop Z033	-0.151548	0.169197	-0.895686	0.37071
Length	7	134099896	69.8	t531*Pop Z034	-0.189606	0.389252	-0.487104	0.626328
Length	7	134099896	69.8	t531*Pop Z035	-0.0842241	0.0824669	-1.02131	0.30744
Length	7	134099896	69.8	t531*Pop Z036	0.0484266	0.0960974	0.503932	0.614458
Length	7	134099896	69.8	t531*Pop Z037	-0.412806	0.119865	-3.44393	0.000605377
Length	7	134099896	69.8	t531*Pop Z038	-0.583291	0.168811	-3.45528	0.000580839
Length	8	101775361	57.7	t581*Pop Z029	0	-	-	-
Length	8	101775361	57.7	t581*Pop Z030	-0.532184	0.121805	-4.36914	1.42432e-05
Length	8	101775361	57.7	t581*Pop Z031	-0.290312	0.138784	-2.09182	0.0367922
Length	8	101775361	57.7	t581*Pop Z032	-0.293498	0.114123	-2.57178	0.0103106
Length	8	101775361	57.7	t581*Pop Z033	-0.236721	0.13067	-1.81159	0.070452
Length	8	101775361	57.7	t581*Pop Z034	-0.146677	0.142427	-1.02984	0.303419
Length	8	101775361	57.7	t581*Pop Z035	0	-	-	-
Length	8	101775361	57.7	t581*Pop Z036	-0.301621	0.153212	-1.96865	0.0493631
Length	8	101775361	57.7	t581*Pop Z037	-0.378436	0.177675	-2.12994	0.0335036
Length	8	101775361	57.7	t581*Pop Z038	-0.342959	0.125137	-2.74067	0.00627826
L/W	1	274684822	167.8	t95*Pop Z029	-0.112097	0.0225366	-4.974	8.03183e-07
L/W	1	274684822	167.8	t95*Pop Z030	-0.0415235	0.0590349	-0.703373	0.482028
L/W	1	274684822	167.8	t95*Pop Z031	-0.0187895	0.0269	-0.698494	0.485072
L/W	1	274684822	167.8	t95*Pop Z032	0.0283636	0.0424791	0.667706	0.504514
L/W	1	274684822	167.8	t95*Pop Z033	0.15423	0.0955066	1.61486	0.106736
L/W	1	274684822	167.8	t95*Pop Z034	0.00083234	0.082325	0.0101104	0.991936
L/W	1	274684822	167.8	t95*Pop Z035	-0.0338042	0.0275232	-1.22821	0.219731
L/W	1	274684822	167.8	t95*Pop Z036	0.0149321	0.0482119	0.309718	0.756856
L/W	1	274684822	167.8	t95*Pop Z037	-0.113213	0.0280666	-4.03371	6.01688e-05
L/W	1	274684822	167.8	t95*Pop Z038	-0.00987836	0.0299038	-0.330338	0.741231
L/W	2	3606091	10	t124*Pop Z029	-0.0367288	0.0414197	-0.886747	0.375482
L/W	2	3606091	10	t124*Pop Z030	0.0376791	0.0498954	0.755162	0.450375
L/W	2	3606091	10	t124*Pop Z031	0.00867637	0.0193096	0.44933	0.653315
L/W	2	3606091	10	t124*Pop Z032	-0.106519	0.0554716	-1.92025	0.0551815
L/W	2	3606091	10	t124*Pop Z033	0.00237801	0.0364292	0.0652775	0.947969
L/W	2	3606091	10	t124*Pop Z034	-0.063382	0.0420227	-1.50828	0.131878
L/W	2	3606091	10	t124*Pop Z035	-0.000836807	0.0824332	-0.0101513	0.991903
L/W	2	3606091	10	t124*Pop Z036	-0.0860795	0.022818	-3.77243	0.000173604
L/W	2	3606091	10	t124*Pop Z037	-0.0325886	0.0266146	-1.22446	0.221139
L/W	2	3606091	10	t124*Pop Z038	-0.152948	0.0290014	-5.27381	1.72163e-07
L/W	2	19917977	49.8	t139*Pop Z029	-0.286177	0.105688	-2.70776	0.00691871
L/W	2	19917977	49.8	t139*Pop Z030	-0.125591	0.0223111	-5.62911	2.50776e-08
L/W	2	19917977	49.8	t139*Pop Z031	-0.0695463	0.0213224	-3.26165	0.00115462
L/W	2	19917977	49.8	t139*Pop Z032	-0.127514	0.0330122	-3.86265	0.000121245
L/W	2	19917977	49.8	t139*Pop Z033	-0.0979053	0.0251329	-3.89551	0.000106194
L/W	2	19917977	49.8	t139*Pop Z034	-0.0513925	0.0218896	-2.3478	0.0191278
L/W	2	19917977	49.8	t139*Pop Z035	-0.0600328	0.0275232	-2.18117	0.0294618
L/W	2	19917977	49.8	t139*Pop Z036	-0.0977346	0.0482119	-2.02719	0.0429748
L/W	2	19917977	49.8	t139*Pop Z037	0.0162921	0.0350505	0.464819	0.642188
L/W	2	19917977	49.8	t139*Pop Z038	0.0386747	0.0324109	1.19326	0.233121
L/W	4	9759854	25.9	t290*Pop Z029	-0.177824	0.0414197	-4.29322	1.97737e-05
L/W	4	9759854	25.9	t290*Pop Z030	-0.0328985	0.0826461	-0.398065	0.690688
L/W	4	9759854	25.9	t290*Pop Z031	-0.137552	0.0524028	-2.6249	0.00883303
L/W	4	9759854	25.9	t290*Pop Z032	-0.0596503	0.0605088	-0.985812	0.324524
L/W	4	9759854	25.9	t290*Pop Z033	-0.0801008	0.0387255	-2.06843	0.0389211
L/W	4	9759854	25.9	t290*Pop Z034	0	-	-	-
L/W	4	9759854	25.9	t290*Pop Z035	-0.0375501	0.0370918	-1.01236	0.311674
L/W	4	9759854	25.9	t290*Pop Z036	-0.0106572	0.0213298	-0.49964	0.617466
L/W	4	9759854	25.9	t290*Pop Z037	-0.0592089	0.0370772	-1.59691	0.110681
L/W	4	9759854	25.9	t290*Pop Z038	-0.0268902	0.10351	-0.259784	0.795097
L/W	5	188967651	98.2	t437*Pop Z029	-0.042635	0.0345176	-1.23517	0.21713
L/W	5	188967651	98.2	t437*Pop Z030	-0.0878731	0.037262	-2.35825	0.0186012
L/W	5	188967651	98.2	t437*Pop Z031	-0.0648356	0.0238099	-2.72305	0.00660931
L/W	5	188967651	98.2	t437*Pop Z032	0.00887248	0.0585587	0.151514	0.879608
L/W	5	188967651	98.2	t437*Pop Z033	-0.0595452	0.0236986	-2.51261	0.0121802
L/W	5	188967651	98.2	t437*Pop Z034	-0.100143	0.0339663	-2.94832	0.00328816
L/W	5	188967651	98.2	t437*Pop Z035	-0.129797	0.0466912	-2.7799	0.00556546
L/W	5	188967651	98.2	t437*Pop Z036	-0.0774846	0.0823695	-0.940695	0.347146
L/W	5	188967651	98.2	t437*Pop Z037	0.0301636	0.0317376	0.950407	0.342193
L/W	5	188967651	98.2	t437*Pop Z038	-0.0974941	0.0245714	-3.96779	7.90637e-05
PC1	1	15775282	31.7	-11.1424	t14*Pop Z029	1.68375	-6.61762	7.16738e-11
PC1	1	15775282	31.7	0	t14*Pop Z030	-	-	-
PC1	1	15775282	31.7	-2.2679	t14*Pop Z031	1.07646	-2.10683	0.0354809
PC1	1	15775282	31.7	-2.27785	t14*Pop Z032	0.648849	-3.5106	0.000475184
PC1	1	15775282	31.7	-2.2591	t14*Pop Z033	0.995471	-2.26937	0.0235431
PC1	1	15775282	31.7	-2.07681	t14*Pop Z034	0.980929	-2.11719	0.0345892
PC1	1	15775282	31.7	0.127514	t14*Pop Z035	0.959368	0.132914	0.894299
PC1	1	15775282	31.7	-1.41496	t14*Pop Z036	0.785924	-1.80038	0.0722225
PC1	1	15775282	31.7	0	t14*Pop Z037	-	-	-
PC1	1	15775282	31.7	-2.08268	t14*Pop Z038	1.07733	-1.93319	0.0536081
PC1	1	60165124	72	-3.24588	t42*Pop Z029	0.951821	-3.41018	0.000685725
PC1	1	60165124	72	0	t42*Pop Z030	-	-	-
PC1	1	60165124	72	-1.24201	t42*Pop Z031	0.949825	-1.30762	0.191423
PC1	1	60165124	72	-5.41386	t42*Pop Z032	1.73238	-3.1251	0.00184946
PC1	1	60165124	72	-0.737799	t42*Pop Z033	1.39574	-0.528608	0.597242
PC1	1	60165124	72	-1.43171	t42*Pop Z034	1.08893	-1.31479	0.189001
PC1	1	60165124	72	-6.3391	t42*Pop Z035	1.27507	-4.97158	8.32348e-07
PC1	1	60165124	72	-3.70969	t42*Pop Z036	1.0007	-3.7071	0.000225889
PC1	1	60165124	72	1.67151	t42*Pop Z037	1.45903	1.14563	0.252332
PC1	1	60165124	72	-1.44667	t42*Pop Z038	1.4178	-1.02036	0.307901
PC1	1	259375688	155.6	-1.86953	t88*Pop Z029	1.21804	-1.53487	0.12526
PC1	1	259375688	155.6	-4.46889	t88*Pop Z030	1.24905	-3.57784	0.000369853
PC1	1	259375688	155.6	-2.6412	t88*Pop Z031	0.522334	-5.05653	5.43268e-07
PC1	1	259375688	155.6	-3.3912	t88*Pop Z032	0.580276	-5.84412	7.7423e-09
PC1	1	259375688	155.6	-0.162573	t88*Pop Z033	1.15938	-0.140224	0.888522
PC1	1	259375688	155.6	6.36659	t88*Pop Z034	6.79642	0.936756	0.349201
PC1	1	259375688	155.6	-3.43879	t88*Pop Z035	1.19653	-2.87397	0.00417396
PC1	1	259375688	155.6	-1.76984	t88*Pop Z036	0.780035	-2.26893	0.0235704
PC1	1	259375688	155.6	-3.91552	t88*Pop Z037	0.707994	-5.53044	4.48414e-08
PC1	1	259375688	155.6	-3.43373	t88*Pop Z038	0.692131	-4.9611	8.76977e-07
PC1	1	287728786	181.9	-3.04054	t103*Pop Z029	0.771786	-3.93961	8.96273e-05
PC1	1	287728786	181.9	3.32429	t103*Pop Z030	1.47932	2.24718	0.0249333
PC1	1	287728786	181.9	0.382866	t103*Pop Z031	0.627241	0.610397	0.541793
PC1	1	287728786	181.9	2.44935	t103*Pop Z032	0.962942	2.54362	0.0111809
PC1	1	287728786	181.9	0	t103*Pop Z033	-	-	-
PC1	1	287728786	181.9	-0.266381	t103*Pop Z034	1.15802	-0.230032	0.818133
PC1	1	287728786	181.9	1.04005	t103*Pop Z035	1.63356	0.636675	0.52454
PC1	1	287728786	181.9	-0.234057	t103*Pop Z036	0.820906	-0.285121	0.775634
PC1	1	287728786	181.9	-0.771959	t103*Pop Z037	0.983938	-0.78456	0.432972
PC1	1	287728786	181.9	2.19087	t103*Pop Z038	1.08999	2.00998	0.0448086
PC1	2	222601043	132.9	24.8224	t190*Pop Z029	8.00959	3.09908	0.00201742
PC1	2	222601043	132.9	-2.71591	t190*Pop Z030	2.32761	-1.16682	0.243671
PC1	2	222601043	132.9	-2.50516	t190*Pop Z031	0.452637	-5.53458	4.38373e-08
PC1	2	222601043	132.9	0.261589	t190*Pop Z032	0.936616	0.279291	0.780102
PC1	2	222601043	132.9	-5.12556	t190*Pop Z033	4.63751	-1.10524	0.269428
PC1	2	222601043	132.9	-1.39924	t190*Pop Z034	0.749412	-1.86712	0.0622945
PC1	2	222601043	132.9	-0.260028	t190*Pop Z035	1.04707	-0.248339	0.803944
PC1	2	222601043	132.9	-1.20307	t190*Pop Z036	0.990851	-1.21418	0.225082
PC1	2	222601043	132.9	-2.93344	t190*Pop Z037	0.443036	-6.62122	7.00466e-11
PC1	2	222601043	132.9	-2.29267	t190*Pop Z038	1.73671	-1.32012	0.187217
PC1	3	143028421	63.9	0.504039	t232*Pop Z029	1.17001	0.430799	0.666745
PC1	3	143028421	63.9	-2.77788	t232*Pop Z030	1.35834	-2.04506	0.0412155
PC1	3	143028421	63.9	-2.03788	t232*Pop Z031	0.748153	-2.72389	0.00660962
PC1	3	143028421	63.9	-1.68093	t232*Pop Z032	1.04242	-1.61252	0.10729
PC1	3	143028421	63.9	-5.0946	t232*Pop Z033	0.636034	-8.00995	4.66804e-15
PC1	3	143028421	63.9	-4.81739	t232*Pop Z034	2.31603	-2.08002	0.0378801
PC1	3	143028421	63.9	-5.24213	t232*Pop Z035	2.12902	-2.46223	0.0140429
PC1	3	143028421	63.9	-3.39225	t232*Pop Z036	1.3112	-2.58712	0.00987466
PC1	3	143028421	63.9	-8.07817	t232*Pop Z037	4.64394	-1.73951	0.0823766
PC1	3	143028421	63.9	-2.67764	t232*Pop Z038	1.03458	-2.58814	0.00984588
PC1	3	201685053	107.7	-2.17736	t267*Pop Z029	0.800962	-2.71843	0.00671848
PC1	3	201685053	107.7	0	t267*Pop Z030	-	-	-
PC1	3	201685053	107.7	-2.32356	t267*Pop Z031	0.672648	-3.45434	0.000584219
PC1	3	201685053	107.7	-5.04464	t267*Pop Z032	2.55739	-1.97257	0.04893
PC1	3	201685053	107.7	-2.6991	t267*Pop Z033	0.749824	-3.59965	0.000340687
PC1	3	201685053	107.7	0	t267*Pop Z034	-	-	-
PC1	3	201685053	107.7	-3.52809	t267*Pop Z035	2.32222	-1.51928	0.129136
PC1	3	201685053	107.7	0	t267*Pop Z036	-	-	-
PC1	3	201685053	107.7	1.76989	t267*Pop Z037	2.17996	0.811891	0.417125
PC1	3	201685053	107.7	-2.90964	t267*Pop Z038	1.52866	-1.9034	0.0573905
PC1	4	35217409	52.8	-5.46253	t301*Pop Z029	2.34002	-2.3344	0.0198514
PC1	4	35217409	52.8	-4.13596	t301*Pop Z030	1.16381	-3.55382	0.00040467
PC1	4	35217409	52.8	-1.90598	t301*Pop Z031	0.64449	-2.95734	0.00320549
PC1	4	35217409	52.8	-1.05668	t301*Pop Z032	0.726035	-1.45541	0.145996
PC1	4	35217409	52.8	-4.164	t301*Pop Z033	1.36225	-3.0567	0.00232132
PC1	4	35217409	52.8	1.88366	t301*Pop Z034	1.89357	0.994763	0.320188
PC1	4	35217409	52.8	0	t301*Pop Z035	-	-	-
PC1	4	35217409	52.8	-0.866244	t301*Pop Z036	0.64729	-1.33826	0.181237
PC1	4	35217409	52.8	-6.18206	t301*Pop Z037	1.71834	-3.59769	0.000343218
PC1	4	35217409	52.8	-1.28747	t301*Pop Z038	1.74218	-0.738997	0.460152
PC1	4	181229893	93.2	0	t332*Pop Z029	-	-	-
PC1	4	181229893	93.2	-3.39231	t332*Pop Z030	0.969977	-3.49731	0.000499075
PC1	4	181229893	93.2	-1.01296	t332*Pop Z031	0.789421	-1.28316	0.199851
PC1	4	181229893	93.2	-2.94942	t332*Pop Z032	0.752348	-3.92029	9.69623e-05
PC1	4	181229893	93.2	-2.5029	t332*Pop Z033	1.02217	-2.44861	0.0145803
PC1	4	181229893	93.2	-1.13358	t332*Pop Z034	0.95758	-1.1838	0.236888
PC1	4	181229893	93.2	-1.29891	t332*Pop Z035	1.62502	-0.799321	0.42437
PC1	4	181229893	93.2	-1.40862	t332*Pop Z036	0.700575	-2.01066	0.0447368
PC1	4	181229893	93.2	-1.82851	t332*Pop Z037	0.794646	-2.30103	0.0216771
PC1	4	181229893	93.2	-3.76949	t332*Pop Z038	1.04571	-3.60471	0.00033423
PC1	5	98651459	70	11.4956	t412*Pop Z029	4.84439	2.37297	0.0179094
PC1	5	98651459	70	0	t412*Pop Z030	-	-	-
PC1	5	98651459	70	-4.63019	t412*Pop Z031	0.655624	-7.06227	3.89393e-12
PC1	5	98651459	70	-2.99793	t412*Pop Z032	0.754751	-3.97208	7.84727e-05
PC1	5	98651459	70	-0.772682	t412*Pop Z033	1.06551	-0.725178	0.468581
PC1	5	98651459	70	-5.37077	t412*Pop Z034	1.39813	-3.84138	0.000133227
PC1	5	98651459	70	-1.80897	t412*Pop Z035	0.828045	-2.18463	0.0292402
PC1	5	98651459	70	-5.01346	t412*Pop Z036	1.04511	-4.79705	1.96108e-06
PC1	5	98651459	70	-4.22259	t412*Pop Z037	0.799424	-5.28204	1.69802e-07
PC1	5	98651459	70	-2.25528	t412*Pop Z038	0.666159	-3.3855	0.00074936
PC1	5	201667249	108.8	-1.69239	t445*Pop Z029	0.830075	-2.03884	0.0418341
PC1	5	201667249	108.8	-1.89212	t445*Pop Z030	0.969977	-1.95069	0.0514853
PC1	5	201667249	108.8	-3.42737	t445*Pop Z031	0.779111	-4.39908	1.25291e-05
PC1	5	201667249	108.8	0.13318	t445*Pop Z032	1.60999	0.0827207	0.934097
PC1	5	201667249	108.8	-0.649743	t445*Pop Z033	0.92314	-0.70384	0.481762
PC1	5	201667249	108.8	0.193846	t445*Pop Z034	1.12687	0.172021	0.86347
PC1	5	201667249	108.8	12.8976	t445*Pop Z035	5.14957	2.50459	0.0124811
PC1	5	201667249	108.8	1.69296	t445*Pop Z036	1.62556	1.04146	0.298015
PC1	5	201667249	108.8	0.687348	t445*Pop Z037	0.757556	0.907323	0.364542
PC1	5	201667249	108.8	-0.64392	t445*Pop Z038	1.38599	-0.464591	0.642366
PC1	6	142454079	55.7	0	t492*Pop Z029	-	-	-
PC1	6	142454079	55.7	-5.82861	t492*Pop Z030	2.32761	-2.50412	0.0124976
PC1	6	142454079	55.7	-2.29902	t492*Pop Z031	0.720005	-3.19306	0.00146951
PC1	6	142454079	55.7	-3.82984	t492*Pop Z032	1.26144	-3.03609	0.00248383
PC1	6	142454079	55.7	-0.6935	t492*Pop Z033	1.47258	-0.470943	0.637825
PC1	6	142454079	55.7	-0.262874	t492*Pop Z034	3.44115	-0.0763914	0.939129
PC1	6	142454079	55.7	-2.43776	t492*Pop Z035	1.36668	-1.78371	0.0748953
PC1	6	142454079	55.7	-5.96669	t492*Pop Z036	2.31977	-2.5721	0.0103093
PC1	6	142454079	55.7	0	t492*Pop Z037	-	-	-
PC1	6	142454079	55.7	-2.58953	t492*Pop Z038	0.831879	-3.11287	0.00192671
PC1	7	129350989	63.7	-4.57334	t528*Pop Z029	1.10321	-4.14548	3.79828e-05
PC1	7	129350989	63.7	0	t528*Pop Z030	-	-	-
PC1	7	129350989	63.7	-3.78564	t528*Pop Z031	1.0173	-3.72126	0.000213814
PC1	7	129350989	63.7	-4.3681	t528*Pop Z032	1.73616	-2.51595	0.0120896
PC1	7	129350989	63.7	-1.85637	t528*Pop Z033	1.0789	-1.72061	0.0857549
PC1	7	129350989	63.7	-2.9254	t528*Pop Z034	2.31603	-1.26311	0.206963
PC1	7	129350989	63.7	-0.911313	t528*Pop Z035	0.73389	-1.24176	0.214734
PC1	7	129350989	63.7	-0.0999221	t528*Pop Z036	0.56334	-0.177374	0.859265
PC1	7	129350989	63.7	-0.219071	t528*Pop Z037	1.1343	-0.193133	0.846909
PC1	7	129350989	63.7	-2.21177	t528*Pop Z038	1.0999	-2.01088	0.0447132
PC1	7	142783202	75.3	1.44437	t537*Pop Z029	1.27091	1.13648	0.256137
PC1	7	142783202	75.3	-2.66401	t537*Pop Z030	1.16381	-2.28905	0.0223677
PC1	7	142783202	75.3	3.60972	t537*Pop Z031	1.2511	2.88525	0.00402896
PC1	7	142783202	75.3	-0.0107522	t537*Pop Z032	1.03906	-0.010348	0.991747
PC1	7	142783202	75.3	-0.866715	t537*Pop Z033	1.45746	-0.594674	0.55225
PC1	7	142783202	75.3	0	t537*Pop Z034	-	-	-
PC1	7	142783202	75.3	-1.317	t537*Pop Z035	0.697369	-1.88852	0.0593608
PC1	7	142783202	75.3	-1.31693	t537*Pop Z036	0.870984	-1.512	0.130976
PC1	7	142783202	75.3	-3.3779	t537*Pop Z037	1.23455	-2.73615	0.00637073
PC1	7	142783202	75.3	-1.98388	t537*Pop Z038	0.661825	-2.99759	0.00281564
PC1	8	101775361	57.7	0	t581*Pop Z029	-	-	-
PC1	8	101775361	57.7	-4.59015	t581*Pop Z030	0.724752	-6.3334	4.24129e-10
PC1	8	101775361	57.7	-2.02118	t581*Pop Z031	0.826716	-2.44483	0.0147326
PC1	8	101775361	57.7	-1.80708	t581*Pop Z032	0.910661	-1.98436	0.0475981
PC1	8	101775361	57.7	-1.76272	t581*Pop Z033	0.813223	-2.16758	0.0305206
PC1	8	101775361	57.7	-1.50243	t581*Pop Z034	1.29198	-1.16289	0.245263
PC1	8	101775361	57.7	0	t581*Pop Z035	-	-	-
PC1	8	101775361	57.7	-3.00799	t581*Pop Z036	0.895722	-3.35818	0.000826207
PC1	8	101775361	57.7	-4.95712	t581*Pop Z037	1.17199	-4.22967	2.645e-05
PC1	8	101775361	57.7	-2.29288	t581*Pop Z038	0.752538	-3.04687	0.0023976
PC2	1	6234332	11.5	-2.22134	t6*Pop Z029	0.632122	-3.51409	0.000465484
PC2	1	6234332	11.5	-1.04331	t6*Pop Z030	1.26288	-0.826132	0.40897
PC2	1	6234332	11.5	0.0948531	t6*Pop Z031	0.515054	0.184161	0.853932
PC2	1	6234332	11.5	-0.385488	t6*Pop Z032	0.894459	-0.430973	0.666601
PC2	1	6234332	11.5	0.71996	t6*Pop Z033	0.896732	0.802871	0.422283
PC2	1	6234332	11.5	0.0682264	t6*Pop Z034	0.51901	0.131455	0.895448
PC2	1	6234332	11.5	-0.267425	t6*Pop Z035	0.520546	-0.513739	0.607573
PC2	1	6234332	11.5	-0.354748	t6*Pop Z036	0.330782	-1.07245	0.283833
PC2	1	6234332	11.5	-1.36693	t6*Pop Z037	0.736977	-1.85477	0.0639883
PC2	1	6234332	11.5	1.99564	t6*Pop Z038	0.425257	4.69278	3.1586e-06
PC2	2	19917977	49.8	4.94535	t139*Pop Z029	1.26424	3.9117	9.92552e-05
PC2	2	19917977	49.8	1.63551	t139*Pop Z030	0.334922	4.88325	1.2551e-06
PC2	2	19917977	49.8	1.1114	t139*Pop Z031	0.293036	3.7927	0.000159985
PC2	2	19917977	49.8	1.3186	t139*Pop Z032	0.520421	2.53371	0.0114718
PC2	2	19917977	49.8	0.95428	t139*Pop Z033	0.326494	2.92281	0.00356446
PC2	2	19917977	49.8	0.648455	t139*Pop Z034	0.333748	1.94295	0.052365
PC2	2	19917977	49.8	1.0964	t139*Pop Z035	0.408394	2.68467	0.0074071
PC2	2	19917977	49.8	1.12538	t139*Pop Z036	0.740068	1.52065	0.128734
PC2	2	19917977	49.8	-0.00944129	t139*Pop Z037	0.523276	-0.0180426	0.985609
PC2	2	19917977	49.8	0.401091	t139*Pop Z038	0.38924	1.03045	0.303105
PC2	2	110826138	76.5	0.0761293	t159*Pop Z029	0.361213	0.21076	0.833127
PC2	2	110826138	76.5	0.984725	t159*Pop Z030	0.334922	2.94016	0.00337285
PC2	2	110826138	76.5	0.577277	t159*Pop Z031	0.420698	1.37219	0.170381
PC2	2	110826138	76.5	1.13639	t159*Pop Z032	0.37014	3.07015	0.0022102
PC2	2	110826138	76.5	0.454004	t159*Pop Z033	0.304982	1.48863	0.136972
PC2	2	110826138	76.5	-0.711697	t159*Pop Z034	0.51901	-1.37126	0.170671
PC2	2	110826138	76.5	0.391108	t159*Pop Z035	0.347585	1.12522	0.260828
PC2	2	110826138	76.5	1.60937	t159*Pop Z036	0.362921	4.43449	1.04893e-05
PC2	2	110826138	76.5	0.100445	t159*Pop Z037	0.487476	0.20605	0.836803
PC2	2	110826138	76.5	0.786535	t159*Pop Z038	0.345306	2.27779	0.0229962
PC3	1	269324476	162.2	0.764996	t91*Pop Z029	0.285779	2.67688	0.0075832
PC3	1	269324476	162.2	1.13655	t91*Pop Z030	0.411736	2.76039	0.00590542
PC3	1	269324476	162.2	0.703524	t91*Pop Z031	0.198797	3.5389	0.000424977
PC3	1	269324476	162.2	1.19963	t91*Pop Z032	0.21723	5.52241	4.52247e-08
PC3	1	269324476	162.2	-1.33225	t91*Pop Z033	0.794877	-1.67604	0.094121
PC3	1	269324476	162.2	0.546084	t91*Pop Z034	0.794342	0.687466	0.491988
PC3	1	269324476	162.2	0.278911	t91*Pop Z035	0.309772	0.900375	0.368192
PC3	1	269324476	162.2	0.894096	t91*Pop Z036	0.306978	2.91258	0.00368437
PC3	1	269324476	162.2	1.26282	t91*Pop Z037	0.357518	3.53219	0.000435738
PC3	1	269324476	162.2	1.22656	t91*Pop Z038	0.26993	4.54401	6.37096e-06
PC3	2	30906065	62.2	0.225105	t147*Pop Z029	0.250612	0.898219	0.369339
PC3	2	30906065	62.2	-0.855978	t147*Pop Z030	0.193426	-4.42535	1.09634e-05
PC3	2	30906065	62.2	-0.19614	t147*Pop Z031	0.325494	-0.602591	0.546952
PC3	2	30906065	62.2	-0.446955	t147*Pop Z032	0.248272	-1.80026	0.0721958
PC3	2	30906065	62.2	0.00895968	t147*Pop Z033	0.465446	0.0192497	0.984647
PC3	2	30906065	62.2	-0.289015	t147*Pop Z034	0.21754	-1.32856	0.184371
PC3	2	30906065	62.2	-0.760442	t147*Pop Z035	0.225033	-3.37924	0.000762041
PC3	2	30906065	62.2	-0.109172	t147*Pop Z036	0.263019	-0.415073	0.6782
PC3	2	30906065	62.2	-0.0833184	t147*Pop Z037	1.06044	-0.0785699	0.937394
PC3	2	30906065	62.2	-0.178682	t147*Pop Z038	0.264347	-0.675939	0.499275
PC3	2	215089816	123.9	0	t186*Pop Z029	-	-	-
PC3	2	215089816	123.9	-0.436985	t186*Pop Z030	0.797882	-0.547681	0.584063
PC3	2	215089816	123.9	0.402081	t186*Pop Z031	0.180467	2.22801	0.0261571
PC3	2	215089816	123.9	-0.745796	t186*Pop Z032	0.464259	-1.60642	0.108576
PC3	2	215089816	123.9	0.315251	t186*Pop Z033	0.794877	0.396603	0.691766
PC3	2	215089816	123.9	0.302415	t186*Pop Z034	0.26782	1.12917	0.259164
PC3	2	215089816	123.9	0.497398	t186*Pop Z035	0.795253	0.625459	0.531848
PC3	2	215089816	123.9	0.748929	t186*Pop Z036	0.327985	2.28343	0.0226666
PC3	2	215089816	123.9	0.942939	t186*Pop Z037	0.15729	5.99492	3.07887e-09
PC3	2	215089816	123.9	0.0445368	t186*Pop Z038	0.358191	0.124338	0.901079
PC3	3	161257992	72.9	-0.363331	t240*Pop Z029	0.360638	-1.00747	0.314015
PC3	3	161257992	72.9	0.888232	t240*Pop Z030	0.719822	1.23396	0.21758
PC3	3	161257992	72.9	-0.00044512	t240*Pop Z031	0.166116	-0.00267958	0.997863
PC3	3	161257992	72.9	-0.152339	t240*Pop Z032	0.29139	-0.522803	0.601256
PC3	3	161257992	72.9	1.36689	t240*Pop Z033	0.221584	6.16873	1.09228e-09
PC3	3	161257992	72.9	0.254802	t240*Pop Z034	0.32778	0.777357	0.437178
PC3	3	161257992	72.9	0.480118	t240*Pop Z035	0.350587	1.36947	0.171237
PC3	3	161257992	72.9	0.914242	t240*Pop Z036	0.302561	3.02168	0.00259384
PC3	3	161257992	72.9	1.52102	t240*Pop Z037	0.66273	2.29509	0.0219861
PC3	3	161257992	72.9	0.86529	t240*Pop Z038	0.306773	2.82062	0.00491173
PC3	4	53078735	55.4	1.82045	t306*Pop Z029	0.798793	2.279	0.0229298
PC3	4	53078735	55.4	0.158439	t306*Pop Z030	0.359911	0.440216	0.659899
PC3	4	53078735	55.4	0.615423	t306*Pop Z031	0.242899	2.53366	0.0114776
PC3	4	53078735	55.4	0.620268	t306*Pop Z032	0.245015	2.53155	0.0115463
PC3	4	53078735	55.4	0.754972	t306*Pop Z033	0.465446	1.62204	0.105188
PC3	4	53078735	55.4	0.918714	t306*Pop Z034	0.328312	2.7983	0.00526081
PC3	4	53078735	55.4	0	t306*Pop Z035	-	-	-
PC3	4	53078735	55.4	0.408717	t306*Pop Z036	0.183868	2.22289	0.0265021
PC3	4	53078735	55.4	0.781458	t306*Pop Z037	0.256009	3.05247	0.00234476
PC3	4	53078735	55.4	0.928676	t306*Pop Z038	0.469828	1.97663	0.0484266
