# Supplementary material for: Genetic Analysis of Kernel Traits in Maize-Teosinte Introgression Populations
Source: G3 (Bethesda). 2016 Jun 9;6(8):2523–30. doi: 10.1534/g3.116.030155 (PMC4978905; doi:10.1534/g3.116.030155)
Supplement: Supplemental Material [file supp_g3.116.030155_TableS5.xlsx]

## Sheet: Table S5
Table S5. Pleiotropy in joint linkage analysis(xlsx).
Chr	cM_start	cM_end	Trait1	Trait2	Pearson's r	P-value
1	9.7	13.4	PC2	Width	0.98713	<0.0001
1	29.7	34.3	PC1	Area	0.97034	<0.0001
1	29.7	34.3	PC1	Perimeter	0.9526	<0.0001
1	29.7	34.3	Area	Perimeter	0.92472	0.0001
1	43.2	51.7	Wt50k	FFD	0.85725	0.0015
1	69.1	73.3	PC1	Area	0.99673	<0.0001
1	69.1	73.3	PC1	Length	0.88432	0.0007
1	69.1	73.3	Area	Length	0.89583	0.0005
1	151.8	157.7	PC1	Area	0.92859	0.0001
1	151.8	157.7	PC1	Length	0.58779	0.0739
1	151.8	157.7	PC1	Perimeter	0.89431	0.0005
1	151.8	157.7	Area	Length	0.76476	0.01
1	151.8	157.7	Area	Perimeter	0.94013	<0.0001
1	151.8	157.7	Length	Perimeter	0.84785	0.0019
1	157.6	164.6	PC3	Width	-0.19937	0.5808
1	157.6	164.6	PC3	Wt50k	0.28366	0.4271
1	157.6	164.6	Width	Wt50k	0.77597	0.0083
1	164.6	169.2	Roundness	L/W	-0.54925	0.1001
2	5.7	11.5	Roundness	L/W	-0.9638	<0.0001
2	36.2	53.4	Roundness	L/W	-0.92533	0.0001
2	36.2	53.4	Roundness	PC2	0.96685	<0.0001
2	36.2	53.4	L/W	PC2	-0.93018	<0.0001
2	56.9	64.2	Width	Area	-0.119	0.7433
2	56.9	64.2	Width	PC3	-0.25623	0.4749
2	56.9	64.2	Area	PC3	-0.57583	0.0815
2	72.1	85.5	Roundness	Length	0.01541	0.9663
2	72.1	85.5	Roundness	Perimeter	0.54679	0.1019
2	72.1	85.5	Roundness	PC2	0.5421	0.1055
2	72.1	85.5	Length	Perimeter	0.79844	0.0056
2	72.1	85.5	Length	PC2	0.41398	0.2343
2	72.1	85.5	Perimeter	PC2	0.61542	0.0582
2	120.5	139.8	FFD	Length	-0.15736	0.6642
2	120.5	139.8	FFD	Perimeter	-0.0456	0.9004
2	120.5	139.8	FFD	PC1	-0.19204	0.5951
2	120.5	139.8	FFD	PC3	0.82347	0.0034
2	120.5	139.8	FFD	Area	-0.22619	0.5297
2	120.5	139.8	Length	Perimeter	0.47309	0.1673
2	120.5	139.8	Length	PC1	0.99206	<0.0001
2	120.5	139.8	Length	PC3	-0.14118	0.6973
2	120.5	139.8	Length	Area	0.98032	<0.0001
2	120.5	139.8	Perimeter	PC1	0.42594	0.2197
2	120.5	139.8	Perimeter	PC3	-0.26855	0.4531
2	120.5	139.8	Perimeter	Area	0.37413	0.2868
2	120.5	139.8	PC1	PC3	-0.18406	0.6107
2	120.5	139.8	PC1	Area	0.99333	<0.0001
2	120.5	139.8	PC3	Area	-0.20157	0.5765
3	58.9	70.6	PC1	Length	0.19691	0.5856
3	58.9	70.6	PC1	Width	0.68931	0.0274
3	58.9	70.6	Length	Width	0.31639	0.3731
3	68.9	80.8	Perimeter	PC3	-0.54508	0.1032
3	68.9	80.8	Perimeter	Area	0.77407	0.0086
3	68.9	80.8	PC3	Area	-0.68979	0.0273
4	12.2	25.9	L/W	Roundness	-0.92925	0.0001
4	49.4	58.9	PC1	PC3	-0.34436	0.3299
4	49.4	58.9	PC1	Area	0.99408	<0.0001
4	49.4	58.9	PC3	Area	-0.36153	0.3047
4	89.1	97.9	Perimeter	PC1	0.89693	0.0004
4	89.1	97.9	Perimeter	Length	0.93891	<0.0001
4	89.1	97.9	Perimeter	Area	0.82277	0.0035
4	89.1	97.9	PC1	Length	0.84103	0.0023
4	89.1	97.9	PC1	Area	0.93389	<0.0001
4	89.1	97.9	Length	Area	0.76253	0.0103
5	63.2	74.8	Perimeter	PC1	0.9784	<0.0001
5	63.2	74.8	Perimeter	Length	0.78548	0.0071
5	63.2	74.8	Perimeter	Area	0.9846	<0.0001
5	63.2	74.8	Perimeter	Wt50k	0.96958	<0.0001
5	63.2	74.8	PC1	Length	0.80007	0.00504
5	63.2	74.8	PC1	Area	0.9833	<0.0001
5	63.2	74.8	PC1	Wt50k	0.96962	<0.0001
5	63.2	74.8	Length	Area	0.77836	0.008
5	63.2	74.8	Length	Wt50k	0.72623	0.0174
5	63.2	74.8	Area	Wt50k	0.974043	<0.0001
5	98.2	107	Roundness	L/W	-0.98727	<0.0001
5	106.4	110.9	Perimeter	PC1	0.97182	<0.0001
5	106.4	110.9	Perimeter	Length	0.83253	0.0028
5	106.4	110.9	PC1	Length	0.84552	0.0021
5	106.4	110.9	Width	PC1	0.81168	0.0044
5	106.4	110.9	Width	Area	0.89117	0.0005
5	106.4	110.9	PC1	Area	0.95772	<0.0001
7	61.4	64.9	PC1	Area	0.95636	<0.0001
7	64.9	81.2	PC1	Area	0.94569	<0.0001
7	64.9	81.2	PC1	Length	0.48889	0.1516
7	64.9	81.2	PC1	Perimeter	0.52947	0.1155
7	64.9	81.2	Area	Length	0.42893	0.2161
7	64.9	81.2	Area	Perimeter	0.42786	0.2174
7	64.9	81.2	Length	Perimeter	0.92993	<0.0001
8	52.7	64.2	PC1	Wt50k	0.87482	0.0009
8	52.7	64.2	PC1	Area	0.94342	<0.0001
8	52.7	64.2	PC1	Length	0.9078	0.0003
8	52.7	64.2	PC1	Perimeter	0.87898	0.0008
8	52.7	64.2	PC1	FFD	0.84452	0.0021
8	52.7	64.2	Wt50k	Area	0.76403	0.0101
8	52.7	64.2	Wt50k	Length	0.83452	0.0027
8	52.7	64.2	Wt50k	Perimeter	0.81899	0.0038
8	52.7	64.2	Wt50k	FFD	0.92814	0.0001
8	52.7	64.2	Area	Length	0.84759	0.002
8	52.7	64.2	Area	Perimeter	0.89017	0.0006
8	52.7	64.2	Area	FFD	0.72623	0.0174
8	52.7	64.2	Length	Perimeter	0.93195	<0.0001
8	52.7	64.2	Length	FFD	0.67631	0.0318
8	52.7	64.2	Perimeter	FFD	0.70375	0.0231
